# Supplementary material
Source: PubMed Central journal article supplement (PMC8105006)

**Supplementary Information for:**

**Reduced antibacterial drug resistance and blaCTX-M  $\beta$ -lactamase gene carriage in cattle-associated Escherichia coli at low temperatures, at sites dominated by older animals and on pastureland: implications for surveillance**

**Hannah Schubert<sup>1</sup>, Katy Morley<sup>1</sup>, Emma F. Puddy<sup>1,2</sup>, Robert Arbon<sup>3</sup>, Jacqueline Findlay<sup>2</sup>, Oliver Mounsey<sup>2</sup>, Virginia C. Gould<sup>1,2</sup>, Lucy Vass<sup>1,4</sup>, Madeleine Evans<sup>1</sup>, Gwen M. Rees<sup>1</sup>, David C. Barrett<sup>1</sup>, Katy M. Turner<sup>1</sup>, Tristan A. Cogan<sup>1</sup>, Matthew B. Avison<sup>2\*</sup>, Kristen K. Reyher<sup>1</sup>**

1) Bristol Veterinary School, University of Bristol

2) School of Cellular and Molecular Medicine, University of Bristol

3) Jean Golding Institute, University of Bristol

4) Bristol Population Health Science Institute, University of Bristol

\* Corresponding author: [bimba@bristol.ac.uk](mailto:bimba@bristol.ac.uk)

## Supplementary Tables

**Table S1:** All univariable analyses from the Calf dataset. All variables presented in the table were screened for association with *E. coli* carrying *bla*<sub>CTX-M</sub> using univariable, multilevel logistic regression with each variable entered as a fixed effect and with random intercepts for each farm. Variables with associations where the adjusted  $p < 0.25$  (after controlling for false discovery rate using the Benjamini-Hochberg procedure) were taken forward into the backwards stepwise model.

| Variable             | Odds ratio | Lower CI | Upper CI | p    | Adjusted p | Description                                                              |
|----------------------|------------|----------|----------|------|------------|--------------------------------------------------------------------------|
| s_temp               | 1.79       | 1.39     | 2.30     | 0.00 | 0.00       | Average monthly temperature                                              |
| s_cefq_dct_6m        | 4.22       | 1.80     | 9.90     | 0.00 | 0.01       | Use of cefquinome dry cow therapy in the last six months                 |
| s_fram_dct_6m        | 2.95       | 1.45     | 5.98     | 0.00 | 0.03       | Use of framycetin dry cow therapy in the last six months                 |
| f_trough_clean       | 0.43       | 0.24     | 0.77     | 0.00 | 0.04       | Daily cleaning of water troughs in calf housing                          |
| f_nsaiddiarr         | 0.28       | 0.10     | 0.76     | 0.01 | 0.08       | Routine use of anti-inflammatories in cases of calf diarrhoea            |
| f_ceph_1             | 0.45       | 0.23     | 0.88     | 0.02 | 0.12       | Total amount of first-generation cephalosporin use                       |
| f_poultry            | 2.64       | 1.05     | 6.63     | 0.04 | 0.19       | Presence of poultry on the farm                                          |
| f_rain               | 1.18       | 0.93     | 1.49     | 0.17 | 0.62       | Average monthly rainfall                                                 |
| f_give_col           | 2.01       | 0.72     | 5.58     | 0.18 | 0.62       | Administration of colostrum within six hours of life                     |
| f_pneum_vacc         | 0.51       | 0.20     | 1.29     | 0.15 | 0.62       | Routine use of calf respiratory vaccination                              |
| f_calf_housing_type  | 0.52       | 0.16     | 1.67     | 0.27 | 0.76       | Type of calf housing                                                     |
| f_anticocc           | 1.68       | 0.68     | 4.13     | 0.26 | 0.76       | Routine use of anticoccidials                                            |
| f_calving_group      | 1.85       | 0.41     | 8.40     | 0.43 | 0.80       | Whether calves were born in a group pen                                  |
| s_clox_dct_6m        | 0.62       | 0.22     | 1.76     | 0.37 | 0.80       | Use of cloxacillin dry cow therapy in the last six months                |
| f_scc                | 0.84       | 0.55     | 1.28     | 0.41 | 0.80       | Average herd somatic cell count                                          |
| f_geographical_area  | 1.66       | 0.49     | 5.61     | 0.42 | 0.80       | Geographical location of the farm                                        |
| f_heifers_waste      | 1.44       | 0.59     | 3.53     | 0.42 | 0.80       | Whether waste milk has been fed to heifers                               |
| f_anything_waste     | 1.45       | 0.54     | 3.88     | 0.46 | 0.83       | Whether waste milk was fed to any calves                                 |
| f_pattern            | 1.50       | 0.44     | 5.09     | 0.52 | 0.86       | Calving pattern                                                          |
| f_water              | 1.32       | 0.49     | 3.59     | 0.58 | 0.86       | Source of drinking water                                                 |
| f_calf_housing_older | 0.82       | 0.28     | 2.40     | 0.71 | 0.86       | Whether calves have been kept near to older animals                      |
| s_ceph_dct_6m        | 1.18       | 0.48     | 2.95     | 0.72 | 0.86       | Use of cephalonium dry cow therapy in the last six months                |
| f_um_spray           | 0.72       | 0.22     | 2.36     | 0.59 | 0.86       | Routine use of umbilical treatment                                       |
| f_time_dam           | 0.86       | 0.45     | 1.62     | 0.63 | 0.86       | Amount of time spent with dam                                            |
| f_halocur            | 1.16       | 0.46     | 2.98     | 0.75 | 0.86       | Routine use of treatment to prevent cryptosporidiosis                    |
| f_diarrvacc          | 0.79       | 0.30     | 2.06     | 0.63 | 0.86       | Routine use of calf enteric disease vaccination                          |
| f_bought_pre         | 0.92       | 0.61     | 1.39     | 0.70 | 0.86       | Number of cattle bought in the 12 months before the start of the project |
| f_herd_size          | 1.08       | 0.70     | 1.67     | 0.73 | 0.86       | Number of milking cows on the farm                                       |

|                |      |      |      |      |      |                                                            |
|----------------|------|------|------|------|------|------------------------------------------------------------|
| f_yield        | 1.08 | 0.69 | 1.69 | 0.72 | 0.86 | Average herd yield                                         |
| f_total_cattle | 0.92 | 0.59 | 1.42 | 0.69 | 0.86 | Total number of cattle on the farm                         |
| f_total_mg_pcu | 1.04 | 0.70 | 1.54 | 0.84 | 0.90 | Total antibiotic usage                                     |
| f_wean         | 1.16 | 0.34 | 3.93 | 0.81 | 0.90 | Age of weaning                                             |
| f_equine       | 0.94 | 0.39 | 2.30 | 0.90 | 0.92 | Presence of horses on the farm                             |
| f_ceph_3_4     | 1.02 | 0.64 | 1.64 | 0.93 | 0.93 | Amount of third- and fourth-generation cephalosporins used |

**Table S2:** All univariable analyses from the full dataset. All variables presented in the table were screened for association with *E. coli* carrying *bla*<sub>CTX-M</sub> using univariable, multilevel logistic regression with each variable entered as a fixed effect and with random intercepts for each farm. Variables with associations where the adjusted  $p < 0.25$  (after controlling for false discovery rate using the Benjamini-Hochberg procedure) were taken forwards into the backwards stepwise model.

| Variable         | Odds ratio | Lower CI | Upper CI | p    | Adjusted p | Description                                                            |
|------------------|------------|----------|----------|------|------------|------------------------------------------------------------------------|
| preweaned_heifer | 5.85       | 4.33     | 7.89     | 0.00 | 0.00       | Sample collected from a pre-weaned heifer                              |
| s_temp           | 1.52       | 1.32     | 1.76     | 0.00 | 0.00       | Average monthly temperature                                            |
| weaned_heifer    | 0.48       | 0.33     | 0.68     | 0.00 | 0.00       | Sample collected from a weaned heifer                                  |
| s_housed_outdoor | 0.30       | 0.17     | 0.54     | 0.00 | 0.00       | Sample collected from pastureland                                      |
| f_foragetype_3   | 3.11       | 1.51     | 6.43     | 0.00 | 0.03       | Maize silage used on farm                                              |
| footpath         | 0.37       | 0.20     | 0.70     | 0.00 | 0.03       | Sample collected from a public footpath                                |
| adult            | 0.62       | 0.46     | 0.84     | 0.00 | 0.03       | Sample collected from a milking cow                                    |
| dry              | 0.40       | 0.20     | 0.81     | 0.01 | 0.12       | Sample collected from a dry cow                                        |
| f_othergraze     | 0.47       | 0.25     | 0.86     | 0.02 | 0.15       | Use of grazing land away from the farm                                 |
| f_salmvacc       | 0.15       | 0.03     | 0.83     | 0.03 | 0.24       | Routine vaccination against Salmonella                                 |
| f_trough_clean   | 0.67       | 0.43     | 1.04     | 0.07 | 0.52       | Daily cleaning of water troughs in calf housing                        |
| f_cefq_dct       | 1.90       | 0.90     | 4.01     | 0.09 | 0.59       | Use of cefquinome dry cow therapy                                      |
| f_acf            | 1.71       | 0.90     | 3.21     | 0.10 | 0.59       | Use of automatic cluster flushing                                      |
| f_scc            | 0.75       | 0.53     | 1.06     | 0.10 | 0.59       | Average herd somatic cell count                                        |
| f_total_mg_pcu   | 1.23       | 0.94     | 1.60     | 0.13 | 0.62       | Total antibiotic usage                                                 |
| f_manure_7       | 0.14       | 0.01     | 1.67     | 0.12 | 0.62       | Use of composter for muck management                                   |
| f_manure_1       | 1.61       | 0.84     | 3.07     | 0.15 | 0.62       | Use of slurry lagoon                                                   |
| f_hunt           | 0.61       | 0.32     | 1.17     | 0.14 | 0.62       | Whether the hunt crosses the farm                                      |
| f_um_spray       | 0.54       | 0.23     | 1.25     | 0.15 | 0.62       | Routine use of umbilical treatment                                     |
| f_anticocc       | 1.60       | 0.84     | 3.05     | 0.15 | 0.62       | Routine use of anticoccidials                                          |
| f_lungvacc       | 0.63       | 0.31     | 1.25     | 0.18 | 0.64       | Routine vaccination against lungworm                                   |
| f_bvdvacc        | 1.59       | 0.79     | 3.19     | 0.19 | 0.64       | Routine vaccination against bovine viral diarrhoea                     |
| f_give_col       | 1.58       | 0.79     | 3.16     | 0.19 | 0.64       | Administration of colostrum within six hours of life                   |
| f_time_dam       | 0.74       | 0.47     | 1.16     | 0.19 | 0.64       | Time calf spends with the dam                                          |
| f_poultry        | 1.56       | 0.82     | 2.97     | 0.18 | 0.64       | Presence of poultry on the farm                                        |
| f_manure_3       | 0.66       | 0.32     | 1.37     | 0.27 | 0.73       | Use of a metal slurry store                                            |
| f_bedmilk_6      | 3.39       | 0.46     | 25.07    | 0.23 | 0.73       | Use of green bedding for milking cows                                  |
| f_rat            | 1.47       | 0.75     | 2.89     | 0.27 | 0.73       | Perceived level of rat infestation on the farm                         |
| f_cleancluster   | 1.27       | 0.82     | 1.98     | 0.28 | 0.73       | How often the milking cluster was cleaned                              |
| f_timesfirstmast | 1.18       | 0.87     | 1.61     | 0.28 | 0.73       | How often clinical mastitis cases were treated with intramammary tubes |
| f_leptovacc      | 1.50       | 0.71     | 3.16     | 0.29 | 0.73       | Routine use of leptospirosis vaccination                               |

|                      |      |      |      |      |      |                                                                          |
|----------------------|------|------|------|------|------|--------------------------------------------------------------------------|
| f_nsaiddiarr         | 0.64 | 0.30 | 1.36 | 0.24 | 0.73 | Routine use of anti-inflammatories in the case of calf diarrhoea         |
| f_anything_waste     | 1.49 | 0.74 | 2.98 | 0.26 | 0.73 | Whether waste milk was fed to any calves                                 |
| f_halocur            | 1.42 | 0.73 | 2.77 | 0.31 | 0.75 | Routine use of treatment to prevent cryptosporidiosis                    |
| f_water              | 1.39 | 0.69 | 2.81 | 0.36 | 0.84 | Source of drinking water                                                 |
| f_bedmilk_2          | 1.36 | 0.69 | 2.65 | 0.37 | 0.85 | Use of straw as milking cow bedding                                      |
| f_manure_8           | 1.47 | 0.56 | 3.85 | 0.43 | 0.88 | Use of separator for muck management                                     |
| f_manure_2           | 1.36 | 0.58 | 3.19 | 0.47 | 0.88 | Use of a weeping wall for slurry management                              |
| f_bedmilk_3          | 0.78 | 0.41 | 1.50 | 0.46 | 0.88 | Use of sawdust as milking cow bedding                                    |
| f_starling           | 0.77 | 0.39 | 1.52 | 0.46 | 0.88 | Perceived amount of starling infestation                                 |
| f_abcalve            | 1.42 | 0.62 | 3.23 | 0.40 | 0.88 | Routine use of antibiotics following a difficult calving                 |
| f_organic            | 0.58 | 0.14 | 2.48 | 0.47 | 0.88 | Whether the farm is certified organic                                    |
| f_clostrvacc         | 1.34 | 0.60 | 2.99 | 0.48 | 0.88 | Routine use of clostridial vaccine                                       |
| s_rain               | 0.95 | 0.83 | 1.09 | 0.48 | 0.88 | Average monthly rainfall                                                 |
| f_manure_4           | 0.81 | 0.43 | 1.54 | 0.52 | 0.89 | Use of a concrete slurry store                                           |
| f_foragetype_5       | 1.21 | 0.59 | 2.45 | 0.61 | 0.89 | Feeding of hay                                                           |
| f_foragetype_2       | 0.77 | 0.29 | 2.06 | 0.61 | 0.89 | Feeding of big bale grass silage                                         |
| f_aiexternal         | 1.21 | 0.64 | 2.30 | 0.55 | 0.89 | Artificial insemination performed by external company                    |
| f_pheasant           | 0.80 | 0.33 | 1.91 | 0.61 | 0.89 | Perceived amount of pheasants on farmland                                |
| f_deer               | 1.26 | 0.59 | 2.69 | 0.55 | 0.89 | Perceived amount of deer on farmland                                     |
| f_shows              | 1.47 | 0.46 | 4.72 | 0.52 | 0.89 | Whether cattle go to shows                                               |
| f_nsaidmast          | 1.09 | 0.81 | 1.47 | 0.58 | 0.89 | Routine use of anti-inflammatories in cases of mastitis                  |
| f_calf_housing_older | 0.81 | 0.37 | 1.78 | 0.60 | 0.89 | Whether calves have been kept near to older animals                      |
| f_herd_size          | 1.10 | 0.80 | 1.51 | 0.56 | 0.89 | Number of milking cows on the farm                                       |
| f_heifers_waste      | 1.20 | 0.62 | 2.35 | 0.59 | 0.89 | Whether waste milk has been fed to heifers                               |
| f_machinery          | 0.86 | 0.45 | 1.63 | 0.64 | 0.90 | Whether machinery was shared with other farms                            |
| f_muckspreader       | 0.86 | 0.45 | 1.66 | 0.66 | 0.90 | Use of a contract muck spreader                                          |
| f_calving_group      | 1.30 | 0.44 | 3.82 | 0.64 | 0.90 | Whether calves were born in a group pen                                  |
| f_diarrvacc          | 0.85 | 0.43 | 1.69 | 0.65 | 0.90 | Routine use of calf enteric disease vaccination                          |
| s_calving_now        | 1.15 | 0.60 | 2.22 | 0.67 | 0.90 | Whether cows were calving during the month in which the sample was taken |
| f_ceph_1             | 0.97 | 0.72 | 1.32 | 0.85 | 0.93 | Total amount of first-generation cephalosporin use                       |
| f_ceph_3_4           | 0.95 | 0.70 | 1.29 | 0.75 | 0.93 | Amount of third- and fourth- generation cephalosporins used              |
| f_clox_dct           | 0.92 | 0.42 | 2.02 | 0.83 | 0.93 | Use of cloxacillin dry cow therapy                                       |
| f_foragetype_4       | 1.12 | 0.59 | 2.13 | 0.73 | 0.93 | Feeding of whole crop silage                                             |
| f_bedmilk_4          | 0.66 | 0.06 | 7.33 | 0.74 | 0.93 | Use of paper waste for milking cow bedding                               |
| f_shoot              | 1.09 | 0.57 | 2.06 | 0.80 | 0.93 | Whether the shoot crosses the farm                                       |
| f_badger             | 1.10 | 0.40 | 3.01 | 0.86 | 0.93 | Perceived badger population on the farm                                  |
| f_premises           | 0.94 | 0.49 | 1.81 | 0.86 | 0.93 | Number of farm premises                                                  |

|                 |      |      |      |      |      |                                                                |
|-----------------|------|------|------|------|------|----------------------------------------------------------------|
| f_drytrough     | 0.95 | 0.60 | 1.50 | 0.84 | 0.93 | How often the dry cow water trough was cleaned out             |
| f_treatfoot     | 1.07 | 0.57 | 2.01 | 0.84 | 0.93 | Use of a footbath for lameness outbreaks                       |
| f_daystreatmast | 1.04 | 0.76 | 1.43 | 0.81 | 0.93 | Number of days cases of mastitis were treated with antibiotics |
| f_hectares      | 1.03 | 0.75 | 1.42 | 0.84 | 0.93 | Size of farm in hectares                                       |
| f_wean          | 0.88 | 0.33 | 2.31 | 0.79 | 0.93 | Age of weaning                                                 |
| f_equine        | 0.94 | 0.49 | 1.79 | 0.85 | 0.93 | Presence of horses on the farm                                 |
| f_manure_6      | 0.97 | 0.51 | 1.84 | 0.93 | 0.96 | Use of muck heap on concrete                                   |
| f_feedlorry     | 0.97 | 0.49 | 1.91 | 0.92 | 0.96 | Whether feed lorries crossed any cattle yards when delivering  |
| f_lime          | 1.03 | 0.53 | 1.99 | 0.93 | 0.96 | Use of lime in milking cow housing                             |
| f_pneum_vacc    | 0.97 | 0.49 | 1.92 | 0.93 | 0.96 | Routine use of calf respiratory vaccination                    |
| f_total_cattle  | 0.98 | 0.71 | 1.36 | 0.92 | 0.96 | Total number of cattle on the farm                             |
| f_foragetype_1  | 1.04 | 0.25 | 4.26 | 0.96 | 0.97 | Feeding of clamp grass silage                                  |
| f_bedmilk_1     | 0.99 | 0.49 | 2.00 | 0.99 | 0.99 | Use of sand in milking cow bedding                             |

**Table S3:** Results of the Bayesian analysis, odds ratios with 95% credible intervals associated with the presence of *E. coli* carrying *bla*<sub>CTX-M</sub>. The type of prior (diffuse/regularized) is also shown. Variables in *italics* were regularized and are ordered according to the average (for factor variables with more than two levels) magnitude of their effect.

| Variable                          | Odds ratio | Lower CI | Upper CI | Description                                                              |
|-----------------------------------|------------|----------|----------|--------------------------------------------------------------------------|
| total_mg_pcu                      | 1.16       | 0.78     | 1.69     | Total antibiotic usage                                                   |
| ceph_1                            | 1.01       | 0.69     | 1.45     | Total amount of first-generation cephalosporin use                       |
| ceph_3_4                          | 0.96       | 0.65     | 1.45     | Amount of third- and fourth- generation cephalosporins used              |
| <i>dry1</i>                       | 0.96       | 0.63     | 1.17     | Sample collected from the dry cow environment                            |
| <i>f_abcalve1</i>                 | 1.02       | 0.74     | 1.59     | Routine use of antibiotics following a difficult calving                 |
| <i>f_acf1</i>                     | 1.09       | 0.85     | 2.13     | Use of automatic cluster flushing                                        |
| <i>f_aiexternal1</i>              | 1.07       | 0.87     | 1.85     | Artificial insemination performed by external company                    |
| <i>f_anticocc1</i>                | 1.04       | 0.81     | 1.61     | Routine use of anticoccidials                                            |
| <i>f_anything_waste1</i>          | 1.03       | 0.81     | 1.59     | Whether waste milk was fed to any calves                                 |
| <i>f_badger2</i>                  | 1.01       | 0.74     | 1.51     | Perceived badger population on the farm                                  |
| <i>f_bedmilk_1yes</i>             | 0.99       | 0.67     | 1.37     | Use of sand in milking cow bedding                                       |
| <i>f_bedmilk_2yes</i>             | 1.03       | 0.79     | 1.54     | Use of straw as milking cow bedding                                      |
| <i>f_bedmilk_3yes</i>             | 0.98       | 0.67     | 1.24     | Use of sawdust as milking cow bedding                                    |
| <i>f_bedmilk_4yes</i>             | 1.00       | 0.60     | 1.60     | Use of paper waste for milking cow bedding                               |
| <i>f_bedmilk_6yes</i>             | 1.02       | 0.68     | 1.83     | Use of green bedding for milking cows                                    |
| <i>f_bought_pre</i>               | 0.96       | 0.69     | 1.12     | Number of cattle bought in the 12 months before the start of the project |
| <i>f_bvdvaccY</i>                 | 1.07       | 0.84     | 1.93     | Routine vaccination against bovine viral diarrhoea                       |
| <i>f_calf_housing_older1</i>      | 0.98       | 0.67     | 1.30     | Whether calves have been kept near to older animals                      |
| <i>f_calf_housing_type3</i>       | 1.01       | 0.76     | 1.40     | Type of calf housing                                                     |
| <i>f_calveclean.L</i>             | 1.00       | 0.76     | 1.31     | How often the calving pens are cleaned out                               |
| <i>f_calving_group1</i>           | 1.02       | 0.74     | 1.63     | Whether calves were born in a group pen                                  |
| <i>f_cefq_dct1</i>                | 1.04       | 0.80     | 1.66     | Use of cefquinome dry cow therapy                                        |
| <i>f_ceph_dct1</i>                | 0.84       | 0.31     | 1.15     | Use of cephalonium dry cow therapy                                       |
| <i>f_cleancluster.L</i>           | 1.03       | 0.85     | 1.42     | How often the milking cluster was cleaned                                |
| <i>f_clostvaccY</i>               | 1.01       | 0.73     | 1.48     | Routine use of clostridial vaccine                                       |
| <i>f_clox_dct1</i>                | 1.03       | 0.77     | 1.63     | Use of cloxacillin dry cow therapy                                       |
| <i>f_daystreatmast</i>            | 1.00       | 0.82     | 1.24     | Number of days cases of mastitis were treated with antibiotics           |
| <i>f_deer2</i>                    | 1.01       | 0.74     | 1.38     | Perceived amount of deer on farmland                                     |
| <i>f_diarrvaccY</i>               | 0.97       | 0.68     | 1.22     | Routine use of calf enteric disease vaccination                          |
| <i>f_drytrough.L</i>              | 0.98       | 0.70     | 1.20     | How often the dry cow water trough was cleaned out                       |
| <i>f_equine1</i>                  | 0.97       | 0.67     | 1.24     | Presence of horses on the farm                                           |
| <i>f_feedlorry1</i>               | 0.97       | 0.66     | 1.26     | Whether feed lorries crossed any cattle yards when delivering            |
| <i>f_firstmastitisCobactan</i>    | 1.02       | 0.67     | 1.71     | First line mastitis treatment                                            |
| <i>f_firstmastitisMastiplanLC</i> | 0.92       | 0.29     | 1.34     |                                                                          |

|                                     |      |      |      |                                                                       |
|-------------------------------------|------|------|------|-----------------------------------------------------------------------|
| <i>f_firstmastitisOrbeninLA</i>     | 0.93 | 0.33 | 1.41 |                                                                       |
| <i>f_firstmastitistdDmultinject</i> | 1.01 | 0.76 | 1.40 |                                                                       |
| <i>f_firstmastitisUbrolexin</i>     | 1.07 | 0.80 | 2.33 |                                                                       |
| <i>f_firstmastitisUbroYellow</i>    | 0.98 | 0.66 | 1.27 |                                                                       |
| <i>f_foragetype_1yes</i>            | 0.98 | 0.63 | 1.38 | Feeding of clamp grass silage                                         |
| <i>f_foragetype_2yes</i>            | 0.95 | 0.51 | 1.24 | Feeding of big bale grass silage                                      |
| <i>f_foragetype_3yes</i>            | 1.32 | 0.87 | 4.36 | Maize silage used on farm                                             |
| <i>f_foragetype_4yes</i>            | 1.02 | 0.81 | 1.46 | Feeding of whole crop silage                                          |
| <i>f_foragetype_5yes</i>            | 1.02 | 0.79 | 1.56 | Feeding of hay                                                        |
| <i>f_foragetype_6yes</i>            | 1.18 | 0.81 | 4.84 | Feeding of straw                                                      |
| <i>f_foragetype_7yes</i>            | 0.98 | 0.69 | 1.29 | Feeding of haylage                                                    |
| <i>f_fox2</i>                       | 1.00 | 0.75 | 1.33 | Perceived amount of foxes on farmland                                 |
| <i>f_fram_dct1</i>                  | 1.56 | 0.93 | 5.06 | Use of framycetin dry cow therapy                                     |
| <i>f_geographical_area2</i>         | 0.99 | 0.70 | 1.34 | Farm is in geographical area 2                                        |
| <i>f_geographical_area3</i>         | 1.15 | 0.87 | 2.75 | Farm is in geographical area 3                                        |
| <i>f_give_col1</i>                  | 1.03 | 0.78 | 1.57 | Administration of colostrum within six hours of life                  |
| <i>f_halocur1</i>                   | 1.01 | 0.79 | 1.41 | Routine use of treatment to prevent cryptosporidiosis                 |
| <i>f_hectares</i>                   | 1.01 | 0.85 | 1.26 | Size of farm in hectares                                              |
| <i>f_heifers_waste1</i>             | 1.09 | 0.85 | 2.15 | Whether waste milk has been fed to heifers                            |
| <i>f_herd_size</i>                  | 1.01 | 0.83 | 1.26 | Number of milking cows on the farm                                    |
| <i>f_hostfarmwalk1</i>              | 0.97 | 0.62 | 1.23 | Whether a farm walk has taken place on the farm in the last two years |
| <i>f_hunt2</i>                      | 0.95 | 0.57 | 1.18 | Whether the hunt crosses the farm                                     |
| <i>f_ibrvaccY</i>                   | 1.02 | 0.78 | 1.54 | Routine use of infectious bovine rhinotracheitis vaccination          |
| <i>f_injectmast</i>                 | 1.03 | 0.86 | 1.40 | Whether mastitis cases are routinely injected with antibiotic         |
| <i>f_leptovaccY</i>                 | 1.00 | 0.74 | 1.34 | Routine use of leptospirosis vaccination                              |
| <i>f_lime1</i>                      | 0.97 | 0.65 | 1.26 | Use of lime in milking cow housing                                    |
| <i>f_lungvaccY</i>                  | 0.94 | 0.53 | 1.19 | Routine vaccination against lungworm                                  |
| <i>f_machinery1</i>                 | 0.96 | 0.61 | 1.22 | Whether machinery was shared with other farms                         |
| <i>f_manure_1yes</i>                | 1.08 | 0.85 | 1.99 | Use of slurry lagoon                                                  |
| <i>f_manure_2yes</i>                | 1.03 | 0.80 | 1.65 | Use of a weeping wall for slurry management                           |
| <i>f_manure_3yes</i>                | 0.97 | 0.65 | 1.25 | Use of a metal slurry store                                           |
| <i>f_manure_4yes</i>                | 0.98 | 0.69 | 1.26 | Use of a concrete slurry store                                        |
| <i>f_manure_5yes</i>                | 0.97 | 0.61 | 1.23 | Muck heap in field used                                               |
| <i>f_manure_6yes</i>                | 0.99 | 0.71 | 1.28 | Use of muck heap on concrete                                          |
| <i>f_manure_7yes</i>                | 0.92 | 0.32 | 1.35 | Use of composter for muck management                                  |
| <i>f_manure_8yes</i>                | 1.03 | 0.74 | 1.67 | Use of separator for muck management                                  |
| <i>f_market1</i>                    | 1.01 | 0.76 | 1.44 | Whether cattle are taken to market regularly                          |
| <i>f_milkgraze1</i>                 | 1.02 | 0.76 | 1.58 | Whether milking cows graze                                            |
| <i>f_muckspreader3</i>              | 1.04 | 0.72 | 2.02 | Use of a contract muck spreader                                       |
| <i>f_nsaidcalve1</i>                | 0.98 | 0.69 | 1.26 | Routine use of anti-inflammatories at calving                         |
| <i>f_nsaiddiarr1</i>                | 0.97 | 0.62 | 1.30 | Routine use of anti-inflammatories in cases of calf diarrhoea         |
| <i>f_nsaidmast</i>                  | 0.99 | 0.80 | 1.18 | Routine use of anti-inflammatories in cases of mastitis               |
| <i>f_organic1</i>                   | 1.01 | 0.68 | 1.62 | Whether the farm is certified organic                                 |
| <i>f_othergrazeY</i>                | 0.91 | 0.44 | 1.16 | Use of grazing land away from the farm                                |
| <i>f_outsource1</i>                 | 0.86 | 0.26 | 1.23 | Whether heifer calves are reared by a different enterprise            |



|                                           |      |      |      |                                                                          |
|-------------------------------------------|------|------|------|--------------------------------------------------------------------------|
| <i>f_pattern2</i>                         | 1.12 | 0.84 | 2.66 | Calving pattern                                                          |
| <i>f_pheasant2</i>                        | 0.99 | 0.69 | 1.38 | Perceived amount of pheasants on farmland                                |
| <i>f_pigeon2</i>                          | 0.96 | 0.59 | 1.20 | Perceived level of pigeon infestation                                    |
| <i>f_pneum_vacc1</i>                      | 1.00 | 0.73 | 1.37 | Routine use of calf respiratory vaccination                              |
| <i>f_poultry1</i>                         | 1.03 | 0.82 | 1.55 | Presence of poultry on the farm                                          |
| <i>f_predip1</i>                          | 1.05 | 0.84 | 1.66 | Whether pre-dip is used when milking                                     |
| <i>f_premises2</i>                        | 1.01 | 0.74 | 1.45 | Number of farm premises                                                  |
| <i>f_rat2</i>                             | 1.02 | 0.79 | 1.43 | Perceived level of rat infestation on the farm                           |
| <i>f_rook2</i>                            | 0.94 | 0.52 | 1.20 | Perceived level of rook infestation on farm                              |
| <i>f_salmvaccY</i>                        | 0.85 | 0.20 | 1.23 | Routine vaccination against <i>Salmonella</i>                            |
| <i>f_scc</i>                              | 0.96 | 0.71 | 1.14 | Average herd somatic cell count                                          |
| <i>f_shoot2</i>                           | 0.99 | 0.70 | 1.29 | Whether the shoot crosses the farm                                       |
| <i>f_shows1</i>                           | 1.14 | 0.82 | 3.75 | Whether cattle from the farm are taken to shows                          |
| <i>f_starling2</i>                        | 0.98 | 0.69 | 1.26 | Perceived amount of starling infestation                                 |
| <i>f_time_dam.L</i>                       | 0.99 | 0.76 | 1.25 | Time calf spends with dam                                                |
| <i>f_timesfirstmast</i>                   | 1.02 | 0.88 | 1.28 | How often clinical mastitis cases were treated with intramammary tubes   |
| <i>f_total_cattle</i>                     | 0.99 | 0.78 | 1.20 | Total number of cattle on the farm                                       |
| <i>f_treatfoot1</i>                       | 0.99 | 0.72 | 1.31 | Use of a footbath for lameness outbreaks                                 |
| <i>f_trough_clean.L</i>                   | 0.88 | 0.47 | 1.10 | Daily cleaning of water troughs in calf housing                          |
| <i>f_um_spray1</i>                        | 0.98 | 0.64 | 1.33 | Routine use of umbilical treatment                                       |
| <i>f_water1</i>                           | 1.07 | 0.84 | 2.07 | Source of drinking water                                                 |
| <i>f_wean2</i>                            | 0.95 | 0.51 | 1.25 | Age of weaning                                                           |
| <i>f_wean3</i>                            | 1.12 | 0.86 | 2.48 |                                                                          |
| <i>f_whichclinrespMacrolide</i>           | 0.99 | 0.69 | 1.30 | Most commonly used antibiotic to treat calf pneumonia                    |
| <i>f_whichclinrespOtherDdontknow</i>      | 0.92 | 0.32 | 1.47 |                                                                          |
| <i>f_whichclinrespPenicillimoxycillin</i> | 0.93 | 0.31 | 1.39 |                                                                          |
| <i>f_whichclinrespTetracycline</i>        | 1.00 | 0.71 | 1.40 |                                                                          |
| <i>f_yield</i>                            | 1.02 | 0.85 | 1.32 | Average herd yield                                                       |
| <i>footpath1</i>                          | 0.90 | 0.41 | 1.16 | Sample collected from a public footpath                                  |
| <i>preweaned_heifer1</i>                  | 5.58 | 3.86 | 8.49 | Sample collected from the environment of a pre-weaned heifer             |
| <i>s_calving_now1</i>                     | 1.00 | 0.74 | 1.32 | Whether cows were calving during the month in which the sample was taken |
| <i>s_housed_outdooroutdoor</i>            | 0.50 | 0.22 | 1.02 | Sample collected from pastureland                                        |
| <i>s_rain</i>                             | 1.19 | 0.99 | 1.47 | Average monthly rainfall                                                 |
| <i>s_temp</i>                             | 1.71 | 1.42 | 2.05 | Average monthly temperature                                              |
| <i>weaned_heifer1</i>                     | 0.99 | 0.78 | 1.24 | Sample collected from the environment of a weaned heifer                 |
| <i>adult1</i>                             | 1.06 | 0.90 | 1.54 | Sample collected from the milking cow environment                        |

**Table S4:** Full details from Bayesian logistic regression models for non-cephalosporin resistance with odds ratios, 95% credible intervals and effective sample sizes. Tables are ordered by magnitude of effect size of the variables. A prefix 'main\_' indicates variables tested as the main variables with diffuse priors. A prefix 'reg\_' indicated regularised variables where a horseshoe prior was applied.

## Amoxicillin

| Variable                        | Odds ratio | Lower CI | Upper CI | Description                                                                            | Effective sample size |
|---------------------------------|------------|----------|----------|----------------------------------------------------------------------------------------|-----------------------|
| reg_s_housed_outdooroutdoor     | 0.27       | 0.2      | 0.37     | Sample collected from pasture                                                          | 16776                 |
| reg_preweaned_heifer1           | 1.99       | 1.29     | 2.98     | Sample collected from the environment of a pre-weaned heifer                           | 14162                 |
| main_s_temp                     | 1.91       | 1.57     | 2.35     | Average monthly temperature                                                            | 14045                 |
| main_total_mg_pcu               | 1.61       | 0.91     | 2.86     | Total antibiotic usage                                                                 | 11829                 |
| main_pen                        | 0.71       | 0.31     | 1.67     | Total usage of penicillin                                                              | 11046                 |
| main_co_amox                    | 1.24       | 0.82     | 1.92     | Total usage of amoxicillin-clavulanic acid                                             | 12507                 |
| reg_f_shows1                    | 1.17       | 0.92     | 3.31     | Whether animals are taken to shows                                                     | 5518                  |
| reg_f_firstmastitistdDmultiject | 1.17       | 0.95     | 2.22     | First line choice of mastitis treatment is streptomycin/neomycin/novobiocin/penicillin | 4957                  |
| main_strep                      | 0.88       | 0.7      | 1.11     | Total streptomycin usage                                                               | 12932                 |
| reg_f_lungvaccY                 | 0.89       | 0.54     | 1.06     | Routine use of lungworm vaccination                                                    | 8244                  |
| reg_f_foragetype_2yes           | 0.9        | 0.43     | 1.08     | Feeding of big bale grass silage                                                       | 8200                  |
| main_ceph_1                     | 0.91       | 0.63     | 1.31     | Total usage of first-generation cephalosporins                                         | 13338                 |
| main_fq                         | 1.1        | 0.85     | 1.43     | Total fluoroquinolone usage                                                            | 12700                 |
| main_amox                       | 1.08       | 0.78     | 1.47     | Total amoxicillin usage                                                                | 12016                 |
| reg_f_manure_4yes               | 0.93       | 0.61     | 1.06     | Use of a concrete slurry store                                                         | 10621                 |
| main_tet                        | 1.07       | 0.82     | 1.41     | Total tetracycline usage                                                               | 13366                 |
| reg_f_acf1                      | 0.93       | 0.61     | 1.07     | Use of automatic cluster flushing                                                      | 10392                 |
| reg_f_calf_housing_type3        | 0.94       | 0.61     | 1.07     | Type of calf housing                                                                   | 10640                 |
| reg_weaned_heifer1              | 0.94       | 0.68     | 1.06     | Sample collected from the environment of a weaned heifer                               | 14146                 |
| reg_weaned_heifer0              | 1.06       | 0.94     | 1.46     | Sample collected from the environment of a weaned heifer                               | 14252                 |
| reg_f_poultry1                  | 1.06       | 0.94     | 1.59     | Presence of poultry on the farm                                                        | 10856                 |
| reg_f_foragetype_3yes           | 1.06       | 0.93     | 1.64     | Maize silage used on farm                                                              | 11536                 |
| main_cefalexin                  | 0.95       | 0.68     | 1.32     | Total cefalexin usage                                                                  | 12769                 |
| reg_f_firstmastitisOrbeninLA    | 1.05       | 0.86     | 2.19     | First line choice of mastitis treatment is cloxacillin                                 | 12774                 |
| reg_f_lime1                     | 1.05       | 0.93     | 1.53     | Use of lime in milking cow housing                                                     | 12295                 |
| reg_f_bedmilk_1yes              | 0.95       | 0.66     | 1.08     | Use of sand in milking cow bedding                                                     | 11987                 |
| reg_f_firstmastitisUbrolexin    | 0.96       | 0.58     | 1.11     | First line choice of mastitis treatment is cefalexin/kanamycin                         | 13189                 |
| reg_f_manure_1yes               | 1.05       | 0.93     | 1.51     | Use of slurry lagoon                                                                   | 10583                 |
| reg_f_clostvaccY                | 0.96       | 0.64     | 1.1      | Routine use of clostridial vaccination                                                 | 13062                 |
| reg_f_salmvaccY                 | 0.96       | 0.58     | 1.13     | Routine use of <i>Salmonella</i> vaccination                                           | 11197                 |
| reg_f_predip1                   | 1.04       | 0.93     | 1.44     | Whether pre-dip is used when milking                                                   | 11247                 |
| reg_f_fox2                      | 0.96       | 0.71     | 1.08     | Perceived fox population on farm                                                       | 13343                 |
| reg_f_equine1                   | 1.04       | 0.92     | 1.42     | Presence of horses on the farm                                                         | 14623                 |
| reg_f_badger2                   | 1.04       | 0.9      | 1.55     | Perceived badger population on the farm                                                | 12196                 |
| reg_f_deer2                     | 0.97       | 0.68     | 1.09     | Perceived amount of deer on farmland                                                   | 11514                 |
| reg_s_calving_now1              | 1.03       | 0.93     | 1.38     | Sample collected during the calving season                                             | 13902                 |
| reg_f_manure_9yes               | 1.03       | 0.87     | 1.68     | Use of other manure management                                                         | 12921                 |
| reg_f_cleancluster.L            | 0.97       | 0.76     | 1.07     | How often the milking cluster was cleaned                                              | 13794                 |
| reg_f_foragetype_8yes           | 0.97       | 0.6      | 1.16     | Feeding of other forage                                                                | 14145                 |
| reg_f_nsaidmast                 | 0.97       | 0.8      | 1.05     | Routine use of anti-inflammatories in cases of mastitis                                | 12903                 |

|                                        |      |      |      |                                                                          |       |
|----------------------------------------|------|------|------|--------------------------------------------------------------------------|-------|
| reg_f_shoot2                           | 0.97 | 0.71 | 1.08 | Whether the shoot crosses the farm                                       | 10858 |
| reg_f_firstmastitisMastiplanLC         | 0.97 | 0.61 | 1.17 | First line choice of mastitis treatment is cefapirin                     | 15368 |
| reg_f_pattern2                         | 1.03 | 0.91 | 1.43 | Calving pattern                                                          | 13418 |
| reg_f_whichclinrespPenicillimoxycillin | 0.97 | 0.62 | 1.17 | First line choice of pneumonia treatment is amoxicillin                  | 14627 |
| reg_f_machinery1                       | 0.97 | 0.74 | 1.08 | Whether machinery was shared with other farms                            | 13809 |
| reg_f_anything_waste1                  | 1.03 | 0.92 | 1.35 | Whether waste milk was fed to any calves                                 | 14253 |
| reg_f_diarrvaccY                       | 0.97 | 0.74 | 1.09 | Routine use of calf enteric disease vaccination                          | 13367 |
| reg_f_percentdryoff                    | 1.03 | 0.95 | 1.22 | Proportion of cows dried off with antibiotic tubes                       | 13079 |
| reg_f_bedmilk_6yes                     | 1.03 | 0.86 | 1.54 | Use of green bedding for milking cows                                    | 13859 |
| reg_f_manure_3yes                      | 1.03 | 0.91 | 1.38 | Use of a metal slurry store                                              | 13836 |
| reg_f_othergrazeY                      | 0.97 | 0.75 | 1.08 | Use of grazing land away from the farm                                   | 13721 |
| reg_f_rook2                            | 1.03 | 0.91 | 1.34 | Perceived rook population on farm                                        | 13452 |
| reg_f_feedlorry1                       | 1.03 | 0.92 | 1.32 | Whether feed lorries crossed any cattle yards when delivering            | 14284 |
| reg_f_geographical_area2               | 1.02 | 0.92 | 1.32 | Geographical area 2                                                      | 13961 |
| reg_f_um_spray1                        | 1.02 | 0.9  | 1.37 | Routine use of umbilical treatment at birth                              | 13855 |
| reg_f_organic1                         | 0.98 | 0.71 | 1.13 | Whether the farm is organic                                              | 13493 |
| reg_f_manure_6yes                      | 1.02 | 0.92 | 1.29 | Use of muck heap on concrete                                             | 15221 |
| reg_f_daystreatmast                    | 1.02 | 0.94 | 1.21 | Number of days mastitis is treated for                                   | 15025 |
| reg_adult1                             | 1.02 | 0.92 | 1.25 | Sample collected from the milking cow environment                        | 15001 |
| reg_f_hostfarmwalk1                    | 1.02 | 0.91 | 1.29 | Whether a farm walk has taken place on the farm in the last two years    | 14356 |
| reg_f_bedmilk_2yes                     | 1.02 | 0.91 | 1.27 | Use of straw as milking cow bedding                                      | 14695 |
| reg_f_trough_clean.L                   | 1.02 | 0.93 | 1.22 | Daily cleaning of water troughs in calf housing                          | 13884 |
| reg_f_timesfirstmast                   | 0.98 | 0.85 | 1.06 | How often clinical mastitis cases were treated with intramammary tubes   | 14080 |
| reg_f_hectares                         | 0.98 | 0.85 | 1.06 | Size of farm in hectares                                                 | 13599 |
| reg_f_foragetype_4yes                  | 1.02 | 0.92 | 1.25 | Feeding of whole crop silage                                             | 14484 |
| reg_f_time_dam.L                       | 1.02 | 0.92 | 1.24 | Time calf spends with dam                                                | 13291 |
| reg_f_abcalve1                         | 1.02 | 0.89 | 1.31 | Routine use of antibiotics following a difficult calving                 | 13603 |
| reg_f_manure_7yes                      | 1.02 | 0.86 | 1.37 | Use of composter for muck management                                     | 15307 |
| reg_f_whichclinrespOtherDdontknow      | 1.02 | 0.84 | 1.42 | First line choice of pneumonia treatment is unknown                      | 15451 |
| reg_s_rain                             | 1.02 | 0.96 | 1.12 | Average monthly rainfall                                                 | 15328 |
| reg_f_yield                            | 1.02 | 0.93 | 1.18 | 305-day milk yield                                                       | 14634 |
| reg_f_foragetype_1yes                  | 1.02 | 0.87 | 1.33 | Feeding of clamp grass silage                                            | 15498 |
| reg_f_outsource1                       | 1.01 | 0.88 | 1.3  | Whether heifer calves are reared by a different enterprise               | 15180 |
| reg_f_firstmastitisCobactan            | 0.99 | 0.73 | 1.19 | First line choice of mastitis treatment is cefquinome                    | 14799 |
| reg_f_aiexternal1                      | 1.01 | 0.91 | 1.24 | Artificial insemination performed by external company                    | 14228 |
| reg_f_wean2                            | 0.99 | 0.79 | 1.13 | Age of weaning                                                           | 14301 |
| reg_f_hunt2                            | 0.99 | 0.81 | 1.1  | Whether the hunt crosses the farm                                        | 14843 |
| reg_f_bedmilk_8yes                     | 0.99 | 0.72 | 1.21 | Unknown milking cow bedding type                                         | 14857 |
| reg_f_halocur1                         | 1.01 | 0.9  | 1.23 | Routine use of treatment to prevent cryptosporidiosis                    | 15015 |
| reg_f_muckspreader3                    | 0.99 | 0.75 | 1.19 | Use of a contract muck spreader                                          | 15745 |
| reg_f_bedmilk_4yes                     | 1.01 | 0.84 | 1.35 | Use of paper waste for milking cow bedding                               | 14530 |
| reg_f_calf_housing_older1              | 0.99 | 0.8  | 1.12 | Whether calves have been kept near to older animals                      | 15647 |
| reg_f_foragetype_7yes                  | 0.99 | 0.81 | 1.12 | Feeding of haylage                                                       | 14456 |
| reg_f_calf_housing_type2               | 1.01 | 0.9  | 1.21 | Type of calf housing                                                     | 15435 |
| reg_f_injectmast                       | 0.99 | 0.85 | 1.09 | Whether mastitis cases are routinely injected with antibiotic            | 15577 |
| reg_f_nsaiddiarr1                      | 0.99 | 0.82 | 1.12 | Routine use of anti-inflammatories in cases of calf diarrhoea            | 14910 |
| reg_f_calving_group1                   | 1.01 | 0.87 | 1.25 | Whether calves were born in a group pen                                  | 14965 |
| reg_f_ibrvaccY                         | 0.99 | 0.82 | 1.11 | Routine use of IBR vaccination                                           | 15763 |
| reg_dry1                               | 0.99 | 0.83 | 1.11 | Sample collected from the dry cow environment                            | 15410 |
| reg_f_bought_pre                       | 1.01 | 0.93 | 1.14 | Number of cattle bought in the 12 months before the start of the project | 14805 |
| reg_f_foragetype_6yes                  | 1.01 | 0.87 | 1.26 | Feeding of straw                                                         | 15578 |

|                                 |      |      |      |                                                                    |       |
|---------------------------------|------|------|------|--------------------------------------------------------------------|-------|
| reg_f_drytrough.L               | 0.99 | 0.86 | 1.09 | How often the dry cow water trough was cleaned out                 | 14593 |
| reg_f_pneum_vacc1               | 1.01 | 0.89 | 1.21 | Routine use of calf respiratory vaccination                        | 15422 |
| reg_f_premises2                 | 0.99 | 0.84 | 1.12 | Number of farm premises                                            | 15055 |
| reg_f_market1                   | 0.99 | 0.83 | 1.13 | Whether animals are taken to market                                | 14304 |
| reg_f_geographical_area3        | 1.01 | 0.88 | 1.19 | Geographical area 3                                                | 15533 |
| reg_f_bdvaccY                   | 1.01 | 0.89 | 1.19 | Routine use of bovine viral diarrhoeavaccination                   | 14765 |
| reg_f_pheasant2                 | 1.01 | 0.87 | 1.22 | Perceived pheasant population on farm                              | 16033 |
| reg_f_fram_dct1                 | 0.99 | 0.84 | 1.13 | Use of framycetin dry cow therapy                                  | 15346 |
| reg_f_firstmastitisUbroYellow   | 0.99 | 0.82 | 1.14 | First line choice of mastitis treatment is streptomycin/framycetin | 15943 |
| reg_f_rat2                      | 1.01 | 0.89 | 1.19 | Perceived rat population on farm                                   | 15668 |
| reg_f_wean3                     | 0.99 | 0.85 | 1.12 | Age of weaning                                                     | 16139 |
| reg_footpath1                   | 1.01 | 0.89 | 1.19 | Sample collected from a public footpath                            | 14807 |
| reg_f_herd_size                 | 1.01 | 0.92 | 1.13 | Total milking cattle on farm                                       | 15719 |
| reg_f_manure_8yes               | 1.01 | 0.86 | 1.23 | Use of separator for muck management                               | 15645 |
| reg_f_heifers_waste1            | 1.01 | 0.88 | 1.19 | Whether waste milk has been fed to heifers                         | 16652 |
| reg_f_anticocc1                 | 0.99 | 0.84 | 1.13 | Routine use of anticoccidials                                      | 14850 |
| reg_f_manure_2yes               | 0.99 | 0.82 | 1.16 | Use of a weeping wall for slurry management                        | 15670 |
| reg_f_calveclean.L              | 0.99 | 0.86 | 1.12 | How often the calving pens are cleaned out                         | 15365 |
| reg_f_pigeon2                   | 1    | 0.89 | 1.16 | Perceived pigeon population on farm                                | 16287 |
| reg_f_total_cattle              | 1    | 0.91 | 1.13 | Total number of cattle on farm                                     | 15650 |
| reg_f_give_col1                 | 1    | 0.87 | 1.19 | Administration of colostrum within six hours of life               | 16275 |
| reg_f_starling2                 | 1    | 0.85 | 1.14 | Perceived amount of starling infestation                           | 15575 |
| reg_f_whichclinrespTetracycline | 1    | 0.84 | 1.15 | First line choice of pneumonia treatment is tetracycline           | 15426 |
| reg_f_clox_dct1                 | 1    | 0.84 | 1.15 | Use of cloxacillin dry cow therapy                                 | 14993 |
| reg_f_leptovaccY                | 1    | 0.85 | 1.16 | Routine use of leptospirosis vaccination                           | 15273 |
| reg_f_milkgraze1                | 1    | 0.84 | 1.17 | Whether milking cows graze                                         | 15249 |
| reg_f_manure_5yes               | 1    | 0.85 | 1.16 | Muck heap in field used                                            | 16334 |
| reg_f_water1                    | 1    | 0.87 | 1.17 | Water supply to the farm                                           | 16330 |
| reg_f_ceph_dct1                 | 1    | 0.87 | 1.18 | Use of cephalonium dry cow therapy                                 | 15314 |
| reg_f_nsaiddcalve1              | 1    | 0.87 | 1.14 | Routine use of anti-inflammatories at calving                      | 15448 |
| reg_f_whichclinrespMacrolide    | 1    | 0.86 | 1.14 | First line choice of pneumonia treatment is Macrolide              | 15614 |
| reg_f_cefq_dct1                 | 1    | 0.84 | 1.17 | Use of cefquinome dry cow therapy                                  | 15436 |
| reg_f_bedmilk_3yes              | 1    | 0.86 | 1.14 | Use of sawdust as milking cow bedding                              | 14504 |
| reg_f_muckspreader1             | 1    | 0.86 | 1.15 | Use of a contract muck spreader                                    | 15654 |
| reg_f_treatfoot1                | 1    | 0.87 | 1.14 | Use of a footbath for lameness outbreaks                           | 15255 |
| reg_f_foragetype_5yes           | 1    | 0.86 | 1.15 | Feeding of hay                                                     | 15969 |
| reg_f_scc                       | 1    | 0.91 | 1.09 | Somatic cell count                                                 | 15473 |

## Ciprofloxacin

| Variable                      | Odds ratio | Lower CI | Upper CI | Description                                                        | Effective sample size |
|-------------------------------|------------|----------|----------|--------------------------------------------------------------------|-----------------------|
| reg_preweaned_heifer1         | 4.13       | 2.79     | 6.46     | Sample collected from the environment of a pre-weaned heifer       | 15693                 |
| main_s_temp                   | 2.14       | 1.63     | 2.87     | Average monthly temperature                                        | 12028                 |
| reg_f_calf_housing_type3      | 0.69       | 0.25     | 1.07     | Type of calf housing                                               | 4232                  |
| main_fq                       | 1.43       | 1        | 2.06     | Total fluoroquinolone usage                                        | 10768                 |
| reg_f_firstmastitisUbroYellow | 0.73       | 0.23     | 1.09     | First line choice of mastitis treatment is streptomycin/framycetin | 7563                  |
| reg_weaned_heifer1            | 0.75       | 0.36     | 1.11     | Sample collected from the environment of a weaned heifer           | 6799                  |
| reg_weaned_heifer0            | 1.32       | 0.89     | 2.73     | Sample collected from the environment of a weaned heifer           | 6662                  |
| reg_f_manure_5yes             | 0.78       | 0.34     | 1.07     | Muck heap in field used                                            | 5482                  |
| reg_f_nsaiddiarr1             | 0.83       | 0.33     | 1.1      | Routine use of anti-inflammatories in cases of calf diarrhoea      | 6236                  |
| reg_f_foragetype_8yes         | 1.19       | 0.82     | 7.3      | Feeding of other forage                                            | 7416                  |
| reg_f_starling2               | 1.17       | 0.92     | 2.45     | Perceived amount of starling infestation                           | 6626                  |
| reg_f_um_spray1               | 1.17       | 0.88     | 3.45     | Routine use of umbilical treatment at birth                        | 6640                  |

|                                   |      |      |      |                                                                                        |       |
|-----------------------------------|------|------|------|----------------------------------------------------------------------------------------|-------|
| reg_f_badger2                     | 0.86 | 0.33 | 1.14 | Perceived badger population on the farm                                                | 6769  |
| reg_f_equine1                     | 1.15 | 0.92 | 2.26 | Presence of horses on the farm                                                         | 7623  |
| main_novobiocin                   | 1.15 | 0.82 | 1.61 | Total usage of novobiocin                                                              | 12967 |
| reg_s_rain                        | 1.14 | 0.99 | 1.4  | Average monthly rainfall                                                               | 11234 |
| reg_f_foragetype_6yes             | 0.89 | 0.37 | 1.15 | Feeding of straw                                                                       | 8766  |
| reg_f_calf_housing_older1         | 0.91 | 0.47 | 1.12 | Whether calves have been kept near to older animals                                    | 10059 |
| main_total_mg_pcu                 | 1.1  | 0.81 | 1.51 | Total antibiotic usage                                                                 | 10506 |
| reg_f_lime1                       | 0.92 | 0.48 | 1.14 | Use of lime in milking cow housing                                                     | 8800  |
| reg_f_geographical_area2          | 0.92 | 0.51 | 1.12 | Geographical area 2                                                                    | 10736 |
| reg_f_shows1                      | 0.92 | 0.39 | 1.19 | Whether animals are taken to shows                                                     | 9575  |
| reg_f_pneum_vacc1                 | 1.08 | 0.9  | 1.91 | Routine use of calf respiratory vaccination                                            | 10497 |
| reg_f_nsaidcalve1                 | 0.93 | 0.55 | 1.11 | Routine use of anti-inflammatories at calving                                          | 11633 |
| reg_f_daystreatmast               | 0.94 | 0.67 | 1.08 | Number of days mastitis is treated for                                                 | 7167  |
| main_ceph_3_4                     | 1.07 | 0.79 | 1.44 | Total usage of third- and fourth-generation cephalosporins                             | 13594 |
| reg_f_timesfirstmast              | 1.07 | 0.94 | 1.42 | How often clinical mastitis cases were treated with intramammary tubes                 | 11138 |
| reg_f_organic1                    | 1.07 | 0.82 | 2.29 | Whether the farm is organic                                                            | 12424 |
| reg_f_shoot2                      | 1.06 | 0.88 | 1.78 | Whether the shoot crosses the farm                                                     | 9954  |
| reg_f_poultry1                    | 0.94 | 0.58 | 1.13 | Presence of poultry on the farm                                                        | 10396 |
| reg_f_bedmilk_6yes                | 1.06 | 0.79 | 2.28 | Use of green bedding for milking cows                                                  | 12193 |
| reg_f_geographical_area3          | 1.06 | 0.88 | 1.69 | Geographical area 3                                                                    | 11375 |
| reg_f_deer2                       | 1.06 | 0.87 | 1.69 | Perceived amount of deer on farmland                                                   | 12957 |
| reg_f_fox2                        | 1.05 | 0.86 | 1.76 | Perceived fox population on farm                                                       | 7675  |
| reg_f_foragetype_3yes             | 0.95 | 0.58 | 1.15 | Maize silage used on farm                                                              | 10977 |
| reg_f_whichclinrespOtherDdontknow | 0.95 | 0.46 | 1.37 | First line choice of pneumonia treatment is unknown                                    | 13574 |
| reg_f_manure_7yes                 | 1.05 | 0.81 | 1.93 | Use of composter for muck management                                                   | 13782 |
| reg_f_foragetype_4yes             | 1.05 | 0.88 | 1.55 | Feeding of whole crop silage                                                           | 13965 |
| reg_f_manure_9yes                 | 0.96 | 0.49 | 1.28 | Use of other manure management                                                         | 13485 |
| reg_f_foragetype_7yes             | 1.04 | 0.85 | 1.66 | Feeding of haylage                                                                     | 11290 |
| reg_f_bedmilk_2yes                | 0.96 | 0.62 | 1.16 | Use of straw as milking cow bedding                                                    | 13291 |
| reg_f_bedmilk_4yes                | 1.04 | 0.78 | 1.96 | Use of paper waste for milking cow bedding                                             | 13598 |
| reg_f_calf_housing_type2          | 1.04 | 0.84 | 1.63 | Type of calf housing                                                                   | 12407 |
| reg_f_bedmilk_3yes                | 0.96 | 0.65 | 1.16 | Use of sawdust as milking cow bedding                                                  | 13805 |
| reg_f_clox_dct1                   | 1.04 | 0.86 | 1.55 | Use of cloxacillin dry cow therapy                                                     | 14131 |
| reg_f_market1                     | 0.96 | 0.66 | 1.15 | Whether animals are taken to market                                                    | 12646 |
| reg_f_hectares                    | 0.96 | 0.75 | 1.08 | Size of farm in hectares                                                               | 13697 |
| reg_f_wean2                       | 1.04 | 0.83 | 1.61 | Age of weaning                                                                         | 14120 |
| reg_adult1                        | 1.04 | 0.86 | 1.48 | Sample collected from the milking cow environment                                      | 13968 |
| reg_f_machinery1                  | 1.04 | 0.87 | 1.48 | Whether machinery was shared with other farms                                          | 14737 |
| reg_f_manure_6yes                 | 0.97 | 0.66 | 1.17 | Use of muck heap on concrete                                                           | 10417 |
| reg_f_nsaidmast                   | 0.97 | 0.77 | 1.1  | Routine use of anti-inflammatories in cases of mastitis                                | 14039 |
| reg_f_time_dam.L                  | 1.03 | 0.89 | 1.4  | Time calf spends with dam                                                              | 13189 |
| reg_f_whichclinrespTetracycline   | 1.03 | 0.84 | 1.5  | First line choice of pneumonia treatment is tetracycline                               | 14007 |
| reg_f_predip1                     | 1.03 | 0.85 | 1.48 | Whether pre-dip is used when milking                                                   | 14150 |
| reg_f_anything_waste1             | 1.03 | 0.85 | 1.47 | Whether waste milk was fed to any calves                                               | 13999 |
| reg_f_rat2                        | 1.03 | 0.86 | 1.45 | Perceived rat population on farm                                                       | 12527 |
| reg_f_drytrough.L                 | 1.03 | 0.88 | 1.35 | How often the dry cow water trough was cleaned out                                     | 13553 |
| reg_f_othergrazeY                 | 1.03 | 0.85 | 1.45 | Use of grazing land away from the farm                                                 | 14048 |
| reg_f_firstmastitistdDmultiject   | 1.03 | 0.84 | 1.49 | First line choice of mastitis treatment is streptomycin/neomycin/novobiocin/penicillin | 13907 |
| reg_f_salmvaccY                   | 0.97 | 0.6  | 1.31 | Routine use of <i>Salmonella</i> vaccination                                           | 14613 |
| reg_s_housed_outdooroutdoor       | 0.97 | 0.74 | 1.14 | Sample collected from pasture                                                          | 15477 |
| reg_f_bedmilk_1yes                | 1.03 | 0.84 | 1.47 | Use of sand in milking cow bedding                                                     | 14998 |
| reg_f_firstmastitisOrbeninLA      | 0.98 | 0.57 | 1.38 | First line choice of mastitis treatment is cloxacillin                                 | 14319 |
| reg_f_whichclinrespMacrolide      | 1.02 | 0.85 | 1.42 | First line choice of pneumonia treatment is macrolide                                  | 14843 |
| reg_f_foragetype_1yes             | 1.02 | 0.77 | 1.6  | Feeding of clamp grass silage                                                          | 14457 |

|                                        |      |      |      |                                                                          |       |
|----------------------------------------|------|------|------|--------------------------------------------------------------------------|-------|
| reg_f_bought_pre                       | 0.98 | 0.79 | 1.11 | Number of cattle bought in the 12 months before the start of the project | 14481 |
| reg_f_yield                            | 1.02 | 0.9  | 1.27 | 305-day milk yield                                                       | 13160 |
| reg_f_muckspreader1                    | 0.98 | 0.72 | 1.18 | Use of a contract muck spreader                                          | 14627 |
| reg_f_calveclean.L                     | 1.02 | 0.86 | 1.35 | How often the calving pens are cleaned out                               | 14038 |
| reg_f_halocur1                         | 0.98 | 0.72 | 1.18 | Routine use of treatment to prevent cryptosporidiosis                    | 15356 |
| reg_f_wean3                            | 1.02 | 0.83 | 1.42 | Age of weaning                                                           | 13750 |
| reg_f_manure_8yes                      | 0.98 | 0.66 | 1.26 | Use of separator for muck management                                     | 15110 |
| reg_f_manure_2yes                      | 0.98 | 0.68 | 1.23 | Use of a weeping wall for slurry management                              | 13636 |
| reg_f_cleancluster.L                   | 0.98 | 0.77 | 1.14 | How often the milking cluster was cleaned                                | 15715 |
| reg_f_firstmastitisCobactan            | 1.02 | 0.75 | 1.61 | First line choice of mastitis treatment is cefquinome                    | 14490 |
| reg_f_firstmastitisUbrolexin           | 0.98 | 0.66 | 1.27 | First line choice of mastitis treatment is cefalexin/kanamycin           | 15576 |
| reg_f_injectmast                       | 0.98 | 0.79 | 1.13 | Whether mastitis cases are routinely injected with antibiotic            | 14950 |
| reg_f_premises2                        | 0.98 | 0.72 | 1.19 | Number of farm premises                                                  | 13996 |
| reg_f_manure_1yes                      | 1.02 | 0.84 | 1.38 | Use of slurry lagoon                                                     | 15333 |
| reg_s_calving_now1                     | 1.02 | 0.85 | 1.36 | Sample collected during the calving season                               | 15832 |
| reg_f_scc                              | 0.98 | 0.79 | 1.12 | Somatic cell count                                                       | 13187 |
| reg_f_manure_3yes                      | 0.98 | 0.71 | 1.21 | Use of a metal slurry store                                              | 14400 |
| reg_f_hunt2                            | 0.98 | 0.71 | 1.21 | Whether the hunt crosses the farm                                        | 15981 |
| reg_f_rook2                            | 1.02 | 0.82 | 1.41 | Perceived rook population on farm                                        | 15432 |
| reg_f_percentdryoff                    | 0.98 | 0.82 | 1.11 | Proportion of cows dried off with antibiotic tubes                       | 13978 |
| reg_footpath1                          | 1.02 | 0.85 | 1.32 | Sample collected from a public footpath                                  | 15593 |
| reg_f_hostfarmwalk1                    | 1.02 | 0.83 | 1.36 | Whether a farm walk has taken place on the farm in the last two years    | 15339 |
| reg_f_clostvaccY                       | 0.98 | 0.71 | 1.23 | Routine use of clostridial vaccination                                   | 15736 |
| reg_f_manure_4yes                      | 0.98 | 0.76 | 1.18 | Use of a concrete slurry store                                           | 15247 |
| reg_f_heifers_waste1                   | 1.02 | 0.82 | 1.37 | Whether waste milk has been fed to heifers                               | 15220 |
| reg_f_foragetype_2yes                  | 1.01 | 0.8  | 1.41 | Feeding of big bale grass silage                                         | 15358 |
| reg_f_treatfoot1                       | 0.99 | 0.76 | 1.21 | Use of a footbath for lameness outbreaks                                 | 15499 |
| reg_f_pheasant2                        | 0.99 | 0.73 | 1.25 | Perceived pheasant population on farm                                    | 15243 |
| reg_f_lungvaccY                        | 1.01 | 0.83 | 1.32 | Routine use of lungworm vaccination                                      | 15349 |
| reg_f_feedlorry1                       | 0.99 | 0.76 | 1.22 | Whether feed lorries crossed any cattle yards when delivering            | 15026 |
| reg_f_leptovaccY                       | 1.01 | 0.81 | 1.36 | Routine use of leptospirosis vaccination                                 | 14451 |
| reg_f_calving_group1                   | 0.99 | 0.7  | 1.29 | Whether calves were born in a group pen                                  | 15731 |
| reg_f_bedmilk_8yes                     | 1.01 | 0.69 | 1.58 | Unknown milking cow bedding type                                         | 16431 |
| reg_f_outsource1                       | 0.99 | 0.72 | 1.28 | Whether heifer calves are reared by a different enterprise               | 16010 |
| reg_f_total_cattle                     | 0.99 | 0.82 | 1.16 | Total number of cattle on farm                                           | 14539 |
| reg_f_abcalve1                         | 1.01 | 0.78 | 1.37 | Routine use of antibiotics following a difficult calving                 | 14795 |
| reg_f_diarrvaccY                       | 0.99 | 0.77 | 1.21 | Routine use of calf enteric disease vaccination                          | 16283 |
| reg_f_anticocc1                        | 0.99 | 0.75 | 1.23 | Routine use of anticoccidials                                            | 14699 |
| reg_f_ceph_dct1                        | 1.01 | 0.81 | 1.33 | Use of cephalonium dry cow therapy                                       | 14106 |
| reg_f_give_col1                        | 0.99 | 0.76 | 1.24 | Administration of colostrum within six hours of life                     | 15443 |
| reg_f_pigeon2                          | 1.01 | 0.82 | 1.28 | Perceived pigeon population on farm                                      | 15848 |
| reg_f_trough_clean.L                   | 1.01 | 0.85 | 1.25 | Daily cleaning of water troughs in calf housing                          | 14505 |
| reg_f_herd_size                        | 1.01 | 0.86 | 1.22 | Total milking cattle on farm                                             | 15973 |
| reg_dry1                               | 0.99 | 0.77 | 1.24 | Sample collected from the dry cow environment                            | 16680 |
| reg_f_acf1                             | 1.01 | 0.81 | 1.31 | Use of automatic cluster flushing                                        | 16258 |
| reg_f_cefq_dct1                        | 0.99 | 0.75 | 1.26 | Use of cefquinome dry cow therapy                                        | 15543 |
| reg_f_pattern2                         | 1.01 | 0.8  | 1.32 | Calving pattern                                                          | 16463 |
| reg_f_milkgraze1                       | 1.01 | 0.77 | 1.38 | Whether milking cows graze                                               | 15393 |
| reg_f_whichclinrespPenicillimoxycillin | 0.99 | 0.64 | 1.45 | First line choice of pneumonia treatment is amoxicillin                  | 16502 |
| reg_f_firstmastitisMastiplanLC         | 0.99 | 0.64 | 1.45 | First line choice of mastitis treatment is cefapirin                     | 16583 |
| reg_f_bvdvaccY                         | 1.01 | 0.81 | 1.29 | Routine use of BVD vaccination                                           | 15891 |
| reg_f_water1                           | 1    | 0.81 | 1.28 | Water supply to the farm                                                 | 16726 |
| reg_f_ibrvaccY                         | 1    | 0.79 | 1.22 | Routine use of IBR vaccination                                           | 16969 |
| reg_f_foragetype_5yes                  | 1    | 0.79 | 1.32 | Feeding of hay                                                           | 16330 |

|                     |   |      |      |                                                       |       |
|---------------------|---|------|------|-------------------------------------------------------|-------|
| reg_f_muckspreader3 | 1 | 0.65 | 1.49 | Use of a contract muck spreader                       | 15633 |
| reg_f_aiexternal1   | 1 | 0.79 | 1.23 | Artificial insemination performed by external company | 15194 |
| reg_f_fram_dct1     | 1 | 0.79 | 1.27 | Use of framycetin dry cow therapy                     | 16268 |

## Streptomycin

| Variable                               | Odds ratio | Lower CI | Upper CI | Description                                                                            | Effective sample size |
|----------------------------------------|------------|----------|----------|----------------------------------------------------------------------------------------|-----------------------|
| reg_preweaned_heifer1                  | 1.95       | 1.46     | 2.51     | Sample collected from the environment of a pre-weaned heifer                           | 15464                 |
| reg_footpath1                          | 0.57       | 0.33     | 1.01     | Sample collected from a public footpath                                                | 8540                  |
| main_s_temp                            | 1.53       | 1.32     | 1.77     | Average monthly temperature                                                            | 13407                 |
| reg_s_housed_outdooroutdoor            | 0.75       | 0.44     | 1.03     | Sample collected from pasture                                                          | 8326                  |
| reg_s_calving_now1                     | 1.27       | 0.98     | 2        | Sample collected during the calving season                                             | 8738                  |
| reg_dry1                               | 1.16       | 0.97     | 1.79     | Sample collected from the dry cow environment                                          | 12817                 |
| reg_f_foragetype_3yes                  | 1.14       | 0.95     | 2.08     | Maize silage used on farm                                                              | 5522                  |
| reg_f_pneum_vacc1                      | 1.14       | 0.95     | 1.92     | Routine use of calf respiratory vaccination                                            | 6699                  |
| main_total_mg_pcu                      | 1.13       | 0.86     | 1.49     | Total antibiotic usage                                                                 | 12578                 |
| reg_f_abcalve1                         | 0.89       | 0.48     | 1.07     | Routine use of antibiotics following a difficult calving                               | 10026                 |
| main_cefalexin                         | 0.9        | 0.75     | 1.09     | Total cefalexin usage                                                                  | 12778                 |
| reg_f_wean2                            | 0.9        | 0.52     | 1.06     | Age of weaning                                                                         | 10638                 |
| reg_f_firstmastitisUbrolexin           | 0.91       | 0.44     | 1.09     | First line choice of mastitis treatment is cefalexin/kanamycin                         | 10314                 |
| main_tet                               | 1.09       | 0.89     | 1.34     | Total tetracycline usage                                                               | 12151                 |
| reg_f_cleancluster.L                   | 0.92       | 0.69     | 1.04     | How often the milking cluster was cleaned                                              | 11173                 |
| reg_f_foragetype_5yes                  | 1.08       | 0.94     | 1.65     | Feeding of hay                                                                         | 11173                 |
| reg_f_bedmilk_4yes                     | 1.07       | 0.89     | 2.5      | Use of paper waste for milking cow bedding                                             | 9850                  |
| reg_f_pheasant2                        | 1.06       | 0.93     | 1.69     | Perceived pheasant population on farm                                                  | 10567                 |
| reg_f_shows1                           | 1.06       | 0.91     | 1.79     | Whether animals are taken to shows                                                     | 12426                 |
| reg_f_halocur1                         | 0.95       | 0.66     | 1.07     | Routine use of treatment to prevent cryptosporidiosis                                  | 10267                 |
| reg_f_nsaidmast                        | 0.95       | 0.77     | 1.04     | Routine use of anti-inflammatories in cases of mastitis                                | 12851                 |
| reg_adult1                             | 0.95       | 0.73     | 1.04     | Sample collected from the milking cow environment                                      | 13692                 |
| reg_f_whichclinrespPenicillimoxycillin | 0.95       | 0.47     | 1.16     | First line choice of pneumonia treatment is amoxicillin                                | 12856                 |
| reg_f_firstmastitisMastiplanLC         | 0.95       | 0.48     | 1.15     | First line choice of mastitis treatment is cefapirin                                   | 12121                 |
| reg_f_organic1                         | 0.96       | 0.59     | 1.13     | Whether the farm is organic                                                            | 11453                 |
| reg_f_firstmastitistDmultiject         | 1.04       | 0.93     | 1.44     | First line choice of mastitis treatment is streptomycin/neomycin/novobiocin/penicillin | 12760                 |
| reg_f_ceph_dct1                        | 1.04       | 0.93     | 1.41     | Use of cephalonium dry cow therapy                                                     | 13189                 |
| reg_f_manure_3yes                      | 1.04       | 0.92     | 1.44     | Use of a metal slurry store                                                            | 10961                 |
| reg_f_milkgraze1                       | 1.04       | 0.91     | 1.5      | Whether milking cows graze                                                             | 10565                 |
| reg_f_foragetype_2yes                  | 0.96       | 0.67     | 1.1      | Feeding of big bale grass silage                                                       | 12546                 |
| reg_f_total_cattle                     | 1.04       | 0.96     | 1.26     | Total number of cattle on farm                                                         | 12890                 |
| reg_f_foragetype_8yes                  | 0.97       | 0.6      | 1.16     | Feeding of other forage                                                                | 13344                 |
| reg_f_geographical_area2               | 0.97       | 0.74     | 1.08     | Geographical area 2                                                                    | 13343                 |
| reg_f_whichclinrespTetracycline        | 0.97       | 0.72     | 1.08     | First line choice of pneumonia treatment is tetracycline                               | 13601                 |
| main_amox                              | 1.03       | 0.84     | 1.28     | Total amoxicillin usage                                                                | 12754                 |
| reg_f_cefq_dct1                        | 0.97       | 0.72     | 1.09     | Use of cefquinome dry cow therapy                                                      | 13947                 |
| reg_f_bvdvaccY                         | 1.03       | 0.93     | 1.35     | Routine use of BVD vaccination                                                         | 12468                 |
| reg_f_time_dam.L                       | 1.03       | 0.93     | 1.34     | Time calf spends with dam                                                              | 8561                  |
| reg_f_leptovaccY                       | 1.03       | 0.92     | 1.38     | Routine use of leptospirosis vaccination                                               | 11081                 |
| reg_f_heifers_waste1                   | 1.03       | 0.92     | 1.36     | Whether waste milk has been fed to heifers                                             | 10976                 |
| reg_f_rook2                            | 1.03       | 0.92     | 1.32     | Perceived rook population on farm                                                      | 14780                 |
| reg_f_muckspreader3                    | 0.97       | 0.65     | 1.16     | Use of a contract muck spreader                                                        | 14810                 |
| reg_f_foragetype_6yes                  | 1.03       | 0.89     | 1.43     | Feeding of straw                                                                       | 13953                 |
| reg_f_acf1                             | 0.98       | 0.76     | 1.1      | Use of automatic cluster flushing                                                      | 14077                 |
| reg_f_calf_housing_type2               | 0.98       | 0.79     | 1.08     | Type of calf housing                                                                   | 14890                 |
| reg_f_aiexternal1                      | 1.02       | 0.93     | 1.28     | Artificial insemination performed by external company                                  | 14294                 |

|                              |      |      |      |                                                                          |       |
|------------------------------|------|------|------|--------------------------------------------------------------------------|-------|
| reg_f_fram_dct1              | 0.98 | 0.76 | 1.09 | Use of framycetin dry cow therapy                                        | 12804 |
| reg_f_calveclean.L           | 1.02 | 0.93 | 1.27 | How often the calving pens are cleaned out                               | 14198 |
| reg_f_othergrazeY            | 0.98 | 0.78 | 1.09 | Use of grazing land away from the farm                                   | 14255 |
| reg_f_herd_size              | 1.02 | 0.94 | 1.2  | Total milking cattle on farm                                             | 15398 |
| reg_f_foragetype_1yes        | 1.02 | 0.88 | 1.37 | Feeding of clamp grass silage                                            | 14665 |
| reg_f_scc                    | 0.98 | 0.85 | 1.05 | Somatic cell count                                                       | 15049 |
| reg_f_clostvaccY             | 1.02 | 0.9  | 1.27 | Routine use of clostridial vaccination                                   | 14789 |
| reg_f_trough_clean.L         | 1.02 | 0.93 | 1.2  | Daily cleaning of water troughs in calf housing                          | 14231 |
| reg_f_starling2              | 1.02 | 0.91 | 1.24 | Perceived amount of starling infestation                                 | 14589 |
| reg_f_equine1                | 0.98 | 0.81 | 1.1  | Presence of horses on the farm                                           | 13757 |
| reg_f_whichclinrespMacrolide | 0.98 | 0.82 | 1.09 | First line choice of pneumonia treatment is macrolide                    | 14467 |
| reg_f_calving_group1         | 1.02 | 0.89 | 1.29 | Whether calves were born in a group pen                                  | 14737 |
| reg_f_foragetype_4yes        | 0.99 | 0.83 | 1.09 | Feeding of whole crop silage                                             | 14526 |
| reg_f_daystreatmast          | 1.01 | 0.94 | 1.15 | Number of days mastitis is treated for                                   | 14779 |
| reg_f_machinery1             | 1.01 | 0.91 | 1.22 | Whether machinery was shared with other farms                            | 15002 |
| reg_f_percentdryoff          | 1.01 | 0.95 | 1.14 | Proportion of cows dried off with antibiotic tubes                       | 15287 |
| reg_f_manure_1yes            | 0.99 | 0.82 | 1.1  | Use of slurry lagoon                                                     | 12786 |
| reg_f_feedlorry1             | 0.99 | 0.82 | 1.1  | Whether feed lorries crossed any cattle yards when delivering            | 15377 |
| reg_f_manure_6yes            | 1.01 | 0.9  | 1.22 | Use of muck heap on concrete                                             | 13867 |
| reg_f_bedmilk_8yes           | 0.99 | 0.74 | 1.21 | Unknown milking cow bedding type                                         | 14951 |
| reg_f_pigeon2                | 1.01 | 0.91 | 1.19 | Perceived pigeon population on farm                                      | 15008 |
| reg_f_manure_4yes            | 1.01 | 0.91 | 1.19 | Use of a concrete slurry store                                           | 15383 |
| reg_f_deer2                  | 1.01 | 0.9  | 1.22 | Perceived amount of deer on farmland                                     | 15014 |
| main_strep                   | 1.01 | 0.84 | 1.22 | Total streptomycin usage                                                 | 12830 |
| reg_f_predip1                | 1.01 | 0.92 | 1.19 | Whether pre-dip is used when milking                                     | 15077 |
| reg_f_pattern2               | 0.99 | 0.81 | 1.12 | Calving pattern                                                          | 13256 |
| reg_f_geographical_area3     | 1.01 | 0.9  | 1.21 | Geographical area 3                                                      | 14418 |
| reg_f_um_spray1              | 1.01 | 0.88 | 1.23 | Routine use of umbilical treatment at birth                              | 15700 |
| reg_f_salmvaccY              | 1.01 | 0.85 | 1.31 | Routine use of Salmonella vaccination                                    | 14891 |
| reg_f_bedmilk_1yes           | 0.99 | 0.83 | 1.11 | Use of sand in milking cow bedding                                       | 14669 |
| reg_f_lungvaccY              | 1.01 | 0.9  | 1.19 | Routine use of lungworm vaccination                                      | 14451 |
| reg_weaned_heifer1           | 1.01 | 0.9  | 1.18 | Sample collected from the environment of a weaned heifer                 | 14119 |
| reg_weaned_heifer0           | 0.99 | 0.85 | 1.1  | Sample collected from the environment of a weaned heifer                 | 14629 |
| reg_f_yield                  | 1.01 | 0.93 | 1.14 | 305-day milk yield                                                       | 14481 |
| reg_f_premises2              | 0.99 | 0.84 | 1.11 | Number of farm premises                                                  | 14509 |
| reg_f_badger2                | 0.99 | 0.81 | 1.14 | Perceived badger population on the farm                                  | 14838 |
| reg_f_anticocc1              | 1.01 | 0.89 | 1.2  | Routine use of anticoccidials                                            | 15149 |
| reg_f_bought_pre             | 1.01 | 0.93 | 1.13 | Number of cattle bought in the 12 months before the start of the project | 16151 |
| reg_s_rain                   | 1.01 | 0.97 | 1.08 | Average monthly rainfall                                                 | 15991 |
| reg_f_ibrvaccY               | 1.01 | 0.9  | 1.19 | Routine use of IBR vaccination                                           | 15637 |
| reg_f_firstmastitisCobactan  | 0.99 | 0.78 | 1.19 | First line choice of mastitis treatment is cefquinome                    | 14987 |
| reg_f_nsaidcalve1            | 1.01 | 0.9  | 1.18 | Routine use of anti-inflammatories at calving                            | 14262 |
| reg_f_rat2                   | 1.01 | 0.9  | 1.18 | Perceived rat population on farm                                         | 14971 |
| reg_f_diarrvaccY             | 1.01 | 0.9  | 1.18 | Routine use of calf enteric disease vaccination                          | 15340 |
| reg_f_nsaiddiarr1            | 1.01 | 0.89 | 1.19 | Routine use of anti-inflammatories in cases of calf diarrhoea            | 15850 |
| reg_f_manure_2yes            | 1.01 | 0.88 | 1.21 | Use of a weeping wall for slurry management                              | 14431 |
| reg_f_drytrough.L            | 0.99 | 0.87 | 1.09 | How often the dry cow water trough was cleaned out                       | 14578 |
| reg_f_injectmast             | 0.99 | 0.87 | 1.09 | Whether mastitis cases are routinely injected with antibiotic            | 14922 |
| reg_f_wean3                  | 0.99 | 0.85 | 1.12 | Age of weaning                                                           | 15060 |
| reg_f_give_col1              | 1.01 | 0.89 | 1.18 | Administration of colostrum within six hours of life                     | 14275 |
| reg_f_shoot2                 | 1.01 | 0.88 | 1.19 | Whether the shoot crosses the farm                                       | 14900 |
| reg_f_bedmilk_2yes           | 1.01 | 0.89 | 1.18 | Use of straw as milking cow bedding                                      | 15338 |
| reg_f_treatfoot1             | 1.01 | 0.9  | 1.17 | Use of a footbath for lameness outbreaks                                 | 14794 |
| reg_f_manure_8yes            | 1.01 | 0.86 | 1.23 | Use of separator for muck management                                     | 16202 |



|                                   |      |      |      |                                                                        |       |
|-----------------------------------|------|------|------|------------------------------------------------------------------------|-------|
| reg_f_whichclinrespOtherDdontknow | 0.99 | 0.77 | 1.22 | First line choice of pneumonia treatment is unknown                    | 16004 |
| reg_f_manure_9yes                 | 1.01 | 0.84 | 1.26 | Use of other manure management                                         | 15507 |
| reg_f_firstmastitisOrbeninLA      | 1.01 | 0.81 | 1.3  | First line choice of mastitis treatment is cloxacillin                 | 15499 |
| reg_f_muckspreader1               | 1.01 | 0.89 | 1.17 | Use of a contract muck spreader                                        | 15809 |
| reg_f_foragetype_7yes             | 1.01 | 0.88 | 1.18 | Feeding of haylage                                                     | 15916 |
| reg_f_poultry1                    | 1.01 | 0.89 | 1.18 | Presence of poultry on the farm                                        | 13463 |
| main_fq                           | 1    | 0.81 | 1.24 | Total fluoroquinolone usage                                            | 12370 |
| reg_f_hectares                    | 1    | 0.93 | 1.1  | Size of farm in hectares                                               | 15000 |
| reg_f_anything_waste1             | 1    | 0.86 | 1.13 | Whether waste milk was fed to any calves                               | 16071 |
| reg_f_manure_7yes                 | 1    | 0.83 | 1.25 | Use of composter for muck management                                   | 15095 |
| reg_f_bedmilk_3yes                | 1    | 0.87 | 1.12 | Use of sawdust as milking cow bedding                                  | 15988 |
| reg_f_timesfirstmast              | 1    | 0.91 | 1.08 | How often clinical mastitis cases were treated with intramammary tubes | 15557 |
| reg_f_manure_5yes                 | 1    | 0.86 | 1.13 | Muck heap in field used                                                | 16106 |
| reg_f_outsource1                  | 1    | 0.83 | 1.17 | Whether heifer calves are reared by a different enterprise             | 15346 |
| reg_f_hunt2                       | 1    | 0.89 | 1.15 | Whether the hunt crosses the farm                                      | 15077 |
| reg_f_calf_housing_type3          | 1    | 0.86 | 1.13 | Type of calf housing                                                   | 16222 |
| reg_f_hostfarmwalk1               | 1    | 0.88 | 1.17 | Whether a farm walk has taken place on the farm in the last two years  | 15878 |
| reg_f_water1                      | 1    | 0.85 | 1.14 | Water supply to the farm                                               | 15786 |
| reg_f_clox_dct1                   | 1    | 0.86 | 1.15 | Use of cloxacillin dry cow therapy                                     | 14865 |
| reg_f_lime1                       | 1    | 0.88 | 1.15 | Use of lime in milking cow housing                                     | 15821 |
| reg_f_firstmastitisUbroYellow     | 1    | 0.87 | 1.17 | First line choice of mastitis treatment is streptomycin/framycetin     | 14361 |
| reg_f_fox2                        | 1    | 0.87 | 1.14 | Perceived fox population on farm                                       | 15965 |
| reg_f_calf_housing_older1         | 1    | 0.87 | 1.16 | Whether calves have been kept near to older animals                    | 14803 |
| reg_f_market1                     | 1    | 0.87 | 1.15 | Whether animals are taken to market                                    | 16430 |
| reg_f_bedmilk_6yes                | 1    | 0.8  | 1.26 | Use of green bedding for milking cows                                  | 15380 |

## Tetracycline

| Variable                        | Odds ratio | Lower CI | Upper CI | Description                                                                            | Effective sample size |
|---------------------------------|------------|----------|----------|----------------------------------------------------------------------------------------|-----------------------|
| reg_s_housed_outdooroutdoor     | 0.24       | 0.15     | 0.35     | Sample collected from pasture                                                          | 14783                 |
| reg_preweaned_heifer1           | 3.39       | 2        | 5.82     | Sample collected from the environment of a pre-weaned heifer                           | 16320                 |
| reg_f_foragetype_3yes           | 2.15       | 0.98     | 4.53     | Maize silage used on farm                                                              | 5799                  |
| reg_s_calving_now1              | 2.02       | 1.1      | 3.29     | Sample collected during the calving season                                             | 11454                 |
| main_s_temp                     | 1.98       | 1.55     | 2.55     | Average monthly temperature                                                            | 11857                 |
| reg_f_foragetype_2yes           | 0.67       | 0.22     | 1.09     | Feeding of big bale grass silage                                                       | 7025                  |
| main_total_mg_pcu               | 1.47       | 1.01     | 2.13     | Total antibiotic usage                                                                 | 10534                 |
| reg_f_calf_housing_older1       | 0.74       | 0.38     | 1.06     | Whether calves have been kept near to older animals                                    | 9125                  |
| reg_dry1                        | 0.74       | 0.42     | 1.05     | Sample collected from the dry cow environment                                          | 12095                 |
| main_strep                      | 0.76       | 0.6      | 0.97     | Total streptomycin usage                                                               | 10355                 |
| reg_s_rain                      | 1.26       | 1.08     | 1.47     | Average monthly rainfall                                                               | 15742                 |
| reg_weaned_heifer1              | 1.26       | 0.87     | 2.27     | Sample collected from the environment of a weaned heifer                               | 9246                  |
| reg_weaned_heifer0              | 0.8        | 0.44     | 1.15     | Sample collected from the environment of a weaned heifer                               | 9151                  |
| main_amox                       | 0.83       | 0.6      | 1.15     | Total amoxicillin usage                                                                | 10154                 |
| reg_f_calf_housing_type3        | 0.84       | 0.43     | 1.1      | Type of calf housing                                                                   | 10060                 |
| reg_f_manure_7yes               | 1.18       | 0.83     | 3.86     | Use of composter for muck management                                                   | 10262                 |
| reg_f_lime1                     | 1.18       | 0.92     | 2.14     | Use of lime in milking cow housing                                                     | 9542                  |
| reg_f_yield                     | 1.17       | 0.96     | 1.76     | 305-day milk yield                                                                     | 6215                  |
| reg_footpath1                   | 1.15       | 0.91     | 2.02     | Sample collected from a public footpath                                                | 13684                 |
| reg_f_geographical_area2        | 1.14       | 0.91     | 2.05     | Geographical area 2                                                                    | 10536                 |
| reg_f_calf_housing_type2        | 1.13       | 0.9      | 1.93     | Type of calf housing                                                                   | 10850                 |
| reg_f_clostvaccY                | 1.12       | 0.88     | 2.05     | Routine use of clostridial vaccination                                                 | 12058                 |
| reg_f_firstmastitistdDmultiject | 1.11       | 0.89     | 1.86     | First line choice of mastitis treatment is streptomycin/neomycin/novobiocin/penicillin | 11310                 |
| reg_f_shows1                    | 1.1        | 0.84     | 2.21     | Whether animals are taken to shows                                                     | 12045                 |

|                                        |      |      |      |                                                                          |       |
|----------------------------------------|------|------|------|--------------------------------------------------------------------------|-------|
| reg_f_bedmilk_8yes                     | 0.91 | 0.33 | 1.29 | Unknown milking cow bedding type                                         | 12577 |
| reg_f_equine1                          | 1.1  | 0.9  | 1.74 | Presence of horses on the farm                                           | 11693 |
| reg_f_firstmastitisUbrolexin           | 0.92 | 0.45 | 1.19 | First line choice of mastitis treatment is cefalexin/kanamycin           | 11084 |
| reg_f_bedmilk_2yes                     | 1.09 | 0.89 | 1.82 | Use of straw as milking cow bedding                                      | 12136 |
| reg_f_foragetype_7yes                  | 0.92 | 0.55 | 1.14 | Feeding of haylage                                                       | 13396 |
| reg_f_salmvaccY                        | 1.08 | 0.78 | 2.46 | Routine use of <i>Salmonella</i> vaccination                             | 11949 |
| reg_f_manure_4yes                      | 0.92 | 0.62 | 1.12 | Use of a concrete slurry store                                           | 12254 |
| reg_f_whichclinrespPenicillimoxycillin | 0.92 | 0.35 | 1.31 | First line choice of pneumonia treatment is amoxicillin                  | 13006 |
| reg_f_firstmastitisMastiplanLC         | 0.92 | 0.37 | 1.34 | First line choice of mastitis treatment is cefapirin                     | 11972 |
| reg_f_treatfoot1                       | 1.07 | 0.88 | 1.65 | Use of a footbath for lameness outbreaks                                 | 12678 |
| reg_f_percentdryoff                    | 1.07 | 0.95 | 1.34 | Proportion of cows dried off with antibiotic tubes                       | 13056 |
| reg_f_ceph_dct1                        | 0.93 | 0.61 | 1.13 | Use of cephalonium dry cow therapy                                       | 11352 |
| reg_f_foragetype_5yes                  | 1.07 | 0.88 | 1.66 | Feeding of hay                                                           | 13979 |
| reg_f_water1                           | 1.07 | 0.87 | 1.67 | Water supply to the farm                                                 | 12733 |
| reg_f_hunt2                            | 1.07 | 0.88 | 1.61 | Whether the hunt crosses the farm                                        | 13310 |
| reg_f_cefq_dct1                        | 1.06 | 0.85 | 1.72 | Use of cefquinome dry cow therapy                                        | 13318 |
| reg_f_hectares                         | 1.06 | 0.94 | 1.33 | Size of farm in hectares                                                 | 12996 |
| reg_f_firstmastitisCobactan            | 0.94 | 0.47 | 1.3  | First line choice of mastitis treatment is cefquinome                    | 14092 |
| reg_f_give_col1                        | 1.06 | 0.86 | 1.62 | Administration of colostrum within six hours of life                     | 13436 |
| reg_f_foragetype_8yes                  | 0.95 | 0.47 | 1.33 | Feeding of other forage                                                  | 14021 |
| reg_f_pattern2                         | 0.95 | 0.59 | 1.19 | Calving pattern                                                          | 13079 |
| reg_f_wean3                            | 0.95 | 0.66 | 1.15 | Age of weaning                                                           | 13309 |
| reg_f_bought_pre                       | 0.95 | 0.76 | 1.09 | Number of cattle bought in the 12 months before the start of the project | 13511 |
| reg_f_machinery1                       | 1.05 | 0.86 | 1.51 | Whether machinery was shared with other farms                            | 13494 |
| reg_f_anything_waste1                  | 0.95 | 0.66 | 1.16 | Whether waste milk was fed to any calves                                 | 13856 |
| reg_f_injectmast                       | 1.05 | 0.9  | 1.38 | Whether mastitis cases are routinely injected with antibiotic            | 13948 |
| reg_f_foragetype_4yes                  | 1.05 | 0.87 | 1.45 | Feeding of whole crop silage                                             | 14290 |
| main_cefalexin                         | 1.05 | 0.75 | 1.46 | Total cefalexin usage                                                    | 9197  |
| reg_f_poultry1                         | 1.05 | 0.86 | 1.51 | Presence of poultry on the farm                                          | 13159 |
| reg_f_muckspreader3                    | 0.96 | 0.5  | 1.39 | Use of a contract muck spreader                                          | 14964 |
| reg_f_cleancluster.L                   | 0.96 | 0.74 | 1.12 | How often the milking cluster was cleaned                                | 14549 |
| reg_f_ibrvaccY                         | 1.04 | 0.85 | 1.49 | Routine use of IBR vaccination                                           | 13355 |
| reg_f_time_dam.L                       | 1.04 | 0.84 | 1.46 | Time calf spends with dam                                                | 11342 |
| reg_f_anticocc1                        | 1.04 | 0.84 | 1.51 | Routine use of anticoccidials                                            | 14568 |
| reg_f_predip1                          | 1.04 | 0.86 | 1.42 | Whether pre-dip is used when milking                                     | 14122 |
| reg_f_shoot2                           | 0.96 | 0.69 | 1.17 | Whether the shoot crosses the farm                                       | 14314 |
| reg_f_firstmastitisUbroYellow          | 1.04 | 0.84 | 1.51 | First line choice of mastitis treatment is streptomycin/framycetin       | 15162 |
| reg_f_muckspreader1                    | 1.04 | 0.84 | 1.49 | Use of a contract muck spreader                                          | 14473 |
| reg_f_manure_9yes                      | 1.04 | 0.74 | 1.8  | Use of other manure management                                           | 14351 |
| reg_f_pneum_vacc1                      | 1.04 | 0.85 | 1.45 | Routine use of calf respiratory vaccination                              | 14655 |
| reg_f_badger2                          | 1.04 | 0.8  | 1.59 | Perceived badger population on the farm                                  | 13939 |
| reg_f_manure_8yes                      | 1.03 | 0.79 | 1.61 | Use of separator for muck management                                     | 14545 |
| reg_f_rook2                            | 1.03 | 0.85 | 1.44 | Perceived rook population on farm                                        | 15600 |
| reg_f_whichclinrespTetracycline        | 1.03 | 0.83 | 1.49 | First line choice of pneumonia treatment is tetracycline                 | 14297 |
| reg_f_nsaidcalve1                      | 0.97 | 0.71 | 1.16 | Routine use of anti-inflammatories at calving                            | 14669 |
| reg_f_manure_5yes                      | 0.97 | 0.69 | 1.19 | Muck heap in field used                                                  | 15226 |
| reg_f_hostfarmwalk1                    | 1.03 | 0.84 | 1.44 | Whether a farm walk has taken place on the farm in the last two years    | 14724 |
| reg_f_firstmastitisOrbeninLA           | 0.97 | 0.52 | 1.44 | First line choice of mastitis treatment is cloxacillin                   | 16658 |
| reg_f_wean2                            | 0.97 | 0.65 | 1.24 | Age of weaning                                                           | 12976 |
| reg_f_market1                          | 1.03 | 0.84 | 1.43 | Whether animals are taken to market                                      | 14828 |
| reg_f_calveclean.L                     | 1.03 | 0.86 | 1.36 | How often the calving pens are cleaned out                               | 14240 |
| reg_f_manure_6yes                      | 1.03 | 0.85 | 1.43 | Use of muck heap on concrete                                             | 12981 |
| reg_f_abcalve1                         | 1.03 | 0.8  | 1.54 | Routine use of antibiotics following a difficult calving                 | 15179 |

|                                   |      |      |      |                                                                        |       |
|-----------------------------------|------|------|------|------------------------------------------------------------------------|-------|
| reg_f_total_cattle                | 1.03 | 0.88 | 1.29 | Total number of cattle on farm                                         | 15234 |
| reg_f_bedmilk_1yes                | 0.97 | 0.69 | 1.22 | Use of sand in milking cow bedding                                     | 14603 |
| reg_f_feedlorry1                  | 0.97 | 0.71 | 1.19 | Whether feed lorries crossed any cattle yards when delivering          | 14536 |
| reg_f_herd_size                   | 1.03 | 0.88 | 1.3  | Total milking cattle on farm                                           | 15734 |
| reg_f_leptovaccY                  | 0.97 | 0.7  | 1.22 | Routine use of leptospirosis vaccination                               | 14241 |
| reg_f_whichclinrespOtherDdontknow | 1.03 | 0.71 | 1.81 | First line choice of pneumonia treatment is unknown                    | 15240 |
| reg_f_bedmilk_6yes                | 0.97 | 0.58 | 1.39 | Use of green bedding for milking cows                                  | 14250 |
| reg_f_pigeon2                     | 0.98 | 0.74 | 1.17 | Perceived pigeon population on farm                                    | 15773 |
| reg_f_calving_group1              | 1.02 | 0.78 | 1.52 | Whether calves were born in a group pen                                | 14519 |
| reg_f_manure_2yes                 | 0.98 | 0.69 | 1.25 | Use of a weeping wall for slurry management                            | 15317 |
| reg_f_organic1                    | 0.98 | 0.61 | 1.38 | Whether the farm is organic                                            | 14649 |
| reg_f_um_spray1                   | 0.98 | 0.69 | 1.26 | Routine use of umbilical treatment at birth                            | 14147 |
| reg_f_fox2                        | 0.98 | 0.74 | 1.21 | Perceived fox population on farm                                       | 15565 |
| reg_f_clox_dct1                   | 0.98 | 0.71 | 1.23 | Use of cloxacillin dry cow therapy                                     | 14750 |
| reg_f_othergrazeY                 | 0.98 | 0.73 | 1.21 | Use of grazing land away from the farm                                 | 14461 |
| reg_f_whichclinrespMacrolide      | 1.02 | 0.83 | 1.34 | First line choice of pneumonia treatment is Macrolide                  | 15840 |
| reg_f_fram_dct1                   | 1.02 | 0.81 | 1.39 | Use of framycetin dry cow therapy                                      | 13613 |
| reg_f_timesfirstmast              | 1.02 | 0.89 | 1.23 | How often clinical mastitis cases were treated with intramammary tubes | 12810 |
| reg_f_scc                         | 0.98 | 0.84 | 1.11 | Somatic cell count                                                     | 15570 |
| reg_f_trough_clean.L              | 1.02 | 0.86 | 1.25 | Daily cleaning of water troughs in calf housing                        | 14955 |
| reg_f_deer2                       | 1.02 | 0.81 | 1.37 | Perceived amount of deer on farmland                                   | 15528 |
| reg_f_nsaiddiarr1                 | 1.01 | 0.82 | 1.34 | Routine use of anti-inflammatories in cases of calf diarrhoea          | 15523 |
| reg_f_acf1                        | 0.99 | 0.76 | 1.22 | Use of automatic cluster flushing                                      | 16112 |
| reg_f_heifers_waste1              | 0.99 | 0.73 | 1.25 | Whether waste milk has been fed to heifers                             | 14992 |
| reg_f_manure_3yes                 | 0.99 | 0.74 | 1.24 | Use of a metal slurry store                                            | 15682 |
| reg_f_daystreatmast               | 1.01 | 0.87 | 1.21 | Number of days mastitis is treated for                                 | 16019 |
| reg_f_rat2                        | 1.01 | 0.82 | 1.3  | Perceived rat population on farm                                       | 15792 |
| reg_f_nsaidmast                   | 1.01 | 0.88 | 1.2  | Routine use of anti-inflammatories in cases of mastitis                | 15387 |
| reg_f_halocur1                    | 0.99 | 0.77 | 1.24 | Routine use of treatment to prevent cryptosporidiosis                  | 15260 |
| reg_f_manure_1yes                 | 1.01 | 0.81 | 1.33 | Use of slurry lagoon                                                   | 14497 |
| reg_f_pheasant2                   | 0.99 | 0.72 | 1.29 | Perceived pheasant population on farm                                  | 14788 |
| reg_adult1                        | 1.01 | 0.79 | 1.31 | Sample collected from the milking cow environment                      | 14004 |
| reg_f_drytrough.L                 | 1.01 | 0.85 | 1.22 | How often the dry cow water trough was cleaned out                     | 16126 |
| reg_f_bvdvaccY                    | 1.01 | 0.79 | 1.33 | Routine use of BVD vaccination                                         | 13955 |
| reg_f_lungvaccY                   | 0.99 | 0.77 | 1.24 | Routine use of lungworm vaccination                                    | 15196 |
| reg_f_foragetype_1yes             | 1.01 | 0.72 | 1.44 | Feeding of clamp grass silage                                          | 15213 |
| reg_f_diarrvaccY                  | 1.01 | 0.8  | 1.28 | Routine use of calf enteric disease vaccination                        | 15370 |
| reg_f_geographical_area3          | 1    | 0.76 | 1.3  | Geographical area 3                                                    | 14587 |
| reg_f_premises2                   | 1    | 0.79 | 1.29 | Number of farm premises                                                | 15374 |
| reg_f_starling2                   | 1    | 0.79 | 1.29 | Perceived amount of starling infestation                               | 15983 |
| main_fq                           | 1    | 0.67 | 1.42 | Total fluoroquinolone usage                                            | 7315  |
| reg_f_milkgraze1                  | 1    | 0.75 | 1.37 | Whether milking cows graze                                             | 15098 |
| main_tet                          | 1    | 0.74 | 1.33 | Total tetracycline usage                                               | 12200 |
| reg_f_bedmilk_4yes                | 1    | 0.66 | 1.56 | Use of paper waste for milking cow bedding                             | 15625 |
| reg_f_foragetype_6yes             | 1    | 0.7  | 1.46 | Feeding of straw                                                       | 15070 |
| reg_f_aiexternal1                 | 1    | 0.79 | 1.28 | Artificial insemination performed by external company                  | 13663 |
| reg_f_bedmilk_3yes                | 1    | 0.78 | 1.27 | Use of sawdust as milking cow bedding                                  | 15820 |
| reg_f_outsource1                  | 1    | 0.72 | 1.4  | Whether heifer calves are reared by a different enterprise             | 15969 |

**Table S5:** Variables identified as associated with resistance for each multilevel, multivariable Bayesian logistic regression model and the effect on their coefficients when the model was re-run with sceptical priors.

### Amoxicillin

| Variable                    | Odds ratio | Lower CI | Upper CI | Odds ratio using sceptical priors | Lower CI using sceptical priors | Upper CI using sceptical priors | Description                                                  |
|-----------------------------|------------|----------|----------|-----------------------------------|---------------------------------|---------------------------------|--------------------------------------------------------------|
| reg_s_housed_outdooroutdoor | 0.27       | 0.2      | 0.37     | 0.28                              | 0.2                             | 0.38                            | Sample collected from pasture                                |
| reg_preweaned_heifer1       | 1.99       | 1.29     | 2.98     | 1.99                              | 1.29                            | 2.95                            | Sample collected from the environment of a pre-weaned heifer |
| main_s_temp                 | 1.91       | 1.57     | 2.35     | 1.9                               | 1.56                            | 2.34                            | Average monthly temperature                                  |

### Ciprofloxacin

| Variable              | Odds ratio | Lower CI | Upper CI | Odds ratio using sceptical priors | Lower CI using sceptical priors | Upper CI using sceptical priors | Description                                                  |
|-----------------------|------------|----------|----------|-----------------------------------|---------------------------------|---------------------------------|--------------------------------------------------------------|
| reg_preweaned_heifer1 | 4.13       | 2.79     | 6.46     | 4.12                              | 2.79                            | 6.41                            | Sample collected from the environment of a pre-weaned heifer |
| main_s_temp           | 2.14       | 1.63     | 2.87     | 2.12                              | 1.61                            | 2.82                            | Average monthly temperature                                  |

### Streptomycin

| Variable              | Odds ratio | Lower CI | Upper CI | Odds ratio using sceptical priors | Lower CI using sceptical priors | Upper CI using sceptical priors | Description                                                  |
|-----------------------|------------|----------|----------|-----------------------------------|---------------------------------|---------------------------------|--------------------------------------------------------------|
| reg_preweaned_heifer1 | 1.95       | 1.46     | 2.51     | 1.95                              | 1.46                            | 2.51                            | Sample collected from the environment of a pre-weaned heifer |
| main_s_temp           | 1.53       | 1.32     | 1.77     | 1.52                              | 1.32                            | 1.77                            | Average monthly temperature                                  |

### Tetracycline

| Variable                    | Odds ratio | Lower CI | Upper CI | Odds ratio using sceptical priors | Lower CI using sceptical priors | Upper CI using sceptical priors | Description                                                  |
|-----------------------------|------------|----------|----------|-----------------------------------|---------------------------------|---------------------------------|--------------------------------------------------------------|
| main_total_mg_pcu           | 1.47       | 1.01     | 2.13     | 1.46                              | 1                               | 2.11                            | Total antibiotic usage                                       |
| main_strep                  | 0.76       | 0.6      | 0.97     | 0.76                              | 0.6                             | 0.97                            | Total streptomycin usage                                     |
| reg_s_rain                  | 1.26       | 1.08     | 1.47     | 1.26                              | 1.08                            | 1.46                            | Average monthly rainfall                                     |
| reg_s_housed_outdooroutdoor | 0.24       | 0.15     | 0.35     | 0.24                              | 0.15                            | 0.35                            | Sample collected from pasture                                |
| reg_s_calving_now1          | 2.02       | 1.1      | 3.29     | 2.02                              | 1.1                             | 3.29                            | Sample collected during the calving season                   |
| reg_preweaned_heifer1       | 3.39       | 2        | 5.82     | 3.41                              | 2.01                            | 5.8                             | Sample collected from the environment of a pre-weaned heifer |
| main_s_temp                 | 1.98       | 1.55     | 2.55     | 1.97                              | 1.55                            | 2.52                            | Average monthly temperature                                  |

**Table S6:** Questions asked in questionnaires 1-4.

|                                                                                            | Data Type   | Response Options (If Relevant) |
|--------------------------------------------------------------------------------------------|-------------|--------------------------------|
| <b>Questionnaire 1</b>                                                                     |             |                                |
| How many hectares of land on the holding? Converted from acres by 0.4xacre where needed    | numerical   |                                |
| How many hectares on the holding are grazed? Converted from acres by 0.4xacre where needed | numerical   |                                |
| Are sheep in contact with the cattle?                                                      | categorical | <b>N: no Y: yes</b>            |
| Number of goats on the farm                                                                | numerical   |                                |
| Are goats in contact with the cattle?                                                      | categorical | <b>N: no Y: yes</b>            |
| Number of pigs on the farm                                                                 | numerical   |                                |
| Are the pigs in contact with the cattle?                                                   | categorical | <b>N: no Y: yes</b>            |
| Number of poultry on the farm                                                              | numerical   |                                |
| Is the poultry in contact with the cattle?                                                 | categorical | <b>N: no Y: yes</b>            |
| Number of equines on the farm                                                              | numerical   |                                |
| Are there horses or donkeys in contact with the cattle?                                    | categorical | <b>N: no Y: yes</b>            |
| Number of dogs on the farm                                                                 | numerical   |                                |
| Are the dogs in contact with the dairy cattle?                                             | categorical | <b>N: no Y: yes</b>            |
| Number of cats on the farm                                                                 | numerical   |                                |
| Are the cats in contact with the dairy cattle?                                             | categorical | <b>N: no Y: yes</b>            |
| Number of other species on the farm                                                        | numerical   |                                |
| Are these other species in contact with the cattle?                                        | categorical | <b>N: no Y: yes</b>            |
| What other species of animal, comments about animals on farm                               | text        |                                |
| How many cattle are currently on the farm?                                                 | numerical   |                                |
| How many of these cattle are in the dairy herd?                                            | numerical   |                                |
| How many cows are currently in milk?                                                       | numerical   |                                |
| How many dairy calves are currently under 8 weeks old?                                     | numerical   |                                |
| How many calves are currently 8-12 weeks old?                                              | numerical   |                                |
| How many dairy heifers are currently aged 12-24 months?                                    | numerical   |                                |

|                                                                                     |             |                                                                                                |
|-------------------------------------------------------------------------------------|-------------|------------------------------------------------------------------------------------------------|
| How many heifers are currently over 24 months but not calved?                       | numerical   |                                                                                                |
| Beef calves on farm                                                                 | numerical   |                                                                                                |
| Bulls on farm                                                                       | numerical   |                                                                                                |
| How many dairy calves under 8 weeks old brought in from elsewhere in the last year? | numerical   |                                                                                                |
| Source of dairy calves under 8 weeks,                                               | categorical | <b>1: private market 2: another holding 3: other site own herd 4: other</b>                    |
| How many dairy calves 8wk-12months brought in from elsewhere in the last year?      | numerical   |                                                                                                |
| Source of dairy calves 8 wks -12 months,                                            | categorical | <b>1: private market 2: another holding 3: other site own herd 4: other</b>                    |
| How many heifers brought in from elsewhere in the last year?                        | numerical   |                                                                                                |
| Source of heifers,                                                                  | categorical | <b>1: private market 2: another holding 3: other site own herd 4: other</b>                    |
| How many older heifers >24 months brought in from elsewhere in the last year?       | numerical   |                                                                                                |
| Source of heifers                                                                   | categorical | <b>1: private market 2: another holding 3: other site own herd 4: other</b>                    |
| How many dairy cows brought in from elsewhere in the last year?                     | numerical   |                                                                                                |
| Source of dairy cows                                                                | categorical | <b>1: private market 2: another holding 3: other site own herd 4: other</b>                    |
| How many bulls brought in from elsewhere in the last year?                          | numerical   |                                                                                                |
| Source of bulls                                                                     | categorical | <b>1: private market 2: another holding 3: other site own herd 4: other</b>                    |
| Average age at first calving, in months                                             | numerical   |                                                                                                |
| Dry cow period length in days                                                       | numerical   |                                                                                                |
| Do you use AI?                                                                      | categorical | <b>N: no Y: yes</b>                                                                            |
| Do you use natural service?                                                         | categorical | <b>N: no Y: yes</b>                                                                            |
| Average number of serves per conception                                             | numerical   |                                                                                                |
| How frequently do you have routine fertility visit?                                 | categorical | <b>1: every week 2: every fortnight 3: every three weeks 4: monthly 5: as necessary 6: n/a</b> |
| Total annual milk sales in million litres                                           | numerical   |                                                                                                |
| Average milk price over last 12 months, to nearest pence                            | numerical   |                                                                                                |
| 305 day milk yield 12 month rolling average per cow                                 | numerical   |                                                                                                |
| Somatic cell count 12 month rolling average per ml                                  | numerical   |                                                                                                |

|                                                                                        |             |                                                                     |
|----------------------------------------------------------------------------------------|-------------|---------------------------------------------------------------------|
| Average Bactoscan                                                                      | numerical   |                                                                     |
| Average no of days in milk, 12 month rolling average per cow                           | numerical   |                                                                     |
| Number of milkings per day                                                             | numerical   |                                                                     |
| Which milking system do you use?                                                       | numerical   | <b>1: herringbone 2: abreast 3: rotary 4: side-opening 5: robot</b> |
| Which company do you milk record with? Name or none                                    | text        |                                                                     |
| Percentage of cows in which antibiotic dry-cow tubes were used at dry-off in last year | numerical   |                                                                     |
| Percentage of cows in which systemic antibiotics were used at dry-off in last year     | numerical   |                                                                     |
| Clinical mastitis cases per 100 cows/year                                              | numerical   |                                                                     |
| Percentage of clinical mastitis that occurs in first 30 days of lactation              | numerical   |                                                                     |
| How is the milking routine adapted when high SCC cows are present?                     | text        |                                                                     |
| Routinely vaccinate against Bovine Viral Diarrhoea?                                    | categorical | <b>N: no Y: yes</b>                                                 |
| Routinely test for Bovine Viral Diarrhoea?                                             | categorical | <b>N: no Y: yes</b>                                                 |
| Herd status for BVD 0 - negative, 1 positive, 2 unknown                                | categorical | <b>0: negative 1: positive 2: unknown</b>                           |
| Accredited as free from BVD?                                                           | categorical | <b>N: no Y: yes</b>                                                 |
| Routinely vaccinate against Infectious Bovine Rhinotracheitis?                         | categorical | <b>N: no Y: yes</b>                                                 |
| Routinely test for IBR?                                                                | categorical | <b>N: no Y: yes</b>                                                 |
| Herd status for IBR                                                                    | categorical | <b>0: negative 1: positive 2: unknown</b>                           |
| Accredited as free from IBR?                                                           | categorical | <b>N: no Y: yes</b>                                                 |
| Routinely vaccinate against Leptospirosis?                                             | categorical | <b>N: no Y: yes</b>                                                 |
| Routinely test for Leptospirosis?                                                      | categorical | <b>N: no Y: yes</b>                                                 |
| Herd status for Leptospirosis?                                                         | categorical | <b>0: negative 1: positive 2: unknown</b>                           |
| Accredited as free from Leptospirosis?                                                 | categorical | <b>N: no Y: yes</b>                                                 |
| Routinely vaccinate against Johnes?                                                    | categorical | <b>N: no Y: yes</b>                                                 |
| Routinely test for Johnes?                                                             | categorical | <b>N: no Y: yes</b>                                                 |
| Herd status for Johnes?                                                                | categorical | <b>0: negative 1: positive 2: unknown</b>                           |
| Routinely vaccinate against Salmonella?                                                | categorical | <b>N: no Y: yes</b>                                                 |

|                                                                                 |             |                                                                                                                                                                                            |
|---------------------------------------------------------------------------------|-------------|--------------------------------------------------------------------------------------------------------------------------------------------------------------------------------------------|
| Routinely vaccinate against Lungworm/given Huskvac?                             | categorical | <b>N: no Y: yes</b>                                                                                                                                                                        |
| Routinely vaccinate against calf respiratory disease?<br>Vaccine name or 'none' | text        |                                                                                                                                                                                            |
| Routinely vaccinate against clostridial disease<br>(Blackleg/7 in 1)            | categorical | <b>N: no Y: yes</b>                                                                                                                                                                        |
| Routinely vaccinate against pasteurilla/mannheimia                              | categorical | <b>N: no Y: yes</b>                                                                                                                                                                        |
| Routinely vaccinate against diarrhoea , eg Rotavec<br>corona                    | categorical | <b>N: no Y: yes</b>                                                                                                                                                                        |
| Routinely vaccinate against ringworm                                            | categorical | <b>N: no Y: yes</b>                                                                                                                                                                        |
| comments on vaccination                                                         | text        |                                                                                                                                                                                            |
| cull rate excluding TB percentage                                               | numerical   |                                                                                                                                                                                            |
| Cull rate due to TB percentage                                                  | numerical   |                                                                                                                                                                                            |
| Death rate percentage                                                           | numerical   |                                                                                                                                                                                            |
| Average life span if given in years                                             | numerical   |                                                                                                                                                                                            |
| Average life span if given in lactations                                        | numerical   |                                                                                                                                                                                            |
| Is this an organic farm?                                                        | categorical | <b>N: no Y: yes</b>                                                                                                                                                                        |
|                                                                                 |             |                                                                                                                                                                                            |
| <b>Questionnaire 2</b>                                                          |             |                                                                                                                                                                                            |
| Main breed of cattle on farm                                                    | categorical | <b>Holstein, Friesian, Guernsey, Jersey, Crossbreed</b>                                                                                                                                    |
| Date questionnaire completed                                                    | date        |                                                                                                                                                                                            |
| Do you currently use selective dry cow therapy?                                 | categorical | <b>0: no 1: yes</b>                                                                                                                                                                        |
| When did you introduce selective dry cow therapy?                               | date        |                                                                                                                                                                                            |
| What is your SCC threshold for antibiotic treatment?                            | ordinal     | <b>1: up to 50 thousand 2: 51-100 thousand 3: 101-150 thousand 4: 151-200 thousand 5: 201-250 thousand 6: 251-300 thousand 7: 301-350 thousand 8: 351-400 thousand.</b>                    |
| When did you introduce this SCC threshold?                                      | date        |                                                                                                                                                                                            |
| What was your previous SCC threshold for antibiotic treatment?                  | ordinal     | <b>1: up to 50 thousand 2: 51-100 thousand 3: 101-150 thousand 4: 151-200 thousand 5: 201-250 thousand 6: 251-300 thousand 7: 301-350 thousand 8: 351-400 thousand 9: There wasn't one</b> |
| What clinical history of mastitis would trigger receiving antibiotics?          | categorical | <b>1: Mastitis this lactation 2: Had a case of mastitis within the last three months 3: Had a case of mastitis within the last six months 4: Has had repeat mastitis 5: Other.</b>         |
| Do you currently use teat sealant?                                              | categorical | <b>0: no 1: yes</b>                                                                                                                                                                        |
| When did you start using teat sealant?                                          | date        |                                                                                                                                                                                            |



|                                                                                              |             |                                                                                                                                                                                                                                                                                                                                                                       |
|----------------------------------------------------------------------------------------------|-------------|-----------------------------------------------------------------------------------------------------------------------------------------------------------------------------------------------------------------------------------------------------------------------------------------------------------------------------------------------------------------------|
| Do you currently use StartVac to vaccinate against mastitis?                                 | categorical | <b>0: no 1: yes</b>                                                                                                                                                                                                                                                                                                                                                   |
| When did you start using Startvac                                                            | date        |                                                                                                                                                                                                                                                                                                                                                                       |
| Do you currently use Imrestor to protect against mastitis?                                   | categorical | <b>0: no 1: yes</b>                                                                                                                                                                                                                                                                                                                                                   |
| When did you start using Imrestor?                                                           | date        |                                                                                                                                                                                                                                                                                                                                                                       |
| Which antibiotic tube do you currently use as your first choice for drying off?              | categorical | <b>Bovaclox DC, Bovaclox DC, Xtra Cefimam DC, Cefshot DC, Cephaguard DC, Cepravin DC, Kepravine DC, Kloxerate Gold DC, Multishield DC, Noraclox DC, Noraclox DC, Xtra Orbenin Dry Cow, Orbenin Extra, Sheptaclox DC, Ubro Red Dry Cow, Ubrostar Dry Cow, Other</b>                                                                                                    |
| Have you changed your first choice of tube for drying off in the last few years?             | categorical | <b>0: no 1: yes</b>                                                                                                                                                                                                                                                                                                                                                   |
| Approximately when did you change?                                                           | date        |                                                                                                                                                                                                                                                                                                                                                                       |
| What was your previous first choice for drying off?                                          | categorical | <b>Bovaclox DC, Bovaclox DC, Xtra Cefimam DC, Cefshot DC, Cephaguard DC, Cepravin DC, Kepravine DC, Kloxerate Gold DC, Multishield DC, Noraclox DC, Noraclox DC, Xtra Orbenin Dry Cow, Orbenin Extra, Sheptaclox DC, Ubro Red Dry Cow, Ubrostar Dry Cow, Other</b>                                                                                                    |
| First line dry cow tube used on the mothers of the calves in our cohort                      | categorical | <b>Bovaclox DC, Bovaclox DC, Xtra Cefimam DC, Cefshot DC, Cephaguard DC, Cepravin DC, Kepravine DC, Kloxerate Gold DC, Multishield DC, Noraclox DC, Noraclox DC, Xtra Orbenin Dry Cow, Orbenin Extra, Sheptaclox DC, Ubro Red Dry Cow, Ubrostar Dry Cow, Other</b>                                                                                                    |
| Which antibiotic tube do you currently use as your second choice for drying off?             | categorical | <b>Bovaclox DC, Bovaclox DC, Xtra Cefimam DC, Cefshot DC, Cephaguard DC, Cepravin DC, Kepravine DC, Kloxerate Gold DC, Multishield DC, Noraclox DC, Noraclox DC, Xtra Orbenin Dry Cow, Orbenin Extra, Sheptaclox DC, Ubro Red Dry Cow, Ubrostar Dry Cow, Other</b>                                                                                                    |
| Have you changed your second choice of tube for drying off in the last few years?            | categorical | <b>0: no 1: yes</b>                                                                                                                                                                                                                                                                                                                                                   |
| Approximately when did you change?                                                           | date        |                                                                                                                                                                                                                                                                                                                                                                       |
| What was your previous second choice for drying off?                                         | categorical | <b>Bovaclox DC, Bovaclox DC, Xtra Cefimam DC, Cefshot DC, Cephaguard DC, Cepravin DC, Kepravine DC, Kloxerate Gold DC, Multishield DC, Noraclox DC, Noraclox DC, Xtra Orbenin Dry Cow, Orbenin Extra, Sheptaclox DC, Ubro Red Dry Cow, Ubrostar Dry Cow, Other</b>                                                                                                    |
| What is your first line choice of antibiotic tube for clinical mastitis                      | categorical | <b>Caremast Vet, Ceffect LC, Cefimam LC, Cefquinor LC, Clavamox LC, Cobactan MC, Combiclav Lactating Cow, Duofast, Lactaclox, Lactatrim MC, Lincocin Forte, Mastiplan LC, Multiject IMM, Noroclav Lactating Cow, Orbenin LA, Orbolan Lactating, Pathocef, Pathozone, Pirsue, Procopen Injector, Synulox Lactating Cow, Tetra-Delta, Ubro Yellow, Ubrolexin, Other</b> |
| Have you changed your first line choice of tube for clinical mastitis in the last few years? | categorical | <b>0: yes 1: no</b>                                                                                                                                                                                                                                                                                                                                                   |
| Approximately when did you change?                                                           | date        |                                                                                                                                                                                                                                                                                                                                                                       |

|                                                                                                |             |                                                                                                                                                                                                                                                                                                                                                                |
|------------------------------------------------------------------------------------------------|-------------|----------------------------------------------------------------------------------------------------------------------------------------------------------------------------------------------------------------------------------------------------------------------------------------------------------------------------------------------------------------|
| What was your previous first line choice for clinical mastitis                                 | categorical | Caremast Vet, Ceffect LC, Cefimam LC, Cefquinor LC, Clavamox LC, Cobactan MC, Combiclav Lactating Cow, Duofast, Lactaclox, Lactatrim MC, Lincocin Forte, Mastiplan LC, Multiject IMM, Noroclav Lactating Cow, Orbenin LA, Orbolan Lactating, Pathocef, Pathozone, Pirsue, Procaben Injector, Synulox Lactating Cow, Tetra-Delta, Ubro Yellow, Ubrolexin, Other |
| What is your second line choice of antibiotic tube for clinical mastitis?                      | categorical | Caremast Vet, Ceffect LC, Cefimam LC, Cefquinor LC, Clavamox LC, Cobactan MC, Combiclav Lactating Cow, Duofast, Lactaclox, Lactatrim MC, Lincocin Forte, Mastiplan LC, Multiject IMM, Noroclav Lactating Cow, Orbenin LA, Orbolan Lactating, Pathocef, Pathozone, Pirsue, Procaben Injector, Synulox Lactating Cow, Tetra-Delta, Ubro Yellow, Ubrolexin, Other |
| Have you changed your second line choice of tube for clinical mastitis in the last few years?  | categorical | 0: yes 1: no                                                                                                                                                                                                                                                                                                                                                   |
| Approximately when did you change?                                                             | date        |                                                                                                                                                                                                                                                                                                                                                                |
| What was your previous second line choice for clinical mastitis                                | categorical | Caremast Vet, Ceffect LC, Cefimam LC, Cefquinor LC, Clavamox LC, Cobactan MC, Combiclav Lactating Cow, Duofast, Lactaclox, Lactatrim MC, Lincocin Forte, Mastiplan LC, Multiject IMM, Noroclav Lactating Cow, Orbenin LA, Orbolan Lactating, Pathocef, Pathozone, Pirsue, Procaben Injector, Synulox Lactating Cow, Tetra-Delta, Ubro Yellow, Ubrolexin, Other |
| How many days do you routinely treat clinical mastitis cases for with your first line tube?    | numerical   |                                                                                                                                                                                                                                                                                                                                                                |
| How many times a day do you tube clinical cases of mastitis with your first line tube?         | numerical   |                                                                                                                                                                                                                                                                                                                                                                |
| What percentage of clinical mastitis cases are given injectable antibiotics?                   | numerical   |                                                                                                                                                                                                                                                                                                                                                                |
| What percentage of cases receive non steroidal anti inflammatories?                            | numerical   |                                                                                                                                                                                                                                                                                                                                                                |
| Have you made any other changes to prevention or management of mastitis in the last few years? | categorical | 0: no 1: yes                                                                                                                                                                                                                                                                                                                                                   |
| What are these changes?                                                                        | text        |                                                                                                                                                                                                                                                                                                                                                                |
| Which vaccines do you routinely use to prevent against calf respiratory disease?               | categorical | None, Bovilis Bovipast RSP Bovilis IBR Marker Inactiv Bovilis IBR Marker Live Rispoval IBR Marker inactiv Rispoval IBR Marker Live Rispoval 3 Rispoval 4 Rispoval Pastuerella Rispoval RS Rispoval RS + PI3 Bovilis BVD Other (freetext)                                                                                                                       |
| Did you start vaccinating routinely in the last few years?                                     | categorical | 0: no 1: yes                                                                                                                                                                                                                                                                                                                                                   |
| Do you give antibiotics to all calves to prevent respiratory disease (blanket therapy)?        | categorical | 0: no 1: yes                                                                                                                                                                                                                                                                                                                                                   |
| Which antibiotic do you mainly use for preventative blanket thereapy?                          | categorical | 1st gen Ceph, 3rd gen Ceph, 4th gen Ceph, Aminoglycoside, Amphenicol, Fluoroquinolone, Macrolide, Penicillin/Pen-Strep/Amox-Clav, Sulfonamide/Suf-Trim, Tetracycline, Lincomycin, Other                                                                                                                                                                        |

|                                                                                      |             |                                                                                                                                                                                                                                                                                                                                                                                                                                                                              |
|--------------------------------------------------------------------------------------|-------------|------------------------------------------------------------------------------------------------------------------------------------------------------------------------------------------------------------------------------------------------------------------------------------------------------------------------------------------------------------------------------------------------------------------------------------------------------------------------------|
| Do you use metaphylaxis if there's an outbreak of respiratory disease?               | categorical | <b>0: no 1: yes</b>                                                                                                                                                                                                                                                                                                                                                                                                                                                          |
| Which antibiotic do you mainly use for metaphylaxis?                                 | categorical | <b>1st gen Ceph, 3rd gen Ceph, 4th gen Ceph, Aminoglycoside, Amphenicol, Fluoroquinolone, Macrolide, Penicillin/Pen-Strep/Amox-Clav, Sulfonamide/Suf-Trim, Tetracycline, Lincomycin, Other</b>                                                                                                                                                                                                                                                                               |
| Do you usually treat clinical cases with an antibiotic?                              | categorical | <b>0: no 1: yes</b>                                                                                                                                                                                                                                                                                                                                                                                                                                                          |
| What are the criteria for treating a clinical case of respiratory disease?           | categorical | <b>1: Heavy breathing 2: Fever/pyrexia 3: Nasal discharge 4: Number of cases</b>                                                                                                                                                                                                                                                                                                                                                                                             |
| Which antibiotic do you mainly use to treat clinical cases?                          | categorical | <b>1st gen Ceph, 3rd gen Ceph, 4th gen Ceph, Aminoglycoside, Amphenicol, Fluoroquinolone, Macrolide, Penicillin/Pen-Strep/Amox-Clav, Sulfonamide/Suf-Trim, Tetracycline, Lincomycin, Other</b>                                                                                                                                                                                                                                                                               |
| Do you routinely use non-steroidal anti-inflammatories in calf pneumonia cases?      | categorical | <b>0: no 1: yes</b>                                                                                                                                                                                                                                                                                                                                                                                                                                                          |
| Do you routinely use steroids in calf pneumonia cases?                               | categorical | <b>0: no 1: yes</b>                                                                                                                                                                                                                                                                                                                                                                                                                                                          |
| Have you made any changes around prevention of calf pneumonia in the last few years? | categorical | <b>1: I started using blanket therapy 2: I changed the antibiotic used for blanket therapy 3: I stopped using blanket therapy 4: I started using metaphylaxis 5: I changed the antibiotic used in metaphylaxis 6: I stopped using metaphylaxis 7: I changed the criteria for treatment of clinical cases 8: I changed the antibiotic used for clinical cases 9: I started using NSAIDs or steroids 10: I stopped using NSAIDs or steroids 11: No change 12: Other change</b> |
| Approximately when did you change?                                                   | date        |                                                                                                                                                                                                                                                                                                                                                                                                                                                                              |
| Briefly describe the changes in prevention of calf pneumonia                         | text        |                                                                                                                                                                                                                                                                                                                                                                                                                                                                              |
| Categorising the changes they've made to pneumonia management- see coding column     | categorical | <b>0: none 1: Housing 2: Vaccinating 3: Colostrum 4: Treatments</b>                                                                                                                                                                                                                                                                                                                                                                                                          |
| Do you routinely use Rotavac corona to vaccinate against enteric disease?            | categorical | <b>0: no 1: yes</b>                                                                                                                                                                                                                                                                                                                                                                                                                                                          |
| Did you start routinely vaccinating against calf diarrhoea in the last year?         | categorical | <b>0: no 1: yes</b>                                                                                                                                                                                                                                                                                                                                                                                                                                                          |
| Approximately when did you start?                                                    | date        |                                                                                                                                                                                                                                                                                                                                                                                                                                                                              |
| Do you routinely give preventive anticoccidial treatments?                           | categorical | <b>0: no 1: yes</b>                                                                                                                                                                                                                                                                                                                                                                                                                                                          |
| Do you routinely use Halocur as a cryptosporidium preventative?                      | categorical | <b>0: no 1: yes</b>                                                                                                                                                                                                                                                                                                                                                                                                                                                          |
| Do you currently routinely add antibiotics in milk or feed for calves?               | categorical | <b>0: no 1: yes</b>                                                                                                                                                                                                                                                                                                                                                                                                                                                          |

|                                                                                                      |             |                                                                                                                                                                                                                                                                                                                                                                                                                                 |
|------------------------------------------------------------------------------------------------------|-------------|---------------------------------------------------------------------------------------------------------------------------------------------------------------------------------------------------------------------------------------------------------------------------------------------------------------------------------------------------------------------------------------------------------------------------------|
| Do you routinely use oral antibiotics as prevention against calf diarrhoea?                          | categorical | <b>0: no 1: yes</b>                                                                                                                                                                                                                                                                                                                                                                                                             |
| Have you made any changes in prevention of calf diarrhoea in the last few years?                     | categorical | <b>1: I started using anticoccidials routinely 2: I stopped using anticoccidials routinely 3: I started using Halocur 4: I stopped using Halocur 5: I started adding antibiotic to milk/feed 6: I stopped adding antibiotic to milk/feed 7: I changed the antibiotic added to milk/feed 8: I started giving oral antibiotic 9: I stopped using oral antibiotic 10: I changed oral antibiotic 11: No change 12: Other change</b> |
| Give brief details of the change                                                                     | text        |                                                                                                                                                                                                                                                                                                                                                                                                                                 |
| Do you routinely use oral antibiotics (including boluses) to treat clinical cases of calf diarrhoea? | categorical | <b>0: no 1: yes</b>                                                                                                                                                                                                                                                                                                                                                                                                             |
| Which oral antibiotics do you mostly use for clinical cases?                                         | categorical | <b>1st gen Ceph, 3rd gen Ceph, 4th gen Ceph, Aminoglycoside, Amphenicol, Fluoroquinolone, Macrolide, Penicillin/Pen-Strep/Amox-Clav, Sulfonamide/Suf-Trim, Tetracycline, Lincomycin, Other</b>                                                                                                                                                                                                                                  |
| Do you routinely use injectable antibiotics to treat clinical cases?                                 | categorical | <b>0: no 1: yes</b>                                                                                                                                                                                                                                                                                                                                                                                                             |
| Which injectable antibiotic do you mostly use for clinical cases?                                    | categorical | <b>1st gen Ceph, 3rd gen Ceph, 4th gen Ceph, Aminoglycoside, Amphenicol, Fluoroquinolone, Macrolide, Penicillin/Pen-Strep/Amox-Clav, Sulfonamide/Suf-Trim, Tetracycline, Lincomycin, Other</b>                                                                                                                                                                                                                                  |
| Do you routinely use electrolytes to treat clinical cases of calf diarrhoea?                         | categorical | <b>0: no 1: yes</b>                                                                                                                                                                                                                                                                                                                                                                                                             |
| Do you routinely use intravenous fluids to treat clinical cases of calf diarrhoea?                   | categorical | <b>0: no 1: yes</b>                                                                                                                                                                                                                                                                                                                                                                                                             |
| Do you routinely use non steroidal anti inflammatories to treat clinical cases of calf diarrhoea?    | categorical | <b>0: no 1: yes</b>                                                                                                                                                                                                                                                                                                                                                                                                             |
| Have you made any changes around treatment of calf diarrhoea in the last few years?                  | categorical | <b>1: I started using oral antibiotics/boluses 2: I stopped using oral antibiotis 3: I changed the oral antibiot 4: I started using injectable antibiotic 5: I stopped using injectable antibiotics 6: I changed the injectable antibiotic that I use 7: Other change 8: No changes</b>                                                                                                                                         |
| Briefly describe these changes                                                                       | text        |                                                                                                                                                                                                                                                                                                                                                                                                                                 |
| Do you routinely use a footbath for lameness prevention?                                             | categorical | <b>0: no 1: yes</b>                                                                                                                                                                                                                                                                                                                                                                                                             |
| Which product do you most frequently use in the footbath for preventative treatment?                 | categorical | <b>1: Formalin 2: Copper Sulphate 3: Zinc Sulphate 4: Tylan 5: Lincospectin 6: Lincocin 7: Other 8: macrolide</b>                                                                                                                                                                                                                                                                                                               |
| Name of routine footbath product                                                                     | text        |                                                                                                                                                                                                                                                                                                                                                                                                                                 |

|                                                                                                                             |             |                                                                                                                                                                                                |
|-----------------------------------------------------------------------------------------------------------------------------|-------------|------------------------------------------------------------------------------------------------------------------------------------------------------------------------------------------------|
| Do you frequently use any other product do you routinely use in the footbath for preventative treatment?                    | categorical | <b>1: Formalin 2: Copper Sulphate 3: Zinc Sulphate 4: Tylan 5: Lincospectin 6: Lincocin 7: Other 8: macrolide</b>                                                                              |
| Name of second footbath product                                                                                             | text        |                                                                                                                                                                                                |
| How frequently do you footbath for prevention of lameness?                                                                  | categorical | <b>1: Daily 2: every other day 3: every few days 4: weekly 5: less than weekly.</b>                                                                                                            |
| Do you use a footbath to treat an outbreak of lameness?                                                                     | categorical | <b>0: no 1: yes</b>                                                                                                                                                                            |
| What product do you most frequently used in the footbath for treatment?                                                     | categorical | <b>1: Formalin 2: Copper Sulphate 3: Zinc Sulphate 4: Tylan 5: Lincospectin 6: Lincocin 7: Other 8: macrolide</b>                                                                              |
| How do you usually treat individual cows with infectious lameness (foul, digital dermatitis)                                | categorical | <b>1: topical antibiotic 2: injectable antibiotic 3: other</b>                                                                                                                                 |
| Name of other footbath product for lameness                                                                                 | text        |                                                                                                                                                                                                |
| Which topical antibiotic do you mostly use for infectious lameness?                                                         | categorical | <b>Alamycin, Animedazon CT,C Cyclo, Engemycin, Oxycare Taf, Terramycin, Other</b>                                                                                                              |
| Name of topical antibiotic for lameness                                                                                     | text        |                                                                                                                                                                                                |
| Which injectable antibiotic do you mostly used for clinical lameness                                                        | categorical | <b>1st gen Ceph, 3rd gen Ceph, 4th gen Ceph, Aminoglycoside, Amphenicol, Fluoroquinolone, Macrolide, Penicillin/Pen-Strep/Amox-Clav, Sulfonamide/Suf-Trim, Tetracycline, Lincomycin, Other</b> |
| Have you made, any changes to your lameness prevention or treatment routines with the intention of reducing antibiotic use? | categorical | <b>0: no 1: yes</b>                                                                                                                                                                            |
| Briefly describe the changes to your lameness protocols                                                                     | text        |                                                                                                                                                                                                |
| Do you routinely use antibiotics following a difficult calving?                                                             | categorical | <b>0: no 1: yes</b>                                                                                                                                                                            |
| Which antibiotic do you routinely use post-calving?                                                                         | categorical | <b>1st gen Ceph, 3rd gen Ceph, 4th gen Ceph, Aminoglycoside, Amphenicol, Fluoroquinolone, Macrolide, Penicillin/Pen-Strep/Amox-Clav, Sulfonamide/Suf-Trim, Tetracycline, Lincomycin, Other</b> |
| Do you routinely give non steroidal anti inflammatories for a difficult calving?                                            | categorical | <b>0: no 1: yes</b>                                                                                                                                                                            |
| How do you routinely treat cases of Retained Foetal Membrane (without illness)?                                             | categorical | <b>1: Injectable antibiotics 2: intra-uterine antibiotics 3: intra-uterine non-antibiotic 4: non-steroidal anti-inflammatory 5: oral fluids 6: no treatment 7: other</b>                       |
| Which other treatment for retained foetal membrane?                                                                         | text        |                                                                                                                                                                                                |

|                                                                                                   |             |                                                                                                                                                                                                |
|---------------------------------------------------------------------------------------------------|-------------|------------------------------------------------------------------------------------------------------------------------------------------------------------------------------------------------|
| Which antibiotic do you mostly use for retained foetal membrane?                                  | categorical | <b>1st gen Ceph, 3rd gen Ceph, 4th gen Ceph, Aminoglycoside, Amphenicol, Fluoroquinolone, Macrolide, Penicillin/Pen-Strep/Amox-Clav, Sulfonamide/Suf-Trim, Tetracycline, Lincomycin, Other</b> |
| Name of antibiotic for retained foetal membrane?                                                  | text        |                                                                                                                                                                                                |
| How do you routinely treat cases of metritis?                                                     | categorical | <b>1: Injectable antibiotics 2: intra-uterine antibiotics 3: intra-uterine non-antibiotic 4: non-steroidal anti-inflammatory 5: oral fluids 6: no treatment 7: other</b>                       |
| Which antibiotic do you mostly use for metritis?                                                  | categorical | <b>1st gen Ceph, 3rd gen Ceph, 4th gen Ceph, Aminoglycoside, Amphenicol, Fluoroquinolone, Macrolide, Penicillin/Pen-Strep/Amox-Clav, Sulfonamide/Suf-Trim, Tetracycline, Lincomycin, Other</b> |
| Name of antibiotic for metritis?                                                                  | text        |                                                                                                                                                                                                |
| How do you routinely treat cases of endometritis?                                                 | categorical | <b>1: Injectable antibiotics 2: intra-uterine antibiotics 3: intra-uterine non-antibiotic 4: non-steroidal anti-inflammatory 5: oral fluids 6: no treatment 7: other</b>                       |
| What other treatment for endometritis?                                                            | text        |                                                                                                                                                                                                |
| Which antibiotic do you mostly use for endometritis?                                              | categorical | <b>1st gen Ceph, 3rd gen Ceph, 4th gen Ceph, Aminoglycoside, Amphenicol, Fluoroquinolone, Macrolide, Penicillin/Pen-Strep/Amox-Clav, Sulfonamide/Suf-Trim, Tetracycline, Lincomycin, Other</b> |
| Have you made any changes to your post-calving procedures with a view to reducing antibiotic use? | categorical | <b>0: no 1: yes</b>                                                                                                                                                                            |
| Briefly describe these changes                                                                    | text        |                                                                                                                                                                                                |
| Categorising the changes they've made to post calving management- see coding column               | categorical | <b>0: none 1: Nutrition 2: Abs 3: Hygiene 4: Monitoring 5: Pain relief</b>                                                                                                                     |
| Other comments noted by researcher                                                                | text        |                                                                                                                                                                                                |
|                                                                                                   |             |                                                                                                                                                                                                |
| <b>Questionnaire 3</b>                                                                            |             |                                                                                                                                                                                                |
| Which housing types do you use for the milking herd?                                              | categorical | <b>1:cubicle shed 2: loose housing 3: kennels 4:other</b>                                                                                                                                      |
| Which housing types do you use for youngstock ?                                                   | categorical | <b>1:cubicle shed 2: loose housing 3: kennels 4:other</b>                                                                                                                                      |
| Which housing types do you use for dry cows?                                                      | categorical | <b>1:cubicle shed 2: loose housing 3: kennels 4:other</b>                                                                                                                                      |
| If other types of housing are used, please give details                                           | text        |                                                                                                                                                                                                |
| Are close-up cows housed separately to other dry cows?                                            | ordinal     | <b>1:yes always 2: yes in summer 3: yes sometimes 4:No not at all</b>                                                                                                                          |
| Where are calves usually born?                                                                    | categorical | <b>1:In group pen 2: In individual pen 3: Outdoors 4:Other</b>                                                                                                                                 |
| If other, please give details                                                                     | text        |                                                                                                                                                                                                |
| Is the area where calves are usually born...                                                      | categorical | <b>1:Also used for sick cows 2: Also used for lame cows 3: Also used for Johne's positive cows 4:Only used for close-up or calving cows 5: Also used for any other cows</b>                    |

|                                                                                            |             |                                                                                                                                                                                                                                                                                                                                                                                                                    |
|--------------------------------------------------------------------------------------------|-------------|--------------------------------------------------------------------------------------------------------------------------------------------------------------------------------------------------------------------------------------------------------------------------------------------------------------------------------------------------------------------------------------------------------------------|
| If 'any other cows', please give details                                                   | text        |                                                                                                                                                                                                                                                                                                                                                                                                                    |
| What flooring types are in the main calving areas?                                         | categorical | <b>1:concrete 2: rubber mats 3: dirt 4:pasture 5: other</b>                                                                                                                                                                                                                                                                                                                                                        |
| When are these calving areas cleaned?                                                      | ordinal     | <b>1:After each calving 2: After every few calvings 3: Daily 4:Weekly 5: Monthly 6: Other</b>                                                                                                                                                                                                                                                                                                                      |
| Are calving pens,                                                                          | categorical | <b>1:Temporary sectioned off areas of the dry cow pen 2: Separate pen adjoining the dry cow pen 3: Separate pen not adjoining the dry cow pen 4:Other</b>                                                                                                                                                                                                                                                          |
| Is your hospital area                                                                      | categorical | <b>1:Individual animal pens 2: Shared with other hospitalised cows 3: Shared with dry cows 4:Shared with youngstock 5: Shared with calving cows 6: other</b>                                                                                                                                                                                                                                                       |
| If other, please give details                                                              | text        |                                                                                                                                                                                                                                                                                                                                                                                                                    |
| What housing types have calves been kept in since the start of the study?                  | categorical | <b>1:Individual animals in a shed also used for older animals 2: Individual animals in a shed not used for older animals 3: Individual calf hutches with external pen 4:Individual calf hutches without external pen 5: Group pens in a shed also used for older animals 6: Group pens in a shed not used for older animals 7: Group calf hutches without external pen 8: Group calf hutches with external pen</b> |
| Where are youngstock housed?                                                               | categorical | <b>1:Same unit and airspace as milking herd 2: Same unit as milking herd but different airspace 3: Same unit but different building to dairy herd 4:Different unit to dairy herd</b>                                                                                                                                                                                                                               |
| How is manure removed from cubicle sheds?                                                  | categorical | <b>1&gt;manual/tractor scrape 2: automatic scraper 3: alley flush 4:slats 5: other</b>                                                                                                                                                                                                                                                                                                                             |
| What bedding types have you mostly use for milking cows since the start of the study?      | categorical | <b>1:Sand 2: Straw 3: Sawdust 4:Paper waste 5: Wood waste 6: Green bedding (RMS) 7: Seperated digestate from AD plant 8: Other</b>                                                                                                                                                                                                                                                                                 |
| What bedding types have you mostly use for pre weaned calves since the start of the study? | categorical | <b>1:Sand 2: Straw 3: Sawdust 4:Paper waste 5: Wood waste 6: Green bedding (RMS) 7: Seperated digestate from AD plant 8: Other</b>                                                                                                                                                                                                                                                                                 |
| What bedding types have you mostly use for youngstock since the start of the study?        | categorical | <b>1:Sand 2: Straw 3: Sawdust 4:Paper waste 5: Wood waste 6: Green bedding (RMS) 7: Seperated digestate from AD plant 8: Other</b>                                                                                                                                                                                                                                                                                 |
| What bedding types have you mostly use for dry cows since the start of the study?          | categorical | <b>1:Sand 2: Straw 3: Sawdust 4:Paper waste 5: Wood waste 6: Green bedding (RMS) 7: Seperated digestate from AD plant 8: Other</b>                                                                                                                                                                                                                                                                                 |
| Do you use lime in housing areas?                                                          | ordinal     | <b>1:yes routinely 2: yes sometimes 3: no never 4:Don't know</b>                                                                                                                                                                                                                                                                                                                                                   |
| What is your premilking routine?                                                           | categorical | <b>1:Dry wipe 2: Wipe with wet cloth 3: Wipe with medicated cloth 4:Robots- udder cleaned with brush 5: none 6: other 7: Robots-other</b>                                                                                                                                                                                                                                                                          |
| When are fresh cloths used?                                                                | ordinal     | <b>1:between each teat 2: between each animal 3: between parlour sides 4:for each milking session 5: daily 6: other 7: N/A- cloths not used</b>                                                                                                                                                                                                                                                                    |
| Do you pre-dip?                                                                            | categorical | <b>1:yes routinely 2: yes sometimes 3: no never 4:No robots used</b>                                                                                                                                                                                                                                                                                                                                               |
| Do you post-dip?                                                                           | categorical | <b>1:yes frequently 2: yes sometimes 3: no never</b>                                                                                                                                                                                                                                                                                                                                                               |
| Are gloves worn?                                                                           | categorical | <b>1:yes routinely 2: yes sometimes 3: no never 4:N/A- robots</b>                                                                                                                                                                                                                                                                                                                                                  |
| Do you have automatic cluster flushing?                                                    | categorical | <b>1:yes 2: no</b>                                                                                                                                                                                                                                                                                                                                                                                                 |

|                                                                                 |             |                                                                                                                                                     |
|---------------------------------------------------------------------------------|-------------|-----------------------------------------------------------------------------------------------------------------------------------------------------|
| How often is the milking cluster cleaned?                                       | categorical | <b>1:Between each animal 2: Between groups 3: For each milking session 4:After high risk animals 5: Daily 6: other</b>                              |
| How often do you use disinfectant to wash down the milking parlour/ robot area? | ordinal     | <b>1:Daily 2: Weekly 3: Monthly 4:Yearly 5: As needed 6: Other</b>                                                                                  |
| Is your farm organic?                                                           | categorical | <b>1:yes 2: no 3: no transitioning</b>                                                                                                              |
| disinfect Pens, sheds and other housing                                         | text        |                                                                                                                                                     |
| Calving and hospital areas                                                      | text        |                                                                                                                                                     |
| disinfect Milking parlour and equipment                                         | text        |                                                                                                                                                     |
| Boot baths for staff and visitors                                               | text        |                                                                                                                                                     |
| Calf milk feed equipment                                                        | text        |                                                                                                                                                     |
| Food and water troughs                                                          | text        |                                                                                                                                                     |
| Pre-dip and post-dip disinfectants                                              | text        |                                                                                                                                                     |
| How do you dilute your disinfectants/antiseptics?                               | categorical | <b>1:Measure out accurately 2: Measure out by eye 3: Use approximate measures 4:However it comes</b>                                                |
| What forages do you feed animals on farm?                                       | categorical | <b>1:Clamp grass silage 2: Big bale grass silage 3: Maize silage 4:Wholecrop silage 5: Hay 6: Straw 7: Haylage 8: Other</b>                         |
| Have you bought in any of these forages in the last 2 years?                    | categorical | <b>1:Clamp grass silage 2: Big bale grass silage 3: Maize silage 4:Wholecrop silage 5: Hay 6: Straw 7: Haylage 8: Other9: haven't bought any in</b> |
| Where have you bought non-forage feeds from?                                    | categorical | <b>1:Feed mill 2: Another farm 3: Food waste processor 4:Other</b>                                                                                  |
| Do your milking cows graze?                                                     | categorical | <b>1:yes - all 2: yes - some 3: no</b>                                                                                                              |
| Do your dry cows graze?                                                         | categorical | <b>1:yes - all 2: yes - some 3: no</b>                                                                                                              |
| Do your dairy youngstock graze?                                                 | categorical | <b>1:yes - all 2: yes - some 3: no</b>                                                                                                              |
| Which sources of drinking water supply are used?                                | categorical | <b>1:mains 2: private source - treated 3: private source - untreated 4:other</b>                                                                    |
| Which sources of drinking water are available on pasture?                       | categorical | <b>1:water course 2: pond 3: trough - mains 4:trough- private source 5: other</b>                                                                   |
| If other, please describe sources                                               | text        |                                                                                                                                                     |
| How often are water troughs cleaned for the milking cows?                       | ordinal     | <b>1:daily 2: every few days 3: weekly 4:monthly 5: as needed</b>                                                                                   |
| How often are water troughs cleaned for the dry cows?                           | ordinal     | <b>1:daily 2: every few days 3: weekly 4:monthly 5: as needed</b>                                                                                   |
| How often are water troughs cleaned for the youngstock?                         | ordinal     | <b>1:daily 2: every few days 3: weekly 4:monthly 5: as needed</b>                                                                                   |
| How often are water troughs cleaned for the pre weaned calves?                  | ordinal     | <b>1:daily 2: every few days 3: weekly 4:monthly 5: as needed</b>                                                                                   |



|                                                                                                                      |             |                                                                                                                                            |
|----------------------------------------------------------------------------------------------------------------------|-------------|--------------------------------------------------------------------------------------------------------------------------------------------|
| How long do calves usually stay with their dams?                                                                     | ordinal     | <b>1: taken immediately 2: &lt;1 hour 3: 1-4 hours 4: &gt;4 hours 5: &gt;12 hours 6: &gt;24 hours</b>                                      |
| Do you dip or spray the umbilicus?                                                                                   | ordinal     | <b>1: yes frequently 2: yes sometimes 3: no never</b>                                                                                      |
| If so, what with?                                                                                                    | categorical | <b>1: Blue spray 2: Iodine 3: Chlorhexidine 4: Other</b>                                                                                   |
| If other, please give details                                                                                        | text        |                                                                                                                                            |
| Do calves suckle after birth?                                                                                        | ordinal     | <b>1: yes frequently 2: yes sometimes 3: no never</b>                                                                                      |
| Is colostrum given within the first six hours by a member of staff?                                                  | ordinal     | <b>1: Always 2: Often 3: Usually 4: Sometimes 5: Occasionally 6: No the calves suckle</b>                                                  |
| How much colostrum do they get in the first six hours?                                                               | ordinal     | <b>1: &lt;1L 2: 1-2L 3: 2-3L 4: 3-4L 5: &gt;4L</b>                                                                                         |
| How is it given?                                                                                                     | categorical | <b>1: Stomach tube 2: Bottle 3: Bucket 4: Other</b>                                                                                        |
| Which types of colostrum do you routinely use?                                                                       | categorical | <b>1: Dam- fresh 2: Dam- pasteurised 3: Other cow- fresh 4: Other cow- frozen 5: Other cow- pasteurised 6: Pooled 7: Locatim 8: Powder</b> |
| How do you store colostrum?                                                                                          | categorical | <b>1: Buckets (room temperature) 2: Fridge 3: Freezer 4: I don't store it 5: Other</b>                                                     |
| Which types of milk do you routinely use for replacement heifer calves?                                              | categorical | <b>1: whole milk 2: pasteurised whole milk 3: milk replacer 4: other</b>                                                                   |
| In the last year or so, have dairy calves been fed waste milk from cows treated with antibacterials at dry off?      | ordinal     | <b>1: yes routinely 2: yes sometimes 3: no never 4: Don't know</b>                                                                         |
| In the last year or so have beef calves been fed waste milk from cows treated with antibacterials at dry off?        | ordinal     | <b>1: yes routinely 2: yes sometimes 3: no never 4: Don't know</b>                                                                         |
| In the last year or so have dairy calves been fed waste milk from cows treated with antibacterials during lactation? | ordinal     | <b>1: yes routinely 2: yes sometimes 3: no never 4: Don't know</b>                                                                         |
| In the last year or so have beef calves been fed waste milk from cows treated with antibacterials during lactation?  | ordinal     | <b>1: yes routinely 2: yes sometimes 3: no never 4: Don't know</b>                                                                         |
| Have you changed your practices around feeding of waste milk in the last 12-24 months?                               | categorical | <b>1: yes 2: no 3: Don't know</b>                                                                                                          |
| If yes, what has changed?                                                                                            | text        |                                                                                                                                            |
| How are calves fed?                                                                                                  | categorical | <b>1: Individual buckets- with teat 2: Individual buckets- without teat 3: Shared buckets 4: Milk bars 5: Machine</b>                      |
| How often are calves fed?                                                                                            | ordinal     | <b>1: Daily 2: Twice a day 3: Three times a day 4: Four times a day 5: On demand 6: Other</b>                                              |
| How much milk are calves given per feed in the first few weeks of life?                                              | ordinal     | <b>1: &lt;1L 2: 1-2L 3: 2-3L 4: 3-4L 5: &gt;4L 6: Ad lib</b>                                                                               |
|                                                                                                                      | text        |                                                                                                                                            |

|                                                                                       |             |                                                                                                                                                                                                                                                                                                                                         |
|---------------------------------------------------------------------------------------|-------------|-----------------------------------------------------------------------------------------------------------------------------------------------------------------------------------------------------------------------------------------------------------------------------------------------------------------------------------------|
| What sources of water are used to make up calf milk replacer?                         | categorical | <b>1:Mains 2: Private-untreated 3: Private- treated 4:Other 5: Not applicable- I only use whole milk</b>                                                                                                                                                                                                                                |
| What temperature do you normally feed calf milk at?                                   | categorical | <b>1:Ambient 2: 40 degrees 3: Other</b>                                                                                                                                                                                                                                                                                                 |
| How do you achieve this temperature?                                                  | categorical | <b>1:Use whole milk straight from the cow 2: Milk replacer- made with water from a boiler heated to a constant temperature 3: Milk replacer- made with water from a hot tap mixed with a cold tap as necessary 4:Milk replacer- made with water from a boiler heated to above the desired temperature and cold water added 5: Other</b> |
| At what age are calves usually weaned?                                                | categorical | <b>1:&lt;6 weeks 2: 6-8 weeks 3: 8-10 weeks 4:&gt;10 weeks 5: Depends on weight 6: Depends on amount of creep feed they're eating 7: Other</b>                                                                                                                                                                                          |
| At what age are calves usually given access to water?                                 | ordinal     | <b>1:1-3 weeks 2: 4-8 weeks 3: More than 8 weeks</b>                                                                                                                                                                                                                                                                                    |
| At what age are calves usually given access to creep feed?                            | ordinal     | <b>1:1-3 weeks 2: 4-8 weeks 3: More than 8 weeks</b>                                                                                                                                                                                                                                                                                    |
| How is calf milk feeding equipment routinely cleaned?                                 | categorical | <b>1:rinsed with cold water 2: rinsed with hot water 3: high pressure water 4:washed/scrubbed with cleaning product/disinfected 5: other</b>                                                                                                                                                                                            |
| How often are teats cleaned with disinfectant?                                        | ordinal     | <b>1:Between each calf 2: After each feed 3: Every day 4:Every few days 5: As needed 6: Never7: not applicable, teats not used</b>                                                                                                                                                                                                      |
| How often are buckets cleaned with disinfectant?                                      | ordinal     | <b>1:Between each calf 2: After each feed 3: Every day 4:Every few days 5: As needed 6: Never7: not applicable</b>                                                                                                                                                                                                                      |
| How do you dispose of waste milk?                                                     | categorical | <b>1:Slurry pit 2: Drain 3: Incinerate 4:Fed to calves 5: Fed to other animals on the farm 6: Other</b>                                                                                                                                                                                                                                 |
| If other, please give details                                                         | text        |                                                                                                                                                                                                                                                                                                                                         |
| What kind of manure management facilities are used on farm?                           | categorical | <b>1:Lagoon 2: Weeping wall 3: Metal slurry tank 4:Concrete slurry store 5: Muck heap in field 6: Muck heap on concrete 7: Composting 8: Separator 9: Other</b>                                                                                                                                                                         |
| Has muck from a different farm been brought onto your farm in the last two years?     | categorical | <b>1:yes 2: no 3: Don't know</b>                                                                                                                                                                                                                                                                                                        |
| Which of the following have been spread or stored on your farm in the last two years? | categorical | <b>1:Cattle slurry 2: Cattle FYM 3: Pig slurry 4:Pig FYM 5: Poultry manure 6: AD plant digestate 7: Human sewage sludge 8: Dirty water 9: Food waste</b>                                                                                                                                                                                |
| Which of the following have been brought in from another farm in the last two years?  | categorical | <b>1:Cattle slurry 2: Cattle FYM 3: Pig slurry 4:Pig FYM 5: Poultry manure 6: AD plant digestate 7: Human sewage sludge 8: Dirty water 9: Food waste</b>                                                                                                                                                                                |
| Do you spread any of the following on ground that beef animals graze?                 | categorical | <b>1:Cattle slurry 2: Cattle FYM 3: Pig slurry 4:Pig FYM 5: Poultry manure 6: AD plant digestate 7: Human sewage sludge 8: Dirty water 9: Food waste</b>                                                                                                                                                                                |
| Do you spread any of the following on ground that dairy youngstock graze?             | categorical | <b>1:Cattle slurry 2: Cattle FYM 3: Pig slurry 4:Pig FYM 5: Poultry manure 6: AD plant digestate 7: Human sewage sludge 8: Dirty water 9: Food waste</b>                                                                                                                                                                                |
| Do you spread any of the following on ground that milking or dry cows graze?          | categorical | <b>1:Cattle slurry 2: Cattle FYM 3: Pig slurry 4:Pig FYM 5: Poultry manure 6: AD plant digestate 7: Human sewage sludge 8: Dirty water 9: Food waste</b>                                                                                                                                                                                |

|                                                                                                    |             |                                                                                                                                                                                                                                                                  |
|----------------------------------------------------------------------------------------------------|-------------|------------------------------------------------------------------------------------------------------------------------------------------------------------------------------------------------------------------------------------------------------------------|
| Do you spread any of the following on ground that is used for forage?                              | categorical | <b>1:Cattle slurry 2: Cattle FYM 3: Pig slurry 4:Pig FYM 5: Poultry manure 6: AD plant digestate 7: Human sewage sludge 8: Dirty water 9: Food waste</b>                                                                                                         |
| Are calves/heifers outsourced at any point?                                                        | categorical | <b>1:yes 2: no 3: other</b>                                                                                                                                                                                                                                      |
| If yes, where do they go?                                                                          | categorical | <b>1:A single rearing facility no contact with other cattle 2: Multiple rearing facilities no contact with other cattle 3: Sent to a single rearing facility with contact with other cattle 4:Multiple rearing facilities contact with other cattle 5: Other</b> |
| If other, or mixing with other cattle, give details                                                | text        |                                                                                                                                                                                                                                                                  |
| When do they leave the farm?                                                                       | ordinal     | <b>1:under 4 weeks of age 2: 4-8 weeks old 3: 8-12 weeks old 4:3-6 months 5: 6-12 month 6: 12 months - serving 7: After serving</b>                                                                                                                              |
| When do they return to the farm?                                                                   | ordinal     | <b>1:under 4 weeks of age 2: 4-8 weeks old 3: 8-12 weeks old 4:3-6 months 5: 6-12 month 6: 13 months - serving 7: After serving 8: After PD 9: Pre calving 10: Post calving</b>                                                                                  |
| On average how many miles are they transported to the other site?                                  | text        |                                                                                                                                                                                                                                                                  |
| How many premises does your farm occupy, excluding grazing?                                        | ordinal     | <b>1:one 2: two 3: three 4:four 5: five</b>                                                                                                                                                                                                                      |
| What quarantining procedure do you have in place for incoming stock?                               | categorical | <b>1:complete isolation for 6 weeks 2: complete isolation for less than 6 weeks 3: no shared airspace for 6 weeks 4:no shared airspace for less than 6 weeks 5: Wormed on arrival 6: Given AM on arrival 7: none8: other</b>                                     |
| Do you take your cattle to shows?                                                                  | ordinal     | <b>1:yes frequently 2: yes sometimes 3: no never</b>                                                                                                                                                                                                             |
| Do you sell stock at market?                                                                       | ordinal     | <b>1:yes frequently 2: yes sometimes 3: no never</b>                                                                                                                                                                                                             |
| Are cattle transport vehicles shared with other farms?                                             | ordinal     | <b>1:yes frequently 2: yes sometimes 3: no never</b>                                                                                                                                                                                                             |
| How often are cattle transport vehicles washed?                                                    | ordinal     | <b>1:After every use 2: Every 2-3 uses 3: As needed 4:Weekly 5: Several times a year 6: Less often 7: don't know8: not applicable</b>                                                                                                                            |
| When did you last host a farm walk?                                                                | ordinal     | <b>1:In the last six months 2: In the last year 3: In the last few years 4:never</b>                                                                                                                                                                             |
| When did you last go to another farm on a farm walk?                                               | ordinal     | <b>1:In the last six months 2: In the last year 3: In the last few years 4:never</b>                                                                                                                                                                             |
| Do you ever have non-professional visitors - e.g. schoolchildren, work experience, casual visitors | ordinal     | <b>1:yes frequently 2: yes sometimes 3: no never</b>                                                                                                                                                                                                             |
| Give details of other visitors                                                                     | text        |                                                                                                                                                                                                                                                                  |
| Are all visitors required to wear protective clothing?                                             | ordinal     | <b>1:yes frequently 2: yes sometimes 3: no never</b>                                                                                                                                                                                                             |
| Do feed lorries have to go through the yard when delivering?                                       | categorical | <b>1:yes 2: no 3: other</b>                                                                                                                                                                                                                                      |
| Do you use have a contract muck spreader?                                                          | categorical | <b>1:yes 2: no 3: other</b>                                                                                                                                                                                                                                      |
| If yes, who is your contract muck spreader?                                                        | text        |                                                                                                                                                                                                                                                                  |
| Do you use an external company for AI?                                                             | categorical | <b>1:yes 2: no</b>                                                                                                                                                                                                                                               |

|                                                                                              |             |                                                                     |
|----------------------------------------------------------------------------------------------|-------------|---------------------------------------------------------------------|
| If yes, which company?                                                                       | text        |                                                                     |
| Do you use an external foot trimmer?                                                         | text        |                                                                     |
| If yes, who?                                                                                 | text        |                                                                     |
| Do you share machinery with other farms?                                                     | categorical | <b>1:yes 2: no 3: other</b>                                         |
| Give details of shared machinery and who shared with                                         | text        |                                                                     |
| Are you part of a silage making syndicate?                                                   | categorical | <b>1:yes 2: no 3: other</b>                                         |
| If yes, give details                                                                         | text        |                                                                     |
| Do you use contractors for silage making?                                                    | categorical | <b>1:yes 2: no 3: other</b>                                         |
| If yes, give details                                                                         | text        |                                                                     |
| Do you regularly see the following or signs of the following on your farm, Starlings         | ordinal     | <b>1: Frequently 2: Sometimes 3: Occasionally 4:Rarely 5: never</b> |
| Do you regularly see the following or signs of the following on your farm, Deer              | ordinal     | <b>1: Frequently 2: Sometimes 3: Occasionally 4:Rarely 5: never</b> |
| Do you regularly see the following or signs of the following on your farm, Badger            | ordinal     | <b>1: Frequently 2: Sometimes 3: Occasionally 4:Rarely 5: never</b> |
| Do you regularly see the following or signs of the following on your farm, Rooks             | ordinal     | <b>1: Frequently 2: Sometimes 3: Occasionally 4:Rarely 5: never</b> |
| Do you regularly see the following or signs of the following on your farm, Pigeons and doves | ordinal     | <b>1: Frequently 2: Sometimes 3: Occasionally 4:Rarely 5: never</b> |
| Do you regularly see the following or signs of the following on your farm, Foxes             | ordinal     | <b>1: Frequently 2: Sometimes 3: Occasionally 4:Rarely 5: never</b> |
| Do you regularly see the following or signs of the following on your farm, Gull              | ordinal     | <b>1: Frequently 2: Sometimes 3: Occasionally 4:Rarely 5: never</b> |
| Do you regularly see the following or signs of the following on your farm, Pheasant          | ordinal     | <b>1: Frequently 2: Sometimes 3: Occasionally 4:Rarely 5: never</b> |
| Do you regularly see the following or signs of the following on your farm, Rats              | ordinal     | <b>1: Frequently 2: Sometimes 3: Occasionally 4:Rarely 5: never</b> |
| Does the hunt cross your land?                                                               | ordinal     | <b>1: Frequently 2: Sometimes 3: Occasionally 4:Rarely 5: never</b> |
|                                                                                              |             |                                                                     |
| <b>Questionnaire 4</b>                                                                       |             |                                                                     |
| Does the shoot cross your land?                                                              | ordinal     | <b>1: Frequently 2: Sometimes 3: Occasionally 4:Rarely 5: never</b> |
| Farm ref                                                                                     | text        | <b>Unique farm code - XXX</b>                                       |
| Date                                                                                         | date        |                                                                     |

|                                                                             |             |                                                             |
|-----------------------------------------------------------------------------|-------------|-------------------------------------------------------------|
| Do any of the people who work on your farm live or work on any other farms? | categorical | <b>1: yes 2: no</b>                                         |
| Details of above                                                            | text        |                                                             |
| Do any of the people who live on your farm live or work on any other farms? | categorical | <b>1: yes 2: no</b>                                         |
| Details of above                                                            | text        |                                                             |
| Staff turnover – how many new staff have started in the last 18 months?     | numerical   |                                                             |
| How many have left?                                                         | numerical   |                                                             |
| Details of above                                                            | text        |                                                             |
| Total cattle currently on site                                              | numerical   |                                                             |
| Total dairy herd                                                            | numerical   |                                                             |
| Preweaned dairy calves (still on milk)                                      | numerical   |                                                             |
| Weaned dairy calves (up to 12m)                                             | numerical   |                                                             |
| Dairy heifers 12-24 months                                                  | numerical   |                                                             |
| Dairy heifers over 24 months, not yet calved                                | numerical   |                                                             |
| Bull calves                                                                 | numerical   |                                                             |
| Older beef cattle                                                           | numerical   |                                                             |
| Bulls                                                                       | numerical   |                                                             |
| Comments on above                                                           | text        |                                                             |
| How many sheep have been kept on your farm in the last 18 months?           | numerical   |                                                             |
| How many new sheep have been bought in that time?                           |             |                                                             |
| When did they arrive?                                                       | date        |                                                             |
| Where did they come from?                                                   | categorical | <b>1: market 2: another holding 3: own holding 4: other</b> |
| Comments on sheep                                                           | text        |                                                             |
| How many goats have been kept on your farm in the last 18 months?           | numerical   |                                                             |
| How many goats have arrived in that time?                                   |             |                                                             |
| When did they arrive?                                                       | date        |                                                             |
| Where did they come from?                                                   | categorical | <b>1: market 2: another holding 3: own holding 4: other</b> |
| Comments on goats                                                           | text        |                                                             |

|                                                                            |             |                                                             |
|----------------------------------------------------------------------------|-------------|-------------------------------------------------------------|
| How many pigs have been kept on your farm in the last 18 months?           | numerical   |                                                             |
| How many pigs have arrived in that time?                                   |             |                                                             |
| When did they arrive?                                                      | date        |                                                             |
| Where did they come from?                                                  | categorical | <b>1: market 2: another holding 3: own holding 4: other</b> |
| Comments on pigs                                                           | text        |                                                             |
| How many poultry have been kept on your farm in the last 18 months?        | numerical   |                                                             |
| How many poultry have arrived in that time?                                |             |                                                             |
| When did they arrive?                                                      | date        |                                                             |
| Where did they come from?                                                  | categorical | <b>1: market 2: another holding 3: own holding 4: other</b> |
| Comments on poultry                                                        | text        |                                                             |
| How many horses/donkeys have been kept on your farm in the last 18 months? | numerical   |                                                             |
| How many equines have arrived in that time?                                |             |                                                             |
| When did they arrive?                                                      | date        |                                                             |
| Where did they come from?                                                  | categorical | <b>1: market 2: another holding 3: own holding 4: other</b> |
| Comments on horses/donkeys                                                 | text        |                                                             |
| How many dogs have been kept on your farm in the last 18 months?           | numerical   |                                                             |
| How many dogs arrived in that time?                                        |             |                                                             |
| When did they arrive?                                                      | date        |                                                             |
| Where did they come from?                                                  | categorical | <b>1: market 2: another holding 3: own holding 4: other</b> |
| Comments on dogs                                                           | text        |                                                             |
| How many cats have been kept on your farm in the last 18 months?           | numerical   |                                                             |
| How many cats arrived in that time?                                        |             |                                                             |
| When did they arrive?                                                      | date        |                                                             |
| Where did they come from?                                                  | categorical | <b>1: market 2: another holding 3: own holding 4: other</b> |
| Comments on cats                                                           | text        |                                                             |
| Any other species kept on farm in the last 18 months?                      | text        | <b>text</b>                                                 |
| How many of them?                                                          | numerical   |                                                             |

|                                                       |             |                                                                  |
|-------------------------------------------------------|-------------|------------------------------------------------------------------|
| When did they arrive?                                 | date        |                                                                  |
| Where did they come from?                             | categorical | <b>1: market 2: another holding 3: own holding 4: other</b>      |
| Comments on other species                             | text        |                                                                  |
| Any other species kept on farm in the last 18 months? | text        | <b>text</b>                                                      |
| How many of them?                                     | numerical   |                                                                  |
| When did they arrive?                                 | date        |                                                                  |
| Where did they come from?                             | categorical | <b>1: market 2: another holding 3: own holding 4: other</b>      |
| Comments on other species                             | text        |                                                                  |
| Any other species kept on farm in the last 18 months? | text        | <b>text</b>                                                      |
| How many of them?                                     | numerical   |                                                                  |
| When did they arrive?                                 | date        |                                                                  |
| Where did they come from?                             | categorical | <b>1: market 2: another holding 3: own holding 4: other</b>      |
| Comments on other species                             | text        |                                                                  |
| Preweaned dairy calves (still on milk)                | numerical   |                                                                  |
| Source of preweaned                                   | categorical | <b>1: private market 2: another holding 3: own herd 4: other</b> |
| Dairy heifers (weaned to 12m)                         | numerical   |                                                                  |
| Source of weaned-12m heifers                          | categorical | <b>1: private market 2: another holding 3: own herd 4: other</b> |
| Dairy heifers 12-24 months                            | numerical   |                                                                  |
| Source of 12-24 month heifers                         | categorical | <b>1: private market 2: another holding 3: own herd 4: other</b> |
| Dairy heifers over 24 months, not yet calved          | numerical   |                                                                  |
| Source of over 24 month heifers                       | categorical | <b>1: private market 2: another holding 3: own herd 4: other</b> |
| Dairy cows                                            | numerical   |                                                                  |
| Source of dairy cows                                  | categorical | <b>1: private market 2: another holding 3: own herd 4: other</b> |
| Bull calves                                           | numerical   |                                                                  |
| Source of bull calves                                 | categorical | <b>1: private market 2: another holding 3: own herd 4: other</b> |
| Older beef cattle                                     | numerical   |                                                                  |
| Source of older beef cattle                           | categorical | <b>1: private market 2: another holding 3: own herd 4: other</b> |
| Bulls                                                 | numerical   |                                                                  |
| Source of bulls                                       | categorical | <b>1: private market 2: another holding 3: own herd 4: other</b> |
| Any comments about cattle bought in?                  | text        |                                                                  |

|                                                                                            |             |                                                                                                                                                                  |
|--------------------------------------------------------------------------------------------|-------------|------------------------------------------------------------------------------------------------------------------------------------------------------------------|
| What is your calving pattern?                                                              | categorical | <b>1: tight block 2: loose block 3: most of the year with a few months off 4: all year spread evenly 5: all year but concentrated at certain times 6: other.</b> |
| During which months did cows calve last year?                                              | text        |                                                                                                                                                                  |
| Average age at first calving                                                               | numerical   |                                                                                                                                                                  |
| Did the heifers in this study have AI?                                                     | categorical | <b>1: yes 2: no</b>                                                                                                                                              |
| Did the heifers in this study have natural service?                                        | categorical | <b>1: yes 2: no</b>                                                                                                                                              |
| Average number of serves/conception                                                        | numerical   |                                                                                                                                                                  |
| Total annual milk sales                                                                    | numerical   |                                                                                                                                                                  |
| Milk price average over 12 months                                                          | numerical   |                                                                                                                                                                  |
| 305 day milk yield (12 month rolling average)                                              | numerical   |                                                                                                                                                                  |
| Annual yield                                                                               |             |                                                                                                                                                                  |
| Somatic cell count (12 month rolling average)                                              | numerical   |                                                                                                                                                                  |
| Bactoscan (12 month rolling average)                                                       | numerical   |                                                                                                                                                                  |
| Number of milkings per day                                                                 | categorical | <b>1: one 2: two 3: three</b>                                                                                                                                    |
| Milking system used (e.g. herringbone, abreast, rotary, robot)                             | categorical | <b>1: herringbone 2: abreast 3: rotary 4: side-opening 5: robot</b>                                                                                              |
| Percentage of cows in which antibiotic dry-cow tubes were used at dry-off in the last year | numerical   |                                                                                                                                                                  |
| Percentage of cows in which systemic antibiotics were used at dry-off in the last year?    | numerical   |                                                                                                                                                                  |
| Cull rate excluding TB                                                                     | numerical   |                                                                                                                                                                  |
| Cull rate due to TB                                                                        | numerical   |                                                                                                                                                                  |
| No of cow deaths on farm in the last 12 months                                             |             |                                                                                                                                                                  |
| Any significant events?                                                                    | freetext    |                                                                                                                                                                  |



## Supplementary Figures

**Figure S1:** Effect of minimum *bla*<sub>CTX-M</sub> *E. coli* prevalence ( $q$ ) on the output of the risk factor model using the total dataset. Variable codes are: “preweaned\_heifer”, sample collected from a pre-weaned heifer (Calf sample); “s\_temp”, average monthly temperature; “weaned\_heifer”, sample collected from a weaned heifer (Heifer sample); “s\_housed\_outdoor”, sample collected from pastureland; “f\_foragetype\_3”, maize silage used on farm.

**A:** The effect on the model estimates for different values of  $q$ .

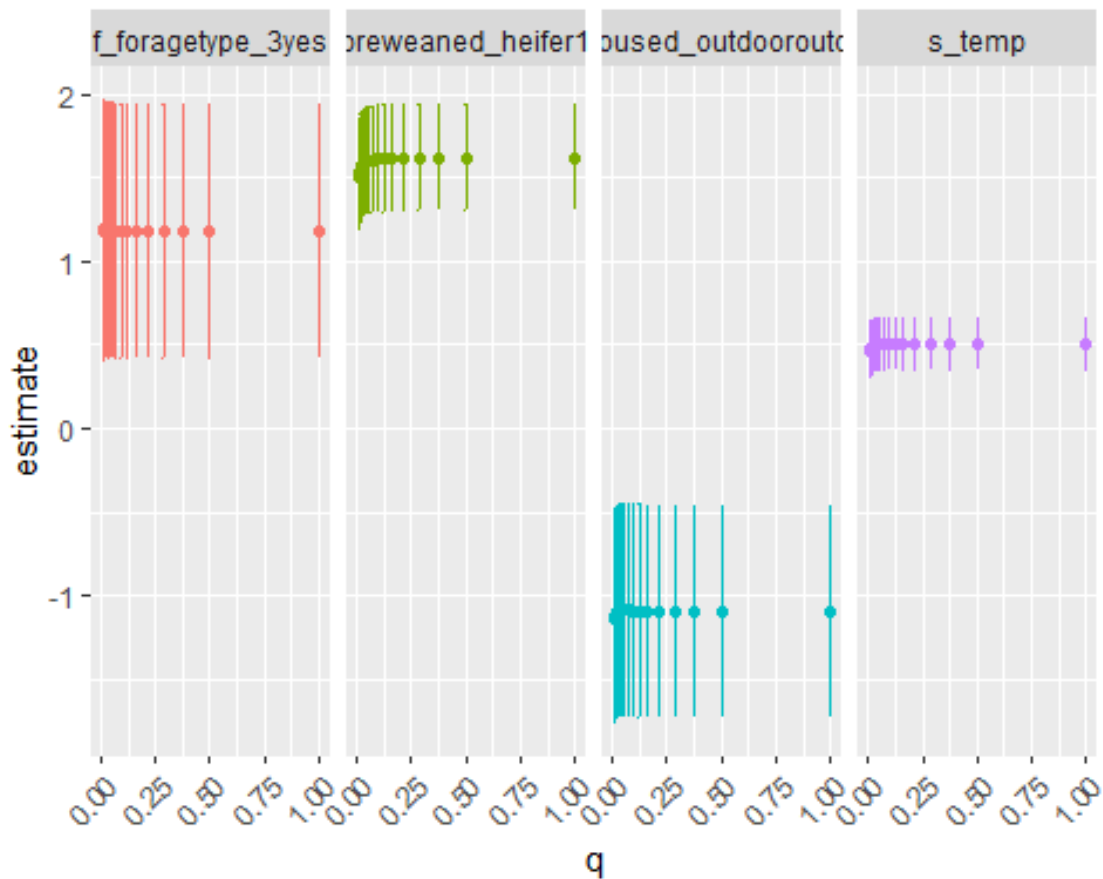

**B:** Effect on the predictive accuracy of the model with different values of  $q$ , measured as the area under the Receiver Operating Characteristic Curve.

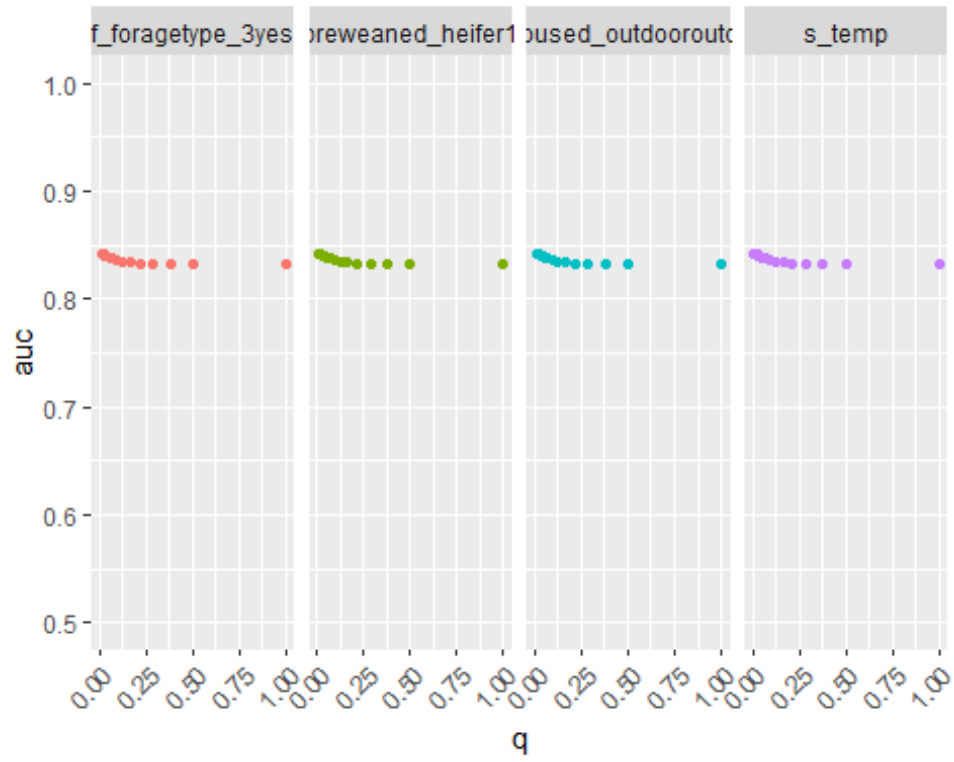

**Figure S2:** Flow diagram to demonstrate the various stages used to arrive at the final dataset used in analyses for CTX-M carriage.

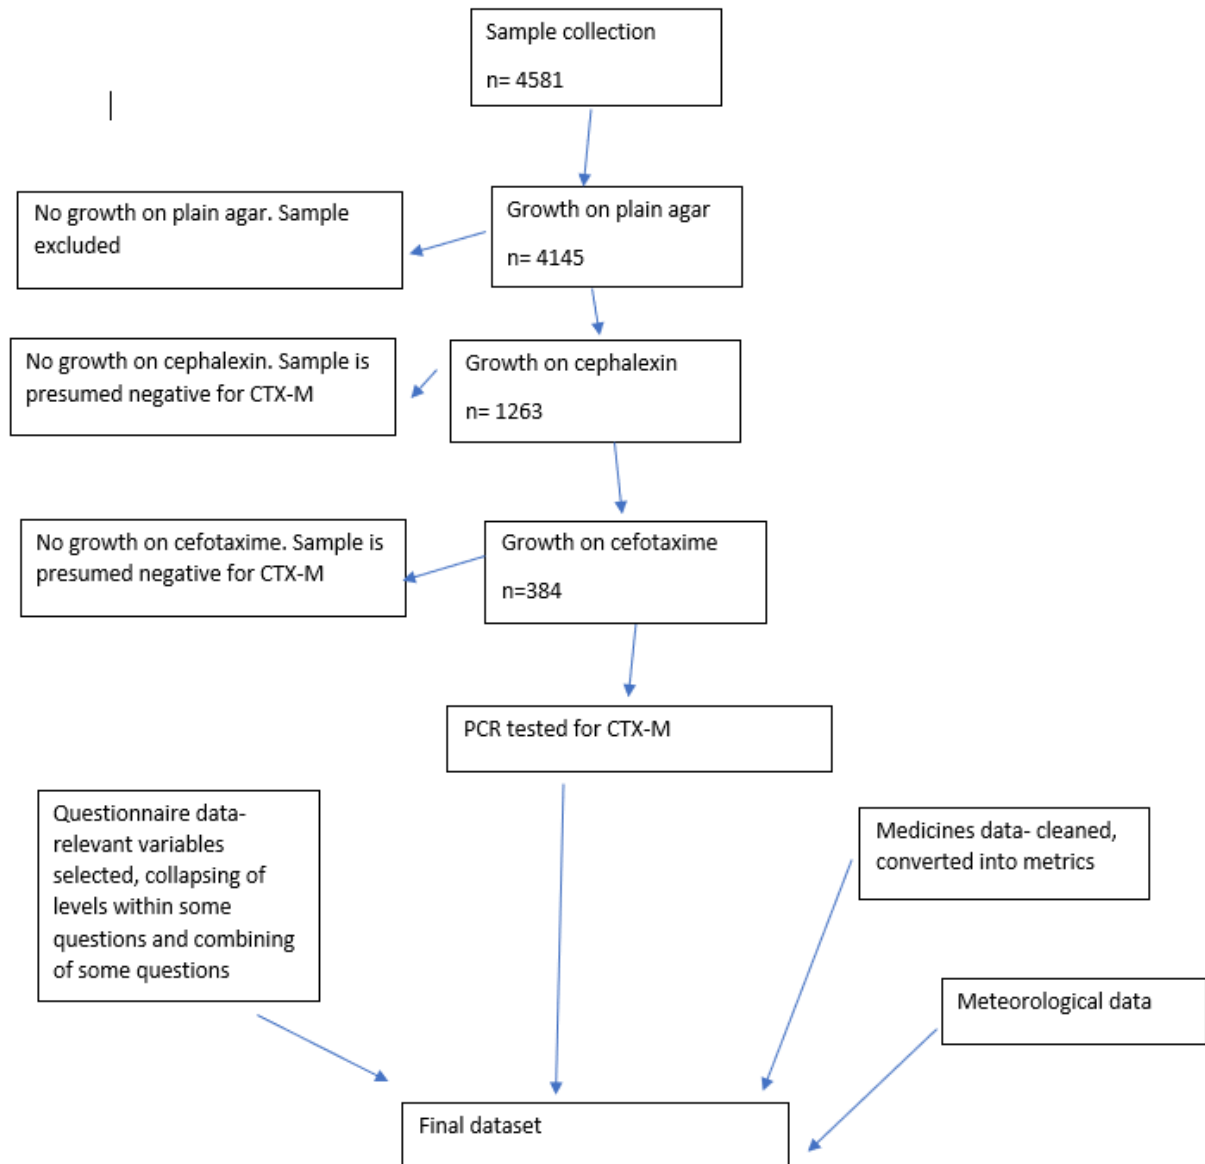

**Figure S3:** Model checking outputs for all models.

### Calf CTX-M

```
## Generalized linear mixed model fit by maximum likelihood (Laplace
## Approximation) [glmerMod]
## Family: binomial ( logit )
## Formula:
## ctx_m ~ s_temp + f_trough_clean + s_cefq_dct_6m + s_fram_dct_6m +
## (1 | farm)
## Data: df_with_na
##
##      AIC      BIC  logLik deviance df.resid
##  484.2    511.0  -236.1   472.2     627
##
## Scaled residuals:
##      Min       1Q   Median       3Q      Max
## -1.6504 -0.4324 -0.2660 -0.1882  4.7361
##
## Random effects:
## Groups Name          Variance Std.Dev.
## farm   (Intercept)  0.1752   0.4185
## Number of obs: 633, groups: farm, 51
##
## Fixed effects:
##              Estimate Std. Error z value Pr(>|z|)
## (Intercept)    -2.2792    0.2142 -10.639 < 2e-16 ***
## s_temp          0.4436    0.1305   3.400 0.000673 ***
## f_trough_clean.L -0.7308    0.2039  -3.585 0.000338 ***
## s_cefq_dct_6m1  1.3697    0.3157   4.339 1.43e-05 ***
## s_fram_dct_6m1  0.5931    0.2974   1.994 0.046146 *
## ---
## Signif. codes:  0 '***' 0.001 '**' 0.01 '*' 0.05 '.' 0.1 ' ' 1
##
## Correlation of Fixed Effects:
##              (Intr) s_temp f_t_.L s_c__61
## s_temp      -0.076
## f_trgh_cl.L  0.019  0.065
## s_cfq_dc_61 -0.470 -0.103 -0.173
## s_frm_dc_61 -0.431 -0.307 -0.011  0.081
```

### Main CTX-M

```
## Generalized linear mixed model fit by maximum likelihood (Laplace
## Approximation) [glmerMod]
## Family: binomial ( logit )
## Formula:
## ctx_m ~ s_temp + s_housed_outdoor + f_foragetype_3
## + preweaned_heifer +
## (1 | farm)
## Data: df
##
##      AIC      BIC  logLik deviance df.resid
## 1495.2    1533.2  -741.6   1483.2     4139
##
```

```

## Scaled residuals:
##      Min       1Q   Median       3Q      Max
## -1.0491 -0.2323 -0.1547 -0.1017 11.4370
##
## Random effects:
##   Groups Name          Variance Std.Dev.
##   farm   (Intercept) 0.7928   0.8904
## Number of obs: 4145, groups: farm, 53
##
## Fixed effects:
##              Estimate Std. Error z value Pr(>|z|)
## (Intercept)    -4.58459    0.35626  -12.869 < 2e-16 ***
## s_temp          0.51227    0.07978   6.421 1.35e-10 ***
## s_housed_outdoor -1.09774    0.31778  -3.454 0.000552 ***
## f_foragetype_3yes  1.17822    0.37909   3.108 0.001883 **
## preweaned_heifer1  1.62387    0.15979  10.163 < 2e-16 ***
## ---
## Signif. codes:  0 '***' 0.001 '**' 0.01 '*' 0.05 '.' 0.1 ' ' 1
##
## Correlation of Fixed Effects:
##              (Intr) s_temp s_hsd_ f_fr_3
## s_temp        -0.087
## s_hsd_tdrtd  -0.081 -0.149
## f_frgtyp_3y  -0.858  0.009  0.006
## prewnd_hfr1  -0.218  0.020  0.191  0.028

```

## Amox

```

## Family: bernoulli
## Links: mu = identity
## Formula: amoxR ~ (sens + spec - 1)/(1 + exp(-eta)) + (1 - spec)
##          eta ~ main + reg + rand
##          main ~ total_mg_pcu + tet + fq + amox + cefalexin + strep +
##          ceph_1 + co_amox + pen + me(s_temp, 0.61)
##          rand ~ 0 + (1 | farm)
##          reg ~ 0 + weaned_heifer + adult + dry + footpath
+ f_anything_waste + f_heifers_waste + f_whichclinresp + f_firstmastitis +
  f_poultry + f_equine + f_total_cattle + f_yield + f_herd_size + f_bought_
pre + f_scc + f_pneum_vacc + f_diarrvacc + f_anticocc + f_halocur + f_nsai
ddiarr + f_trough_clean + f_time_dam + f_um_spray + f_give_col + f_wean +
f_geographical_area + f_pattern + s_rain + f_percentdryoff + f_calving_gro
up + f_calf_housing_type + f_calf_housing_older + f_hectares + f_othergraz
e + f_bvdvacc + f_ibrvacc + f_leptovacc + f_salmvacc + f_lungvacc + f_clos
tvacc + f_organic + f_daystreatmast + f_timesfirstmast + f_injectmast + f_
nsaidmast + f_treatfoot + f_abcalve + f_nsaidcalve + f_calveclean + f_milk
graze + f_lime + f_predip + f_acf + f_cleancluster + f_drytrough + f_premi
ses + f_shows + f_market + f_hostfarmwalk + f_starling + f_deer + f_badger
+ f_rook + f_pigeon + f_fox + f_pheasant + f_rat + f_shoot + f_hunt + f_o
utsource + f_feedlorry + f_muckspreader + f_aiexternal + f_machinery +
f_bedmilk_1 + f_bedmilk_2 + f_bedmilk_3 + f_bedmilk_4 + f_bedmilk_6 +
f_bedmilk_8 + f_foragetype_1 + f_foragetype_2 + f_foragetype_3 +
f_foragetype_4 + f_foragetype_5 + f_foragetype_6 + f_foragetype_7 +
f_foragetype_8 + f_manure_1 + f_manure_2 + f_manure_3 + f_manure_4 +
f_manure_5 + f_manure_6 + f_manure_7 + f_manure_8 + f_manure_9
+ s_housed_outdoor + f_cefq_dct + f_ceph_dct + f_fram_dct + f_clox_dct + s

```

```

_calving_now + f_water + preweaned_heifer
## Data: df (Number of observations: 4145)
## Samples: 4 chains, each with iter = 10000; warmup = 1000; thin = 2;
## total post-warmup samples = 18000
##
## Group-Level Effects:
## ~farm (Number of levels: 53)
## Estimate Est.Error l-95% CI u-95% CI Rhat Bulk_ESS
## sd(rand_Intercept) 0.37 0.15 0.05 0.64 1.00 4046
## Tail_ESS
## sd(rand_Intercept) 5375
##
## Population-Level Effects:
## Estimate Est.Error l-95% CI
## main_Intercept 1.52 0.49 0.51
## main_total_mg_pcu 0.48 0.29 -0.09
## main_tet 0.07 0.14 -0.19
## main_fq 0.09 0.13 -0.17
## main_amox 0.07 0.16 -0.24
## main_cefalexin -0.05 0.17 -0.39
## main_strep -0.13 0.12 -0.36
## main_ceph_1 -0.09 0.19 -0.46
## main_co_amox 0.22 0.22 -0.20
## main_pen -0.34 0.43 -1.17
## reg_weaned_heifer0 0.06 0.12 -0.06
## reg_weaned_heifer1 -0.06 0.12 -0.39
## reg_adult1 0.02 0.07 -0.09
## reg_dry1 -0.01 0.07 -0.19
## reg_footpath1 0.01 0.07 -0.12
## reg_f_anything_waste1 0.03 0.09 -0.08
## reg_f_heifers_waste1 0.01 0.07 -0.12
## reg_f_whichclinrespMacrolide -0.00 0.07 -0.15
## reg_f_whichclinrespOtherDdontknow 0.02 0.14 -0.17
## reg_f_whichclinrespPenicillimoxycillin -0.03 0.17 -0.49
## reg_f_whichclinrespTetracycline -0.00 0.07 -0.17
## reg_f_firstmastitisCobactan -0.01 0.14 -0.32
## reg_f_firstmastitisMastiplanLC -0.03 0.18 -0.49
## reg_f_firstmastitisOrbeninLA 0.05 0.27 -0.15
## reg_f_firstmastitistdDmultiject 0.16 0.24 -0.05
## reg_f_firstmastitisUbroYellow -0.01 0.08 -0.19
## reg_f_firstmastitisUbrolexin -0.05 0.15 -0.54
## reg_f_poultry1 0.06 0.13 -0.06
## reg_f_equine1 0.04 0.10 -0.08
## reg_f_total_cattle 0.00 0.05 -0.09
## reg_f_yield 0.02 0.05 -0.07
## reg_f_herd_size 0.01 0.05 -0.09
## reg_f_bought_pre 0.01 0.05 -0.08
## reg_f_scc -0.00 0.04 -0.09
## reg_f_pneum_vacc1 0.01 0.07 -0.12
## reg_f_diarrvaccY -0.03 0.09 -0.31
## reg_f_anticocc1 -0.01 0.07 -0.17
## reg_f_halocur1 0.01 0.07 -0.11
## reg_f_nsaiddiarr1 -0.01 0.07 -0.20
## reg_f_trough_clean.L 0.02 0.06 -0.07

```

|                              |       |      |       |
|------------------------------|-------|------|-------|
| ## reg_f_time_dam.L          | 0.02  | 0.07 | -0.08 |
| ## reg_f_um_spray1           | 0.02  | 0.10 | -0.11 |
| ## reg_f_give_col1           | 0.00  | 0.07 | -0.14 |
| ## reg_f_wean2               | -0.01 | 0.08 | -0.24 |
| ## reg_f_wean3               | -0.01 | 0.07 | -0.16 |
| ## reg_f_geographical_area2  | 0.02  | 0.09 | -0.08 |
| ## reg_f_geographical_area3  | 0.01  | 0.07 | -0.12 |
| ## reg_f_pattern2            | 0.03  | 0.11 | -0.10 |
| ## reg_s_rain                | 0.02  | 0.04 | -0.04 |
| ## reg_f_percentdryoff       | 0.03  | 0.06 | -0.05 |
| ## reg_f_calving_group1      | 0.01  | 0.08 | -0.13 |
| ## reg_f_calf_housing_type2  | 0.01  | 0.07 | -0.10 |
| ## reg_f_calf_housing_type3  | -0.07 | 0.14 | -0.50 |
| ## reg_f_calf_housing_older1 | -0.01 | 0.08 | -0.22 |
| ## reg_f_hectares            | -0.02 | 0.05 | -0.16 |
| ## reg_f_othergrazeY         | -0.03 | 0.09 | -0.28 |
| ## reg_f_bvdvaccY            | 0.01  | 0.07 | -0.12 |
| ## reg_f_ibrvaccY            | -0.01 | 0.07 | -0.20 |
| ## reg_f_leptovaccY          | -0.00 | 0.07 | -0.17 |
| ## reg_f_salmvaccY           | -0.04 | 0.17 | -0.54 |
| ## reg_f_lungvaccY           | -0.11 | 0.19 | -0.62 |
| ## reg_f_clostvaccY          | -0.04 | 0.13 | -0.45 |
| ## reg_f_organic1            | -0.02 | 0.12 | -0.34 |
| ## reg_f_daystreatmast       | 0.02  | 0.06 | -0.06 |
| ## reg_f_timesfirstmast      | -0.02 | 0.05 | -0.16 |
| ## reg_f_injectmast          | -0.01 | 0.06 | -0.16 |
| ## reg_f_nsaidmast           | -0.03 | 0.07 | -0.22 |
| ## reg_f_treatfoot1          | -0.00 | 0.06 | -0.14 |
| ## reg_f_abcalve1            | 0.02  | 0.09 | -0.11 |
| ## reg_f_nsaidcalve1         | -0.00 | 0.06 | -0.14 |
| ## reg_f_calveclean.L        | -0.01 | 0.06 | -0.15 |
| ## reg_f_milkgraze1          | -0.00 | 0.08 | -0.18 |
| ## reg_f_lime1               | 0.05  | 0.12 | -0.07 |
| ## reg_f_predip1             | 0.04  | 0.11 | -0.07 |
| ## reg_f_acf1                | -0.07 | 0.14 | -0.50 |
| ## reg_f_cleancluster.L      | -0.03 | 0.08 | -0.27 |
| ## reg_f_drytrough.L         | -0.01 | 0.06 | -0.15 |
| ## reg_f_premises2           | -0.01 | 0.07 | -0.17 |
| ## reg_f_shows1              | 0.16  | 0.33 | -0.08 |
| ## reg_f_market1             | -0.01 | 0.07 | -0.18 |
| ## reg_f_hostfarmwalk1       | 0.02  | 0.08 | -0.10 |
| ## reg_f_starling2           | -0.00 | 0.07 | -0.16 |
| ## reg_f_deer2               | -0.04 | 0.11 | -0.38 |
| ## reg_f_badger2             | 0.04  | 0.13 | -0.10 |
| ## reg_f_rook2               | 0.03  | 0.09 | -0.09 |
| ## reg_f_pigeon2             | 0.00  | 0.06 | -0.12 |
| ## reg_f_fox2                | -0.04 | 0.10 | -0.34 |
| ## reg_f_pheasant2           | 0.01  | 0.08 | -0.14 |
| ## reg_f_rat2                | 0.01  | 0.07 | -0.12 |
| ## reg_f_shoot2              | -0.03 | 0.10 | -0.34 |
| ## reg_f_hunt2               | -0.01 | 0.07 | -0.21 |
| ## reg_f_outsource1          | 0.01  | 0.10 | -0.13 |
| ## reg_f_feedlorry1          | 0.02  | 0.08 | -0.08 |
| ## reg_f_muckspreader1       | -0.00 | 0.07 | -0.15 |

|                                 |          |      |          |          |
|---------------------------------|----------|------|----------|----------|
| ## reg_f_muckspreader3          | -0.01    | 0.13 | -0.29    |          |
| ## reg_f_aiexternal1            | 0.01     | 0.07 | -0.10    |          |
| ## reg_f_machinery1             | -0.03    | 0.09 | -0.30    |          |
| ## reg_f_bedmilk_1yes           | -0.05    | 0.12 | -0.42    |          |
| ## reg_f_bedmilk_2yes           | 0.02     | 0.08 | -0.10    |          |
| ## reg_f_bedmilk_3yes           | -0.00    | 0.06 | -0.15    |          |
| ## reg_f_bedmilk_4yes           | 0.01     | 0.13 | -0.18    |          |
| ## reg_f_bedmilk_6yes           | 0.03     | 0.16 | -0.16    |          |
| ## reg_f_bedmilk_8yes           | -0.01    | 0.16 | -0.32    |          |
| ## reg_f_foragetype_1yes        | 0.01     | 0.11 | -0.14    |          |
| ## reg_f_foragetype_2yes        | -0.10    | 0.23 | -0.84    |          |
| ## reg_f_foragetype_3yes        | 0.06     | 0.14 | -0.08    |          |
| ## reg_f_foragetype_4yes        | 0.02     | 0.07 | -0.09    |          |
| ## reg_f_foragetype_5yes        | -0.00    | 0.07 | -0.16    |          |
| ## reg_f_foragetype_6yes        | 0.01     | 0.09 | -0.14    |          |
| ## reg_f_foragetype_7yes        | -0.01    | 0.08 | -0.21    |          |
| ## reg_f_foragetype_8yes        | -0.03    | 0.17 | -0.51    |          |
| ## reg_f_manure_1yes            | 0.04     | 0.12 | -0.07    |          |
| ## reg_f_manure_2yes            | -0.01    | 0.08 | -0.19    |          |
| ## reg_f_manure_3yes            | 0.03     | 0.10 | -0.09    |          |
| ## reg_f_manure_4yes            | -0.07    | 0.14 | -0.49    |          |
| ## reg_f_manure_5yes            | -0.00    | 0.07 | -0.16    |          |
| ## reg_f_manure_6yes            | 0.02     | 0.08 | -0.08    |          |
| ## reg_f_manure_7yes            | 0.02     | 0.12 | -0.15    |          |
| ## reg_f_manure_8yes            | 0.01     | 0.09 | -0.15    |          |
| ## reg_f_manure_9yes            | 0.03     | 0.16 | -0.14    |          |
| ## reg_s_housed_outdooroutdoor  | -1.29    | 0.16 | -1.61    |          |
| ## reg_f_cefq_dct1              | -0.00    | 0.08 | -0.17    |          |
| ## reg_f_ceph_dct1              | 0.00     | 0.07 | -0.14    |          |
| ## reg_f_fram_dct1              | -0.01    | 0.07 | -0.18    |          |
| ## reg_f_clox_dct1              | -0.00    | 0.07 | -0.17    |          |
| ## reg_s_calving_now1           | 0.03     | 0.09 | -0.07    |          |
| ## reg_f_water1                 | 0.00     | 0.07 | -0.14    |          |
| ## reg_preweaned_heifer1        | 0.69     | 0.21 | 0.25     |          |
| ## main_mes_temp0.61            | 0.65     | 0.10 | 0.45     |          |
| ##                              | u-95% CI | Rhat | Bulk_ESS | Tail_ESS |
| ## main_Intercept               | 2.50     | 1.00 | 10713    | 13015    |
| ## main_total_mg_pcu            | 1.05     | 1.00 | 11833    | 14336    |
| ## main_tet                     | 0.34     | 1.00 | 13464    | 15883    |
| ## main_fq                      | 0.36     | 1.00 | 12740    | 16011    |
| ## main_amox                    | 0.39     | 1.00 | 12053    | 15621    |
| ## main_cefalexin               | 0.28     | 1.00 | 12817    | 15945    |
| ## main_strep                   | 0.10     | 1.00 | 12954    | 15149    |
| ## main_ceph_1                  | 0.27     | 1.00 | 13369    | 15169    |
| ## main_co_amox                 | 0.65     | 1.00 | 12572    | 14891    |
| ## main_pen                     | 0.51     | 1.00 | 11102    | 13559    |
| ## reg_weaned_heifer0           | 0.38     | 1.00 | 14120    | 16139    |
| ## reg_weaned_heifer1           | 0.06     | 1.00 | 13989    | 16572    |
| ## reg_adult1                   | 0.22     | 1.00 | 14598    | 15753    |
| ## reg_dry1                     | 0.11     | 1.00 | 14843    | 16522    |
| ## reg_footpath1                | 0.17     | 1.00 | 14691    | 15162    |
| ## reg_f_anything_waste1        | 0.30     | 1.00 | 14436    | 14703    |
| ## reg_f_heifers_waste1         | 0.17     | 1.00 | 15682    | 16744    |
| ## reg_f_whichclinrespMacrolide | 0.14     | 1.00 | 15373    | 15173    |



|                                           |      |      |       |       |
|-------------------------------------------|------|------|-------|-------|
| ## reg_f_whichclinrespOtherDdontknow      | 0.35 | 1.00 | 14910 | 15191 |
| ## reg_f_whichclinrespPenicillimoxycillin | 0.16 | 1.00 | 14773 | 14935 |
| ## reg_f_whichclinrespTetracycline        | 0.14 | 1.00 | 14969 | 15595 |
| ## reg_f_firstmastitisCobactan            | 0.17 | 1.00 | 14264 | 14918 |
| ## reg_f_firstmastitisMastiplanLC         | 0.16 | 1.00 | 14521 | 15427 |
| ## reg_f_firstmastitisOrbeninLA           | 0.78 | 1.00 | 14811 | 12465 |
| ## reg_f_firstmastitistdDmultiject        | 0.80 | 1.00 | 6189  | 8388  |
| ## reg_f_firstmastitisUbroYellow          | 0.14 | 1.00 | 15770 | 16200 |
| ## reg_f_firstmastitisUbrolexin           | 0.11 | 1.00 | 14020 | 14522 |
| ## reg_f_poultry1                         | 0.47 | 1.00 | 12773 | 12284 |
| ## reg_f_equine1                          | 0.35 | 1.00 | 14817 | 15750 |
| ## reg_f_total_cattle                     | 0.12 | 1.00 | 15727 | 15971 |
| ## reg_f_yield                            | 0.17 | 1.00 | 14982 | 15817 |
| ## reg_f_herd_size                        | 0.12 | 1.00 | 15992 | 14986 |
| ## reg_f_bought_pre                       | 0.13 | 1.00 | 14649 | 15882 |
| ## reg_f_scc                              | 0.09 | 1.00 | 15206 | 16283 |
| ## reg_f_pneum_vacc1                      | 0.19 | 1.00 | 15471 | 16243 |
| ## reg_f_diarrvaccY                       | 0.08 | 1.00 | 14037 | 15070 |
| ## reg_f_anticocc1                        | 0.13 | 1.00 | 14409 | 14245 |
| ## reg_f_halocur1                         | 0.21 | 1.00 | 15380 | 14935 |
| ## reg_f_nsaiddiarr1                      | 0.11 | 1.00 | 14571 | 15146 |
| ## reg_f_trough_clean.L                   | 0.20 | 1.00 | 13457 | 15701 |
| ## reg_f_time_dam.L                       | 0.21 | 1.00 | 14027 | 14568 |
| ## reg_f_um_spray1                        | 0.31 | 1.00 | 14509 | 14783 |
| ## reg_f_give_col1                        | 0.17 | 1.00 | 15692 | 15296 |
| ## reg_f_wean2                            | 0.12 | 1.00 | 15104 | 14909 |
| ## reg_f_wean3                            | 0.12 | 1.00 | 15995 | 16195 |
| ## reg_f_geographical_area2               | 0.28 | 1.00 | 14125 | 15558 |
| ## reg_f_geographical_area3               | 0.18 | 1.00 | 15162 | 15191 |
| ## reg_f_pattern2                         | 0.36 | 1.00 | 13522 | 14774 |
| ## reg_s_rain                             | 0.11 | 1.00 | 14801 | 16761 |
| ## reg_f_percentdryoff                    | 0.20 | 1.00 | 13560 | 15612 |
| ## reg_f_calving_group1                   | 0.22 | 1.00 | 14011 | 15321 |
| ## reg_f_calf_housing_type2               | 0.19 | 1.00 | 15102 | 15967 |
| ## reg_f_calf_housing_type3               | 0.07 | 1.00 | 11543 | 14538 |
| ## reg_f_calf_housing_older1              | 0.12 | 1.00 | 15289 | 15516 |
| ## reg_f_hectares                         | 0.06 | 1.00 | 13610 | 15717 |
| ## reg_f_othergrazeY                      | 0.08 | 1.00 | 13977 | 15367 |
| ## reg_f_bvdvaccY                         | 0.17 | 1.00 | 14994 | 15404 |
| ## reg_f_ibrvaccY                         | 0.11 | 1.00 | 15562 | 15558 |
| ## reg_f_leptovaccY                       | 0.14 | 1.00 | 14712 | 16163 |
| ## reg_f_salmvaccY                        | 0.13 | 1.00 | 12983 | 12830 |
| ## reg_f_lungvaccY                        | 0.05 | 1.00 | 8645  | 14041 |
| ## reg_f_clostvaccY                       | 0.09 | 1.00 | 14007 | 14881 |
| ## reg_f_organic1                         | 0.12 | 1.00 | 14029 | 14411 |
| ## reg_f_daystreatmast                    | 0.19 | 1.00 | 14568 | 16152 |
| ## reg_f_timesfirstmast                   | 0.06 | 1.00 | 14065 | 15660 |
| ## reg_f_injectmast                       | 0.08 | 1.00 | 15302 | 15963 |
| ## reg_f_nsaidmast                        | 0.05 | 1.00 | 13148 | 15620 |
| ## reg_f_treatfoot1                       | 0.13 | 1.00 | 15373 | 14548 |
| ## reg_f_abcalve1                         | 0.27 | 1.00 | 14530 | 13892 |
| ## reg_f_nsaidcalve1                      | 0.13 | 1.00 | 14675 | 15802 |
| ## reg_f_calveclean.L                     | 0.11 | 1.00 | 14118 | 15841 |
| ## reg_f_milkgraze1                       | 0.16 | 1.00 | 14951 | 15053 |

|                                |       |      |       |       |
|--------------------------------|-------|------|-------|-------|
| ## reg_f_lime1                 | 0.42  | 1.00 | 13090 | 14427 |
| ## reg_f_predip1               | 0.37  | 1.00 | 11861 | 13403 |
| ## reg_f_acf1                  | 0.07  | 1.00 | 11402 | 13584 |
| ## reg_f_cleancluster.L        | 0.07  | 1.00 | 14170 | 14824 |
| ## reg_f_drytrough.L           | 0.09  | 1.00 | 14005 | 16142 |
| ## reg_f_premises2             | 0.11  | 1.00 | 15021 | 15678 |
| ## reg_f_shows1                | 1.20  | 1.00 | 7296  | 8773  |
| ## reg_f_market1               | 0.13  | 1.00 | 14978 | 14763 |
| ## reg_f_hostfarmwalk1         | 0.25  | 1.00 | 14077 | 15375 |
| ## reg_f_starling2             | 0.13  | 1.00 | 15270 | 15658 |
| ## reg_f_deer2                 | 0.09  | 1.00 | 13071 | 12734 |
| ## reg_f_badger2               | 0.44  | 1.00 | 13048 | 12992 |
| ## reg_f_rook2                 | 0.30  | 1.00 | 14037 | 14353 |
| ## reg_f_pigeon2               | 0.15  | 1.00 | 15779 | 16784 |
| ## reg_f_fox2                  | 0.08  | 1.00 | 14110 | 14442 |
| ## reg_f_pheasant2             | 0.20  | 1.00 | 15081 | 15592 |
| ## reg_f_rat2                  | 0.18  | 1.00 | 15070 | 14560 |
| ## reg_f_shoot2                | 0.08  | 1.00 | 12748 | 12430 |
| ## reg_f_hunt2                 | 0.10  | 1.00 | 15381 | 14947 |
| ## reg_f_outsource1            | 0.26  | 1.00 | 14601 | 15497 |
| ## reg_f_feedlorry1            | 0.28  | 1.00 | 14901 | 14889 |
| ## reg_f_muckspreader1         | 0.14  | 1.00 | 15233 | 16298 |
| ## reg_f_muckspreader3         | 0.17  | 1.00 | 14699 | 15280 |
| ## reg_f_aiexternal1           | 0.21  | 1.00 | 14041 | 15388 |
| ## reg_f_machinery1            | 0.08  | 1.00 | 14336 | 14955 |
| ## reg_f_bedmilk_1yes          | 0.07  | 1.00 | 12780 | 13848 |
| ## reg_f_bedmilk_2yes          | 0.24  | 1.00 | 14793 | 15073 |
| ## reg_f_bedmilk_3yes          | 0.13  | 1.00 | 14572 | 14841 |
| ## reg_f_bedmilk_4yes          | 0.30  | 1.00 | 14795 | 14485 |
| ## reg_f_bedmilk_6yes          | 0.43  | 1.00 | 14227 | 14267 |
| ## reg_f_bedmilk_8yes          | 0.19  | 1.00 | 15305 | 14681 |
| ## reg_f_foragetype_1yes       | 0.29  | 1.00 | 15111 | 15165 |
| ## reg_f_foragetype_2yes       | 0.08  | 1.00 | 9588  | 10915 |
| ## reg_f_foragetype_3yes       | 0.49  | 1.00 | 12802 | 12925 |
| ## reg_f_foragetype_4yes       | 0.22  | 1.00 | 15066 | 14983 |
| ## reg_f_foragetype_5yes       | 0.14  | 1.00 | 15191 | 15851 |
| ## reg_f_foragetype_6yes       | 0.23  | 1.00 | 15572 | 15191 |
| ## reg_f_foragetype_7yes       | 0.12  | 1.00 | 14592 | 15019 |
| ## reg_f_foragetype_8yes       | 0.14  | 1.00 | 14031 | 14930 |
| ## reg_f_manure_1yes           | 0.41  | 1.00 | 11979 | 12291 |
| ## reg_f_manure_2yes           | 0.15  | 1.00 | 15319 | 15134 |
| ## reg_f_manure_3yes           | 0.32  | 1.00 | 14653 | 14673 |
| ## reg_f_manure_4yes           | 0.06  | 1.00 | 11777 | 13215 |
| ## reg_f_manure_5yes           | 0.14  | 1.00 | 15706 | 16055 |
| ## reg_f_manure_6yes           | 0.25  | 1.00 | 15047 | 16194 |
| ## reg_f_manure_7yes           | 0.31  | 1.00 | 14876 | 14709 |
| ## reg_f_manure_8yes           | 0.21  | 1.00 | 14967 | 15129 |
| ## reg_f_manure_9yes           | 0.52  | 1.00 | 14235 | 12668 |
| ## reg_s_housed_outdooroutdoor | -0.99 | 1.00 | 16704 | 17067 |
| ## reg_f_cefq_dct1             | 0.16  | 1.00 | 15128 | 15600 |
| ## reg_f_ceph_dct1             | 0.16  | 1.00 | 14186 | 15277 |
| ## reg_f_fram_dct1             | 0.12  | 1.00 | 14680 | 16601 |
| ## reg_f_clox_dct1             | 0.14  | 1.00 | 15218 | 15005 |
| ## reg_s_calving_now1          | 0.32  | 1.00 | 13435 | 16059 |

```

## reg_f_water1                0.16 1.00    15475    15840
## reg_preweaned_heifer1      1.09 1.00    14460    14131
## main_mes_temp0.61          0.85 1.00    14065    15924
##
## Samples were drawn using sampling(NUTS). For each
parameter, Eff.Sample
## is a crude measure of effective sample size, and Rhat is the
potential
## scale reduction factor on split chains (at convergence, Rhat = 1).

```

## Cipro

```

## Family: bernoulli
## Links: mu = identity
## Formula: cipro ~ (sens + spec - 1)/(1 + exp(-eta)) + (1 - spec)
##           eta ~ main + reg + rand
##           main ~ total_mg_pcu + ceph_3_4 + fq + novobiocin + me(s_temp,
0.61)
##           rand ~ 0 + (1 | farm)
##           reg ~ 0 + weaned_heifer + adult + dry + footpath
+ f_anything_waste + f_heifers_waste + f_whichclinresp + f_firstmastitis +
f_poultry + f_equine + f_total_cattle + f_yield + f_herd_size + f_bought_
pre + f_scc + f_pneum_vacc + f_diarrvacc + f_anticocc + f_halocur + f_nsai
ddiarr + f_trough_clean + f_time_dam + f_um_spray + f_give_col + f_wean +
f_geographical_area + f_pattern + s_rain + f_percentdryoff + f_calving_gro
up + f_calf_housing_type + f_calf_housing_older + f_hectares + f_othergraz
e + f_bvdvacc + f_ibrvacc + f_leptovacc + f_salmvacc + f_lungvacc + f_clos
tvacc + f_organic + f_daystreatmast + f_timesfirstmast + f_injectmast + f_
nsaidmast + f_treatfoot + f_abcalve + f_nsaidcalve + f_calveclean + f_milk
graze + f_lime + f_predip + f_acf + f_cleancluster + f_drytrough + f_premi
ses + f_shows + f_market + f_hostfarmwalk + f_starling + f_deer + f_badger
+ f_rook + f_pigeon + f_fox + f_pheasant + f_rat + f_shoot + f_hunt + f_o
utsource + f_feedlorry + f_muckspreader + f_aiexternal + f_machinery +
f_bedmilk_1 + f_bedmilk_2 + f_bedmilk_3 + f_bedmilk_4 + f_bedmilk_6 +
f_bedmilk_8 + f_foragetype_1 + f_foragetype_2 + f_foragetype_3 +
f_foragetype_4 + f_foragetype_5 + f_foragetype_6 + f_foragetype_7 +
f_foragetype_8 + f_manure_1 + f_manure_2 + f_manure_3 + f_manure_4 +
f_manure_5 + f_manure_6 + f_manure_7 + f_manure_8 + f_manure_9
+ s_housed_outdoor + f_cefq_dct + f_ceph_dct + f_fram_dct + f_clox_dct + s
_calving_now + f_water + preweaned_heifer
## Data: df (Number of observations: 4145)
## Samples: 4 chains, each with iter = 10000; warmup = 1000; thin = 2;
##           total post-warmup samples = 18000
##
## Group-Level Effects:
## ~farm (Number of levels: 53)
##           Estimate Est.Error l-95% CI u-95% CI Rhat Bulk_ESS
## sd(rand_Intercept)    0.57    0.25    0.06    1.03 1.00    2827
##           Tail_ESS
## sd(rand_Intercept)    4968
##
## Population-Level Effects:
##           Estimate Est.Error l-95% CI
## main_Intercept          -3.05    0.84    -4.68

```

|                                           |       |      |       |
|-------------------------------------------|-------|------|-------|
| ## main_total_mg_pcu                      | 0.10  | 0.16 | -0.21 |
| ## main_ceph_3_4                          | 0.07  | 0.15 | -0.24 |
| ## main_fq                                | 0.36  | 0.18 | -0.00 |
| ## main_novobiocin                        | 0.14  | 0.17 | -0.20 |
| ## reg_weaned_heifer0                     | 0.28  | 0.35 | -0.12 |
| ## reg_weaned_heifer1                     | -0.29 | 0.35 | -1.02 |
| ## reg_adult1                             | 0.03  | 0.12 | -0.15 |
| ## reg_dry1                               | -0.01 | 0.11 | -0.26 |
| ## reg_footpath1                          | 0.02  | 0.10 | -0.16 |
| ## reg_f_anything_waste1                  | 0.03  | 0.13 | -0.17 |
| ## reg_f_heifers_waste1                   | 0.02  | 0.12 | -0.19 |
| ## reg_f_whichclinrespMacrolide           | 0.02  | 0.12 | -0.16 |
| ## reg_f_whichclinrespOtherDdontknow      | -0.05 | 0.34 | -0.77 |
| ## reg_f_whichclinrespPenicillimoxycillin | -0.01 | 0.23 | -0.44 |
| ## reg_f_whichclinrespTetracycline        | 0.03  | 0.14 | -0.17 |
| ## reg_f_firstmastitisCobactan            | 0.02  | 0.19 | -0.29 |
| ## reg_f_firstmastitisMastiplanLC         | -0.01 | 0.22 | -0.44 |
| ## reg_f_firstmastitisOrbeninLA           | -0.02 | 0.23 | -0.56 |
| ## reg_f_firstmastitistdDmultiject        | 0.03  | 0.13 | -0.17 |
| ## reg_f_firstmastitisUbroYellow          | -0.32 | 0.45 | -1.46 |
| ## reg_f_firstmastitisUbrolexin           | -0.02 | 0.17 | -0.42 |
| ## reg_f_poultry1                         | -0.06 | 0.16 | -0.54 |
| ## reg_f_equine1                          | 0.14  | 0.24 | -0.09 |
| ## reg_f_total_cattle                     | -0.01 | 0.08 | -0.20 |
| ## reg_f_yield                            | 0.02  | 0.08 | -0.10 |
| ## reg_f_herd_size                        | 0.01  | 0.08 | -0.15 |
| ## reg_f_bought_pre                       | -0.02 | 0.08 | -0.24 |
| ## reg_f_scc                              | -0.02 | 0.08 | -0.24 |
| ## reg_f_pneum_vacc1                      | 0.08  | 0.19 | -0.11 |
| ## reg_f_diarrvaccY                       | -0.01 | 0.10 | -0.26 |
| ## reg_f_anticocc1                        | -0.01 | 0.11 | -0.28 |
| ## reg_f_halocur1                         | -0.02 | 0.11 | -0.32 |
| ## reg_f_nsaiddiarr1                      | -0.19 | 0.33 | -1.10 |
| ## reg_f_trough_clean.L                   | 0.01  | 0.09 | -0.17 |
| ## reg_f_time_dam.L                       | 0.03  | 0.11 | -0.12 |
| ## reg_f_um_spray1                        | 0.15  | 0.35 | -0.13 |
| ## reg_f_give_col1                        | -0.01 | 0.11 | -0.28 |
| ## reg_f_wean2                            | 0.04  | 0.16 | -0.18 |
| ## reg_f_wean3                            | 0.02  | 0.12 | -0.18 |
| ## reg_f_geographical_area2               | -0.08 | 0.19 | -0.67 |
| ## reg_f_geographical_area3               | 0.05  | 0.16 | -0.13 |
| ## reg_f_pattern2                         | 0.01  | 0.12 | -0.22 |
| ## reg_s_rain                             | 0.13  | 0.10 | -0.01 |
| ## reg_f_percentdryoff                    | -0.02 | 0.07 | -0.20 |
| ## reg_f_calving_group1                   | -0.01 | 0.14 | -0.36 |
| ## reg_f_calf_housing_type2               | 0.04  | 0.15 | -0.17 |
| ## reg_f_calf_housing_type3               | -0.36 | 0.45 | -1.40 |
| ## reg_f_calf_housing_older1              | -0.10 | 0.22 | -0.76 |
| ## reg_f_hectares                         | -0.04 | 0.09 | -0.28 |
| ## reg_f_othersgrazeY                     | 0.03  | 0.12 | -0.16 |
| ## reg_f_bvdvaccY                         | 0.01  | 0.11 | -0.22 |
| ## reg_f_ibrvaccY                         | -0.00 | 0.10 | -0.23 |
| ## reg_f_leptovaccY                       | 0.01  | 0.12 | -0.21 |
| ## reg_f_salmvaccY                        | -0.03 | 0.20 | -0.51 |

|                          |       |      |       |
|--------------------------|-------|------|-------|
| ## reg_f_lungvaccY       | 0.01  | 0.11 | -0.19 |
| ## reg_f_clostvaccY      | -0.02 | 0.13 | -0.34 |
| ## reg_f_organic1        | 0.06  | 0.24 | -0.20 |
| ## reg_f_daystreatmast   | -0.07 | 0.12 | -0.40 |
| ## reg_f_timesfirstmast  | 0.07  | 0.11 | -0.06 |
| ## reg_f_injectmast      | -0.02 | 0.08 | -0.24 |
| ## reg_f_nsaidmast       | -0.03 | 0.08 | -0.27 |
| ## reg_f_treatfoot1      | -0.01 | 0.11 | -0.28 |
| ## reg_f_abcalve1        | 0.01  | 0.13 | -0.25 |
| ## reg_f_nsaidcalve1     | -0.08 | 0.17 | -0.60 |
| ## reg_f_calveclean.L    | 0.02  | 0.10 | -0.15 |
| ## reg_f_milkgraze1      | 0.01  | 0.13 | -0.26 |
| ## reg_f_lime1           | -0.09 | 0.21 | -0.73 |
| ## reg_f_predip1         | 0.03  | 0.13 | -0.16 |
| ## reg_f_acf1            | 0.01  | 0.11 | -0.21 |
| ## reg_f_cleancluster.L  | -0.02 | 0.09 | -0.26 |
| ## reg_f_drytrough.L     | 0.03  | 0.10 | -0.12 |
| ## reg_f_premises2       | -0.02 | 0.11 | -0.32 |
| ## reg_f_shows1          | -0.08 | 0.26 | -0.94 |
| ## reg_f_market1         | -0.04 | 0.13 | -0.42 |
| ## reg_f_hostfarmwalk1   | 0.02  | 0.11 | -0.18 |
| ## reg_f_starling2       | 0.16  | 0.26 | -0.09 |
| ## reg_f_deer2           | 0.05  | 0.16 | -0.14 |
| ## reg_f_badger2         | -0.15 | 0.32 | -1.12 |
| ## reg_f_rook2           | 0.02  | 0.12 | -0.19 |
| ## reg_f_pigeon2         | 0.01  | 0.10 | -0.19 |
| ## reg_f_fox2            | 0.05  | 0.17 | -0.15 |
| ## reg_f_pheasant2       | -0.01 | 0.13 | -0.32 |
| ## reg_f_rat2            | 0.03  | 0.12 | -0.16 |
| ## reg_f_shoot2          | 0.06  | 0.17 | -0.12 |
| ## reg_f_hunt2           | -0.02 | 0.12 | -0.34 |
| ## reg_f_outsource1      | -0.01 | 0.14 | -0.33 |
| ## reg_f_feedlorry1      | -0.01 | 0.11 | -0.28 |
| ## reg_f_muckspreader1   | -0.02 | 0.12 | -0.33 |
| ## reg_f_muckspreader3   | -0.00 | 0.21 | -0.42 |
| ## reg_f_aiexternal1     | -0.00 | 0.10 | -0.23 |
| ## reg_f_machinery1      | 0.03  | 0.13 | -0.14 |
| ## reg_f_bedmilk_1yes    | 0.03  | 0.13 | -0.18 |
| ## reg_f_bedmilk_2yes    | -0.04 | 0.15 | -0.48 |
| ## reg_f_bedmilk_3yes    | -0.04 | 0.14 | -0.43 |
| ## reg_f_bedmilk_4yes    | 0.04  | 0.24 | -0.25 |
| ## reg_f_bedmilk_6yes    | 0.06  | 0.27 | -0.24 |
| ## reg_f_bedmilk_8yes    | 0.01  | 0.22 | -0.37 |
| ## reg_f_foragetype_1yes | 0.02  | 0.18 | -0.26 |
| ## reg_f_foragetype_2yes | 0.01  | 0.14 | -0.23 |
| ## reg_f_foragetype_3yes | -0.05 | 0.17 | -0.54 |
| ## reg_f_foragetype_4yes | 0.04  | 0.13 | -0.13 |
| ## reg_f_foragetype_5yes | 0.00  | 0.12 | -0.24 |
| ## reg_f_foragetype_6yes | -0.12 | 0.28 | -1.00 |
| ## reg_f_foragetype_7yes | 0.04  | 0.15 | -0.16 |
| ## reg_f_foragetype_8yes | 0.17  | 0.52 | -0.19 |
| ## reg_f_manure_1yes     | 0.02  | 0.11 | -0.17 |
| ## reg_f_manure_2yes     | -0.02 | 0.14 | -0.39 |
| ## reg_f_manure_3yes     | -0.02 | 0.12 | -0.35 |

|                                           |       |          |      |          |          |
|-------------------------------------------|-------|----------|------|----------|----------|
| ## reg_f_manure_4yes                      | -0.02 |          | 0.10 | -0.28    |          |
| ## reg_f_manure_5yes                      | -0.24 |          | 0.34 | -1.09    |          |
| ## reg_f_manure_6yes                      | -0.03 |          | 0.13 | -0.42    |          |
| ## reg_f_manure_7yes                      | 0.05  |          | 0.22 | -0.21    |          |
| ## reg_f_manure_8yes                      | -0.02 |          | 0.15 | -0.42    |          |
| ## reg_f_manure_9yes                      | -0.04 |          | 0.24 | -0.70    |          |
| ## reg_s_housed_outdooroutdoor            | -0.03 |          | 0.10 | -0.30    |          |
| ## reg_f_cefq_dct1                        | -0.01 |          | 0.12 | -0.29    |          |
| ## reg_f_ceph_dct1                        | 0.01  |          | 0.11 | -0.21    |          |
| ## reg_f_fram_dct1                        | -0.00 |          | 0.11 | -0.24    |          |
| ## reg_f_clox_dct1                        | 0.04  |          | 0.14 | -0.15    |          |
| ## reg_s_calving_now1                     | 0.02  |          | 0.11 | -0.16    |          |
| ## reg_f_water1                           | 0.00  |          | 0.11 | -0.22    |          |
| ## reg_preweaned_heifer1                  | 1.42  |          | 0.21 | 1.03     |          |
| ## main_mes_temp0.61                      | 0.76  |          | 0.14 | 0.49     |          |
| ##                                        |       | u-95% CI | Rhat | Bulk_ESS | Tail_ESS |
| ## main_Intercept                         | -1.34 | 1.00     |      | 7780     | 11780    |
| ## main_total_mg_pcu                      | 0.41  | 1.00     |      | 10545    | 14938    |
| ## main_ceph_3_4                          | 0.37  | 1.00     |      | 13575    | 15856    |
| ## main_fq                                | 0.72  | 1.00     |      | 10789    | 13074    |
| ## main_novobiocin                        | 0.48  | 1.00     |      | 13003    | 15413    |
| ## reg_weaned_heifer0                     | 1.00  | 1.00     |      | 6841     | 13923    |
| ## reg_weaned_heifer1                     | 0.10  | 1.00     |      | 7041     | 15597    |
| ## reg_adult1                             | 0.40  | 1.00     |      | 14398    | 14700    |
| ## reg_dry1                               | 0.21  | 1.00     |      | 16670    | 16153    |
| ## reg_footpath1                          | 0.28  | 1.00     |      | 15471    | 15464    |
| ## reg_f_anything_waste1                  | 0.39  | 1.00     |      | 15130    | 14501    |
| ## reg_f_heifers_waste1                   | 0.31  | 1.00     |      | 15484    | 15292    |
| ## reg_f_whichclinrespMacrolide           | 0.35  | 1.00     |      | 14875    | 15220    |
| ## reg_f_whichclinrespOtherDdontknow      | 0.31  | 1.00     |      | 14736    | 12843    |
| ## reg_f_whichclinrespPenicillimoxycillin | 0.37  | 1.00     |      | 16589    | 15678    |
| ## reg_f_whichclinrespTetracycline        | 0.41  | 1.00     |      | 14403    | 14946    |
| ## reg_f_firstmastitisCobactan            | 0.48  | 1.00     |      | 14846    | 14608    |
| ## reg_f_firstmastitisMastiplanLC         | 0.37  | 1.00     |      | 15975    | 15876    |
| ## reg_f_firstmastitisOrbeninLA           | 0.32  | 1.00     |      | 14162    | 13345    |
| ## reg_f_firstmastitistdDmultiject        | 0.40  | 1.00     |      | 14814    | 14518    |
| ## reg_f_firstmastitisUbroYellow          | 0.09  | 1.00     |      | 8330     | 12817    |
| ## reg_f_firstmastitisUbrolexin           | 0.24  | 1.00     |      | 15411    | 15461    |
| ## reg_f_poultry1                         | 0.12  | 1.00     |      | 12207    | 12712    |
| ## reg_f_equine1                          | 0.82  | 1.00     |      | 8030     | 13501    |
| ## reg_f_total_cattle                     | 0.15  | 1.00     |      | 14505    | 15269    |
| ## reg_f_yield                            | 0.24  | 1.00     |      | 14423    | 14543    |
| ## reg_f_herd_size                        | 0.20  | 1.00     |      | 15946    | 15840    |
| ## reg_f_bought_pre                       | 0.10  | 1.00     |      | 14828    | 15102    |
| ## reg_f_scc                              | 0.12  | 1.00     |      | 13976    | 14497    |
| ## reg_f_pneum_vacc1                      | 0.65  | 1.00     |      | 12335    | 12273    |
| ## reg_f_diarrvaccY                       | 0.19  | 1.00     |      | 16410    | 16250    |
| ## reg_f_anticocc1                        | 0.21  | 1.00     |      | 15161    | 14804    |
| ## reg_f_halocur1                         | 0.17  | 1.00     |      | 15284    | 15940    |
| ## reg_f_nsaiddiarr1                      | 0.09  | 1.00     |      | 7261     | 10004    |
| ## reg_f_trough_clean.L                   | 0.22  | 1.00     |      | 15464    | 14222    |
| ## reg_f_time_dam.L                       | 0.34  | 1.00     |      | 14025    | 15224    |
| ## reg_f_um_spray1                        | 1.24  | 1.00     |      | 8243     | 9265     |
| ## reg_f_give_coll                        | 0.21  | 1.00     |      | 15970    | 16032    |

|                              |      |      |       |       |
|------------------------------|------|------|-------|-------|
| ## reg_f_wean2               | 0.48 | 1.00 | 14288 | 15157 |
| ## reg_f_wean3               | 0.35 | 1.00 | 14502 | 14967 |
| ## reg_f_geographical_area2  | 0.12 | 1.00 | 12006 | 13732 |
| ## reg_f_geographical_area3  | 0.53 | 1.00 | 12941 | 13302 |
| ## reg_f_pattern2            | 0.28 | 1.00 | 16408 | 15788 |
| ## reg_s_rain                | 0.34 | 1.00 | 10611 | 15141 |
| ## reg_f_percentdryoff       | 0.10 | 1.00 | 14397 | 16269 |
| ## reg_f_calving_group1      | 0.25 | 1.00 | 16023 | 15593 |
| ## reg_f_calf_housing_type2  | 0.49 | 1.00 | 13250 | 13163 |
| ## reg_f_calf_housing_type3  | 0.07 | 1.00 | 4477  | 10283 |
| ## reg_f_calf_housing_older1 | 0.11 | 1.00 | 10820 | 13396 |
| ## reg_f_hectares            | 0.08 | 1.00 | 14566 | 15801 |
| ## reg_f_othergrazeY         | 0.37 | 1.00 | 14111 | 14864 |
| ## reg_f_bvdvaccY            | 0.25 | 1.00 | 15171 | 15781 |
| ## reg_f_ibrvaccY            | 0.20 | 1.00 | 16743 | 15672 |
| ## reg_f_leptovaccY          | 0.31 | 1.00 | 14730 | 14775 |
| ## reg_f_salmvaccY           | 0.27 | 1.00 | 14997 | 14397 |
| ## reg_f_lungvaccY           | 0.28 | 1.00 | 14441 | 16107 |
| ## reg_f_clostvaccY          | 0.21 | 1.00 | 15697 | 15248 |
| ## reg_f_organic1            | 0.83 | 1.00 | 14190 | 13093 |
| ## reg_f_daystreatmast       | 0.07 | 1.00 | 8453  | 12675 |
| ## reg_f_timesfirstmast      | 0.35 | 1.00 | 11534 | 14103 |
| ## reg_f_injectmast          | 0.12 | 1.00 | 15176 | 15591 |
| ## reg_f_nsaidmast           | 0.09 | 1.00 | 14051 | 16320 |
| ## reg_f_treatfoot1          | 0.19 | 1.00 | 15474 | 16554 |
| ## reg_f_abcalve1            | 0.31 | 1.00 | 15204 | 14468 |
| ## reg_f_nsaidcalve1         | 0.11 | 1.00 | 12738 | 13981 |
| ## reg_f_calveclean.L        | 0.30 | 1.00 | 15049 | 13919 |
| ## reg_f_milkgraze1          | 0.32 | 1.00 | 15871 | 15433 |
| ## reg_f_lime1               | 0.13 | 1.00 | 11018 | 11967 |
| ## reg_f_predip1             | 0.39 | 1.00 | 14376 | 14597 |
| ## reg_f_acf1                | 0.27 | 1.00 | 15789 | 15322 |
| ## reg_f_cleancluster.L      | 0.13 | 1.00 | 15390 | 16313 |
| ## reg_f_drytrough.L         | 0.30 | 1.00 | 14370 | 14186 |
| ## reg_f_premises2           | 0.17 | 1.00 | 14403 | 14122 |
| ## reg_f_shows1              | 0.17 | 1.00 | 12089 | 10648 |
| ## reg_f_market1             | 0.14 | 1.00 | 13968 | 14494 |
| ## reg_f_hostfarmwalk1       | 0.31 | 1.00 | 15808 | 15489 |
| ## reg_f_starling2           | 0.90 | 1.00 | 7280  | 11170 |
| ## reg_f_deer2               | 0.53 | 1.00 | 13817 | 14294 |
| ## reg_f_badger2             | 0.13 | 1.00 | 7910  | 9951  |
| ## reg_f_rook2               | 0.35 | 1.00 | 15772 | 15580 |
| ## reg_f_pigeon2             | 0.25 | 1.00 | 15636 | 15837 |
| ## reg_f_fox2                | 0.57 | 1.00 | 10562 | 8466  |
| ## reg_f_pheasant2           | 0.22 | 1.00 | 15681 | 15022 |
| ## reg_f_rat2                | 0.37 | 1.00 | 13793 | 13584 |
| ## reg_f_shoot2              | 0.58 | 1.00 | 11085 | 12573 |
| ## reg_f_hunt2               | 0.19 | 1.00 | 16353 | 15635 |
| ## reg_f_outsource1          | 0.25 | 1.00 | 15479 | 15020 |
| ## reg_f_feedlorry1          | 0.20 | 1.00 | 15056 | 15364 |
| ## reg_f_muckspreader1       | 0.16 | 1.00 | 14734 | 14592 |
| ## reg_f_muckspreader3       | 0.40 | 1.00 | 15333 | 14817 |
| ## reg_f_aiexternal1         | 0.21 | 1.00 | 15511 | 15293 |
| ## reg_f_machinery1          | 0.40 | 1.00 | 15113 | 15582 |

|                                |      |      |       |       |
|--------------------------------|------|------|-------|-------|
| ## reg_f_bedmilk_1yes          | 0.38 | 1.00 | 15561 | 15190 |
| ## reg_f_bedmilk_2yes          | 0.15 | 1.00 | 14426 | 13928 |
| ## reg_f_bedmilk_3yes          | 0.15 | 1.00 | 14656 | 15250 |
| ## reg_f_bedmilk_4yes          | 0.67 | 1.00 | 14770 | 13509 |
| ## reg_f_bedmilk_6yes          | 0.82 | 1.00 | 14339 | 12792 |
| ## reg_f_bedmilk_8yes          | 0.46 | 1.00 | 16273 | 15852 |
| ## reg_f_foragetype_1yes       | 0.47 | 1.00 | 15704 | 14746 |
| ## reg_f_foragetype_2yes       | 0.34 | 1.00 | 15960 | 15240 |
| ## reg_f_foragetype_3yes       | 0.14 | 1.00 | 12964 | 11536 |
| ## reg_f_foragetype_4yes       | 0.44 | 1.00 | 14997 | 14443 |
| ## reg_f_foragetype_5yes       | 0.28 | 1.00 | 15952 | 16036 |
| ## reg_f_foragetype_6yes       | 0.14 | 1.00 | 11125 | 11455 |
| ## reg_f_foragetype_7yes       | 0.50 | 1.00 | 12692 | 13050 |
| ## reg_f_foragetype_8yes       | 1.99 | 1.00 | 9838  | 9013  |
| ## reg_f_manure_1yes           | 0.32 | 1.00 | 15471 | 15932 |
| ## reg_f_manure_2yes           | 0.21 | 1.00 | 14596 | 14179 |
| ## reg_f_manure_3yes           | 0.19 | 1.00 | 14613 | 15276 |
| ## reg_f_manure_4yes           | 0.17 | 1.00 | 14224 | 14259 |
| ## reg_f_manure_5yes           | 0.07 | 1.00 | 5807  | 10435 |
| ## reg_f_manure_6yes           | 0.15 | 1.00 | 12647 | 11564 |
| ## reg_f_manure_7yes           | 0.66 | 1.00 | 15169 | 13528 |
| ## reg_f_manure_8yes           | 0.23 | 1.00 | 15708 | 14392 |
| ## reg_f_manure_9yes           | 0.25 | 1.00 | 14945 | 13664 |
| ## reg_s_housed_outdooroutdoor | 0.13 | 1.00 | 15334 | 14803 |
| ## reg_f_cefq_dct1             | 0.23 | 1.00 | 15340 | 16046 |
| ## reg_f_ceph_dct1             | 0.28 | 1.00 | 14520 | 15492 |
| ## reg_f_fram_dct1             | 0.24 | 1.00 | 15780 | 15529 |
| ## reg_f_clox_dct1             | 0.44 | 1.00 | 14654 | 14524 |
| ## reg_s_calving_now1          | 0.31 | 1.00 | 15797 | 16061 |
| ## reg_f_water1                | 0.25 | 1.00 | 16346 | 15471 |
| ## reg_preweaned_heifer1       | 1.87 | 1.00 | 15840 | 16120 |
| ## main_mes_temp0.61           | 1.06 | 1.00 | 12054 | 15102 |

##  
## Samples were drawn using sampling(NUTS). For each parameter, Eff.Sample  
## is a crude measure of effective sample size, and Rhat is the potential  
## scale reduction factor on split chains (at convergence, Rhat = 1).

## Tet

```
## Family: bernoulli
## Links: mu = identity
## Formula: tetR ~ (sens + spec - 1)/(1 + exp(-eta)) + (1 - spec)
##           eta ~ main + reg + rand
##           main ~ total_mg_pcu + tet + fq + amox + cefalexin + strep +
me(s_temp, 0.61)
##           rand ~ 0 + (1 | farm)
##           reg ~ 0 + weaned_heifer + adult + dry + footpath
+ f_anything_waste + f_heifers_waste + f_whichclinresp + f_firstmastitis +
f_poultry + f_equine + f_total_cattle + f_yield + f_herd_size + f_bought_
pre + f_scc + f_pneum_vacc + f_diarrvacc + f_anticocc + f_halocur + f_nsai
ddiarr + f_trough_clean + f_time_dam + f_um_spray + f_give_col + f_wean +
f_geographical_area + f_pattern + s_rain + f_percentdryoff + f_calving_gro
```



```

up + f_calf_housing_type + f_calf_housing_older + f_hectares + f_othergraze
+ f_bvdvacc + f_ibrvacc + f_leptovacc + f_salmvacc + f_lungvacc + f_clostrvacc
+ f_organic + f_daystreatmast + f_timesfirstmast + f_injectmast + f_nsaidsmast
+ f_treatfoot + f_abcalve + f_nsaidscalve + f_calveclean + f_milkgraze
+ f_lime + f_predip + f_acf + f_cleancluster + f_drytrough + f_premises
+ f_shows + f_market + f_hostfarmwalk + f_starling + f_deer + f_badger
+ f_rook + f_pigeon + f_fox + f_pheasant + f_rat + f_shoot + f_hunt + f_outsource
+ f_feedlorry + f_muckspreader + f_aiexternal + f_machinery + f_bedmilk_1
+ f_bedmilk_2 + f_bedmilk_3 + f_bedmilk_4 + f_bedmilk_6 + f_bedmilk_8
+ f_foragetype_1 + f_foragetype_2 + f_foragetype_3 + f_foragetype_4
+ f_foragetype_5 + f_foragetype_6 + f_foragetype_7 + f_foragetype_8
+ f_manure_1 + f_manure_2 + f_manure_3 + f_manure_4 + f_manure_5
+ f_manure_6 + f_manure_7 + f_manure_8 + f_manure_9
+ s_housed_outdoor + f_cefq_dct + f_ceph_dct + f_fram_dct + f_clox_dct + s_calving_now
+ f_water + preweaned_heifer
## Data: df (Number of observations: 4145)
## Samples: 4 chains, each with iter = 10000; warmup = 1000; thin = 2;
## total post-warmup samples = 18000
##
## Group-Level Effects:
## ~farm (Number of levels: 53)
## Estimate Est.Error l-95% CI u-95% CI Rhat Bulk_ESS Tail_ESS
## sd(rand_Intercept) 0.20 0.15 0.01 0.55 1.00 7391
## sd(rand_Intercept) 11365
##
## Population-Level Effects:
## Estimate Est.Error l-95% CI
## main_Intercept 0.96 0.89 -0.76
## main_total_mg_pcu 0.38 0.19 0.01
## main_tet -0.00 0.15 -0.30
## main_fq -0.00 0.19 -0.40
## main_amox -0.19 0.16 -0.50
## main_cefalexin 0.05 0.17 -0.29
## main_strep -0.27 0.12 -0.51
## reg_weaned_heifer0 -0.23 0.27 -0.81
## reg_weaned_heifer1 0.23 0.28 -0.13
## reg_adult1 0.01 0.11 -0.23
## reg_dry1 -0.30 0.27 -0.86
## reg_footpath1 0.14 0.21 -0.10
## reg_f_anything_waste1 -0.05 0.13 -0.41
## reg_f_heifers_waste1 -0.01 0.12 -0.31
## reg_f_whichclinrespMacrolide 0.02 0.11 -0.19
## reg_f_whichclinrespOtherDdontknow 0.03 0.23 -0.34
## reg_f_whichclinrespPenicillimoxycillin -0.08 0.31 -1.04
## reg_f_whichclinrespTetracycline 0.03 0.13 -0.18
## reg_f_firstmastitisCobactan -0.06 0.24 -0.75
## reg_f_firstmastitisMastiplanLC -0.08 0.30 -0.99
## reg_f_firstmastitisOrbeninLA -0.03 0.24 -0.65
## reg_f_firstmastitistdDmultiject 0.11 0.19 -0.11
## reg_f_firstmastitisUbroYellow 0.04 0.14 -0.18
## reg_f_firstmastitisUbrolexin -0.09 0.23 -0.79
## reg_f_poultry1 0.04 0.13 -0.16
## reg_f_equine1 0.09 0.17 -0.11

```

|                              |       |      |       |
|------------------------------|-------|------|-------|
| ## reg_f_total_cattle        | 0.03  | 0.09 | -0.12 |
| ## reg_f_yield               | 0.16  | 0.17 | -0.05 |
| ## reg_f_herd_size           | 0.03  | 0.09 | -0.12 |
| ## reg_f_bought_pre          | -0.05 | 0.09 | -0.27 |
| ## reg_f_scc                 | -0.02 | 0.06 | -0.17 |
| ## reg_f_pneum_vacc1         | 0.04  | 0.13 | -0.17 |
| ## reg_f_diarrvaccY          | 0.01  | 0.11 | -0.22 |
| ## reg_f_anticocc1           | 0.04  | 0.14 | -0.17 |
| ## reg_f_halocur1            | -0.01 | 0.11 | -0.26 |
| ## reg_f_nsaiddiarr1         | 0.01  | 0.11 | -0.20 |
| ## reg_f_trough_clean.L      | 0.02  | 0.09 | -0.15 |
| ## reg_f_time_dam.L          | 0.04  | 0.13 | -0.17 |
| ## reg_f_um_spray1           | -0.02 | 0.13 | -0.37 |
| ## reg_f_give_col1           | 0.06  | 0.15 | -0.16 |
| ## reg_f_wean2               | -0.03 | 0.15 | -0.43 |
| ## reg_f_wean3               | -0.05 | 0.13 | -0.42 |
| ## reg_f_geographical_area2  | 0.13  | 0.21 | -0.10 |
| ## reg_f_geographical_area3  | -0.00 | 0.12 | -0.28 |
| ## reg_f_pattern2            | -0.06 | 0.16 | -0.53 |
| ## reg_s_rain                | 0.23  | 0.08 | 0.08  |
| ## reg_f_percentdryoff       | 0.07  | 0.09 | -0.05 |
| ## reg_f_calving_group1      | 0.02  | 0.15 | -0.24 |
| ## reg_f_calf_housing_type2  | 0.12  | 0.20 | -0.11 |
| ## reg_f_calf_housing_type3  | -0.18 | 0.25 | -0.84 |
| ## reg_f_calf_housing_older1 | -0.31 | 0.30 | -0.97 |
| ## reg_f_hectares            | 0.06  | 0.09 | -0.07 |
| ## reg_f_othergrazeY         | -0.02 | 0.11 | -0.31 |
| ## reg_f_bvdvaccY            | 0.01  | 0.12 | -0.24 |
| ## reg_f_ibrvaccY            | 0.04  | 0.13 | -0.16 |
| ## reg_f_leptovaccY          | -0.03 | 0.13 | -0.36 |
| ## reg_f_salmvaccY           | 0.08  | 0.27 | -0.25 |
| ## reg_f_lungvaccY           | -0.01 | 0.11 | -0.27 |
| ## reg_f_clostvaccY          | 0.11  | 0.21 | -0.13 |
| ## reg_f_organic1            | -0.02 | 0.19 | -0.49 |
| ## reg_f_daystreatmast       | 0.01  | 0.07 | -0.13 |
| ## reg_f_timesfirstmast      | 0.02  | 0.07 | -0.12 |
| ## reg_f_injectmast          | 0.05  | 0.10 | -0.11 |
| ## reg_f_nsaidmast           | 0.01  | 0.07 | -0.13 |
| ## reg_f_treatfoot1          | 0.07  | 0.15 | -0.12 |
| ## reg_f_abcalve1            | 0.03  | 0.15 | -0.23 |
| ## reg_f_nsaidcalve1         | -0.03 | 0.11 | -0.34 |
| ## reg_f_calveclean.L        | 0.03  | 0.11 | -0.15 |
| ## reg_f_milkgraze1          | 0.00  | 0.14 | -0.29 |
| ## reg_f_lime1               | 0.16  | 0.23 | -0.08 |
| ## reg_f_predip1             | 0.04  | 0.11 | -0.15 |
| ## reg_f_acf1                | -0.01 | 0.11 | -0.28 |
| ## reg_f_cleancluster.L      | -0.04 | 0.10 | -0.30 |
| ## reg_f_drytrough.L         | 0.01  | 0.08 | -0.17 |
| ## reg_f_premises2           | 0.00  | 0.11 | -0.24 |
| ## reg_f_shows1              | 0.10  | 0.23 | -0.17 |
| ## reg_f_market1             | 0.03  | 0.12 | -0.17 |
| ## reg_f_hostfarmwalk1       | 0.03  | 0.12 | -0.17 |
| ## reg_f_starling2           | 0.00  | 0.11 | -0.23 |
| ## reg_f_deer2               | 0.02  | 0.12 | -0.21 |

|                                |          |      |          |          |
|--------------------------------|----------|------|----------|----------|
| ## reg_f_badger2               | 0.04     | 0.16 | -0.22    |          |
| ## reg_f_rook2                 | 0.03     | 0.12 | -0.16    |          |
| ## reg_f_pigeon2               | -0.02    | 0.10 | -0.30    |          |
| ## reg_f_fox2                  | -0.02    | 0.11 | -0.30    |          |
| ## reg_f_pheasant2             | -0.01    | 0.13 | -0.33    |          |
| ## reg_f_rat2                  | 0.01     | 0.11 | -0.20    |          |
| ## reg_f_shoot2                | -0.04    | 0.12 | -0.38    |          |
| ## reg_f_hunt2                 | 0.06     | 0.15 | -0.13    |          |
| ## reg_f_outsource1            | -0.00    | 0.15 | -0.33    |          |
| ## reg_f_feedlorry1            | -0.03    | 0.12 | -0.34    |          |
| ## reg_f_muckspreader1         | 0.04     | 0.13 | -0.18    |          |
| ## reg_f_muckspreader3         | -0.04    | 0.25 | -0.69    |          |
| ## reg_f_aiexternal1           | 0.00     | 0.11 | -0.23    |          |
| ## reg_f_machinery1            | 0.05     | 0.13 | -0.15    |          |
| ## reg_f_bedmilk_1yes          | -0.03    | 0.13 | -0.37    |          |
| ## reg_f_bedmilk_2yes          | 0.09     | 0.18 | -0.12    |          |
| ## reg_f_bedmilk_3yes          | -0.00    | 0.11 | -0.25    |          |
| ## reg_f_bedmilk_4yes          | 0.00     | 0.20 | -0.41    |          |
| ## reg_f_bedmilk_6yes          | -0.03    | 0.21 | -0.55    |          |
| ## reg_f_bedmilk_8yes          | -0.09    | 0.32 | -1.10    |          |
| ## reg_f_foragetype_1yes       | 0.01     | 0.16 | -0.32    |          |
| ## reg_f_foragetype_2yes       | -0.41    | 0.47 | -1.50    |          |
| ## reg_f_foragetype_3yes       | 0.77     | 0.44 | -0.02    |          |
| ## reg_f_foragetype_4yes       | 0.05     | 0.12 | -0.13    |          |
| ## reg_f_foragetype_5yes       | 0.07     | 0.16 | -0.13    |          |
| ## reg_f_foragetype_6yes       | 0.00     | 0.17 | -0.36    |          |
| ## reg_f_foragetype_7yes       | -0.08    | 0.18 | -0.59    |          |
| ## reg_f_foragetype_8yes       | -0.06    | 0.25 | -0.76    |          |
| ## reg_f_manure_1yes           | 0.01     | 0.11 | -0.22    |          |
| ## reg_f_manure_2yes           | -0.02    | 0.14 | -0.37    |          |
| ## reg_f_manure_3yes           | -0.01    | 0.12 | -0.31    |          |
| ## reg_f_manure_4yes           | -0.08    | 0.15 | -0.48    |          |
| ## reg_f_manure_5yes           | -0.03    | 0.13 | -0.37    |          |
| ## reg_f_manure_6yes           | 0.03     | 0.12 | -0.17    |          |
| ## reg_f_manure_7yes           | 0.17     | 0.38 | -0.19    |          |
| ## reg_f_manure_8yes           | 0.03     | 0.17 | -0.23    |          |
| ## reg_f_manure_9yes           | 0.04     | 0.21 | -0.30    |          |
| ## reg_s_housed_outdooroutdoor | -1.44    | 0.22 | -1.91    |          |
| ## reg_f_cefq_dct1             | 0.06     | 0.17 | -0.16    |          |
| ## reg_f_ceph_dct1             | -0.07    | 0.15 | -0.49    |          |
| ## reg_f_fram_dct1             | 0.02     | 0.12 | -0.21    |          |
| ## reg_f_clox_dct1             | -0.02    | 0.12 | -0.34    |          |
| ## reg_s_calving_now1          | 0.70     | 0.27 | 0.10     |          |
| ## reg_f_water1                | 0.06     | 0.16 | -0.14    |          |
| ## reg_preweaned_heifer1       | 1.22     | 0.27 | 0.69     |          |
| ## main_mes_temp0.61           | 0.68     | 0.13 | 0.44     |          |
| ##                             | u-95% CI | Rhat | Bulk_ESS | Tail_ESS |
| ## main_Intercept              | 2.78     | 1.00 | 8747     | 11650    |
| ## main_total_mg_pcu           | 0.75     | 1.00 | 10614    | 13883    |
| ## main_tet                    | 0.29     | 1.00 | 12258    | 14608    |
| ## main_fq                     | 0.35     | 1.00 | 7406     | 11706    |
| ## main_amox                   | 0.14     | 1.00 | 10185    | 13592    |
| ## main_cefalexin              | 0.38     | 1.00 | 9216     | 12232    |
| ## main_strep                  | -0.03    | 1.00 | 10500    | 13827    |

|                                           |      |      |       |       |
|-------------------------------------------|------|------|-------|-------|
| ## reg_weaned_heifer0                     | 0.14 | 1.00 | 9264  | 15443 |
| ## reg_weaned_heifer1                     | 0.82 | 1.00 | 9271  | 15628 |
| ## reg_adult1                             | 0.27 | 1.00 | 14327 | 15005 |
| ## reg_dry1                               | 0.05 | 1.00 | 11391 | 14558 |
| ## reg_footpath1                          | 0.70 | 1.00 | 12742 | 15718 |
| ## reg_f_anything_waste1                  | 0.15 | 1.00 | 14253 | 14524 |
| ## reg_f_heifers_waste1                   | 0.22 | 1.00 | 15405 | 15104 |
| ## reg_f_whichclinrespMacrolide           | 0.30 | 1.00 | 15695 | 17025 |
| ## reg_f_whichclinrespOtherDdontknow      | 0.60 | 1.00 | 15608 | 14888 |
| ## reg_f_whichclinrespPenicillimoxycillin | 0.27 | 1.00 | 13993 | 13316 |
| ## reg_f_whichclinrespTetracycline        | 0.40 | 1.00 | 14733 | 15606 |
| ## reg_f_firstmastitisCobactan            | 0.26 | 1.00 | 15161 | 14416 |
| ## reg_f_firstmastitisMastiplanLC         | 0.29 | 1.00 | 13831 | 12661 |
| ## reg_f_firstmastitisOrbeninLA           | 0.36 | 1.00 | 16610 | 15880 |
| ## reg_f_firstmastitistdDmultiject        | 0.62 | 1.00 | 12480 | 13953 |
| ## reg_f_firstmastitisUbroYellow          | 0.41 | 1.00 | 15274 | 15986 |
| ## reg_f_firstmastitisUbrolexin           | 0.18 | 1.00 | 12693 | 12724 |
| ## reg_f_poultry1                         | 0.41 | 1.00 | 14158 | 13340 |
| ## reg_f_equine1                          | 0.55 | 1.00 | 11860 | 15258 |
| ## reg_f_total_cattle                     | 0.25 | 1.00 | 15110 | 15655 |
| ## reg_f_yield                            | 0.56 | 1.00 | 6661  | 10123 |
| ## reg_f_herd_size                        | 0.26 | 1.00 | 15711 | 16010 |
| ## reg_f_bought_pre                       | 0.08 | 1.00 | 13787 | 15887 |
| ## reg_f_scc                              | 0.10 | 1.00 | 15289 | 17441 |
| ## reg_f_pneum_vacc1                      | 0.37 | 1.00 | 14927 | 16183 |
| ## reg_f_diarrvaccY                       | 0.25 | 1.00 | 15641 | 16065 |
| ## reg_f_anticocc1                        | 0.41 | 1.00 | 14815 | 15452 |
| ## reg_f_halocur1                         | 0.21 | 1.00 | 15180 | 16129 |
| ## reg_f_nsaidiarr1                       | 0.29 | 1.00 | 15659 | 16107 |
| ## reg_f_trough_clean.L                   | 0.23 | 1.00 | 15033 | 15863 |
| ## reg_f_time_dam.L                       | 0.38 | 1.00 | 11822 | 13812 |
| ## reg_f_um_spray1                        | 0.23 | 1.00 | 14539 | 14287 |
| ## reg_f_give_coll                        | 0.48 | 1.00 | 14122 | 14537 |
| ## reg_f_wean2                            | 0.21 | 1.00 | 14321 | 13988 |
| ## reg_f_wean3                            | 0.14 | 1.00 | 13670 | 15030 |
| ## reg_f_geographical_area2               | 0.72 | 1.00 | 10919 | 14109 |
| ## reg_f_geographical_area3               | 0.26 | 1.00 | 14951 | 15568 |
| ## reg_f_pattern2                         | 0.17 | 1.00 | 14114 | 14808 |
| ## reg_s_rain                             | 0.38 | 1.00 | 15814 | 15950 |
| ## reg_f_percentdryoff                    | 0.29 | 1.00 | 12694 | 16619 |
| ## reg_f_calving_group1                   | 0.42 | 1.00 | 15668 | 15472 |
| ## reg_f_calf_housing_type2               | 0.66 | 1.00 | 11278 | 14161 |
| ## reg_f_calf_housing_type3               | 0.09 | 1.00 | 9940  | 14570 |
| ## reg_f_calf_housing_older1              | 0.06 | 1.00 | 8885  | 14454 |
| ## reg_f_hectares                         | 0.29 | 1.00 | 13292 | 15903 |
| ## reg_f_othergrazeY                      | 0.19 | 1.00 | 14860 | 14864 |
| ## reg_f_bvdvaccY                         | 0.29 | 1.00 | 14430 | 14865 |
| ## reg_f_ibrvaccY                         | 0.40 | 1.00 | 14453 | 14679 |
| ## reg_f_leptovaccY                       | 0.20 | 1.00 | 14392 | 15565 |
| ## reg_f_salmvaccY                        | 0.90 | 1.00 | 13343 | 13404 |
| ## reg_f_lungvaccY                        | 0.21 | 1.00 | 14784 | 16192 |
| ## reg_f_clostvaccY                       | 0.72 | 1.00 | 12841 | 14134 |
| ## reg_f_organic1                         | 0.32 | 1.00 | 15254 | 14692 |
| ## reg_f_daystreatmast                    | 0.19 | 1.00 | 15927 | 17130 |

|                          |      |      |       |       |
|--------------------------|------|------|-------|-------|
| ## reg_f_timesfirstmast  | 0.20 | 1.00 | 13185 | 14381 |
| ## reg_f_injectmast      | 0.32 | 1.00 | 14245 | 15401 |
| ## reg_f_nsaidmast       | 0.18 | 1.00 | 15115 | 16324 |
| ## reg_f_treatfoot1      | 0.50 | 1.00 | 12994 | 14817 |
| ## reg_f_abcalve1        | 0.43 | 1.00 | 15274 | 15289 |
| ## reg_f_nsaidcalve1     | 0.15 | 1.00 | 14736 | 15886 |
| ## reg_f_calveclean.L    | 0.31 | 1.00 | 14507 | 14816 |
| ## reg_f_milkgraze1      | 0.32 | 1.00 | 15278 | 14803 |
| ## reg_f_lime1           | 0.76 | 1.00 | 10083 | 13374 |
| ## reg_f_predip1         | 0.35 | 1.00 | 13977 | 16083 |
| ## reg_f_acf1            | 0.20 | 1.00 | 15943 | 15221 |
| ## reg_f_cleancluster.L  | 0.11 | 1.00 | 14236 | 16687 |
| ## reg_f_drytrough.L     | 0.20 | 1.00 | 16096 | 16774 |
| ## reg_f_premises2       | 0.26 | 1.00 | 15374 | 15881 |
| ## reg_f_shows1          | 0.80 | 1.00 | 12737 | 15056 |
| ## reg_f_market1         | 0.36 | 1.00 | 15045 | 15477 |
| ## reg_f_hostfarmwalk1   | 0.37 | 1.00 | 14950 | 15283 |
| ## reg_f_starling2       | 0.26 | 1.00 | 15973 | 16685 |
| ## reg_f_deer2           | 0.31 | 1.00 | 15328 | 16451 |
| ## reg_f_badger2         | 0.46 | 1.00 | 14121 | 14492 |
| ## reg_f_rook2           | 0.37 | 1.00 | 15999 | 16285 |
| ## reg_f_pigeon2         | 0.16 | 1.00 | 15925 | 16057 |
| ## reg_f_fox2            | 0.19 | 1.00 | 15540 | 16240 |
| ## reg_f_pheasant2       | 0.25 | 1.00 | 15030 | 15909 |
| ## reg_f_rat2            | 0.26 | 1.00 | 15951 | 16409 |
| ## reg_f_shoot2          | 0.16 | 1.00 | 14432 | 15899 |
| ## reg_f_hunt2           | 0.48 | 1.00 | 14078 | 15249 |
| ## reg_f_outsource1      | 0.33 | 1.00 | 15348 | 15865 |
| ## reg_f_feedlorry1      | 0.17 | 1.00 | 14618 | 15909 |
| ## reg_f_muckspreader1   | 0.40 | 1.00 | 13910 | 16215 |
| ## reg_f_muckspreader3   | 0.33 | 1.00 | 14898 | 15744 |
| ## reg_f_aiexternal1     | 0.25 | 1.00 | 14070 | 14577 |
| ## reg_f_machinery1      | 0.41 | 1.00 | 14689 | 14770 |
| ## reg_f_bedmilk_1yes    | 0.20 | 1.00 | 14768 | 15479 |
| ## reg_f_bedmilk_2yes    | 0.60 | 1.00 | 13080 | 14046 |
| ## reg_f_bedmilk_3yes    | 0.24 | 1.00 | 15735 | 16463 |
| ## reg_f_bedmilk_4yes    | 0.44 | 1.00 | 15502 | 15669 |
| ## reg_f_bedmilk_6yes    | 0.33 | 1.00 | 13869 | 14896 |
| ## reg_f_bedmilk_8yes    | 0.25 | 1.00 | 14348 | 13233 |
| ## reg_f_foragetype_1yes | 0.36 | 1.00 | 15227 | 15558 |
| ## reg_f_foragetype_2yes | 0.08 | 1.00 | 7281  | 12210 |
| ## reg_f_foragetype_3yes | 1.51 | 1.00 | 5981  | 6738  |
| ## reg_f_foragetype_4yes | 0.37 | 1.00 | 14646 | 15879 |
| ## reg_f_foragetype_5yes | 0.51 | 1.00 | 14249 | 16154 |
| ## reg_f_foragetype_6yes | 0.38 | 1.00 | 15372 | 15831 |
| ## reg_f_foragetype_7yes | 0.13 | 1.00 | 13815 | 15252 |
| ## reg_f_foragetype_8yes | 0.28 | 1.00 | 14946 | 15285 |
| ## reg_f_manure_1yes     | 0.28 | 1.00 | 14784 | 15325 |
| ## reg_f_manure_2yes     | 0.23 | 1.00 | 15789 | 15647 |
| ## reg_f_manure_3yes     | 0.22 | 1.00 | 15749 | 15214 |
| ## reg_f_manure_4yes     | 0.11 | 1.00 | 12735 | 14662 |
| ## reg_f_manure_5yes     | 0.18 | 1.00 | 14830 | 16246 |
| ## reg_f_manure_6yes     | 0.36 | 1.00 | 14070 | 13354 |
| ## reg_f_manure_7yes     | 1.35 | 1.00 | 11104 | 12883 |

```

## reg_f_manure_8yes          0.47 1.00    15453    14552
## reg_f_manure_9yes          0.59 1.00    15096    14725
## reg_s_housed_outdoor        -1.06 1.00    14835    16854
## reg_f_cefq_dct1            0.54 1.00    13995    15171
## reg_f_ceph_dct1            0.13 1.00    12552    12593
## reg_f_fram_dct1            0.33 1.00    15485    15537
## reg_f_clox_dct1            0.21 1.00    15132    15575
## reg_s_calving_now1         1.19 1.00    11732    10019
## reg_f_water1                0.51 1.00    12814    14114
## reg_preweaned_heifer1      1.76 1.00    16375    17001
## main_mes_temp0.61          0.93 1.00    11845    14453
##
## Samples were drawn using sampling(NUTS). For each
parameter, Eff.Sample
## is a crude measure of effective sample size, and Rhat is the
potential
## scale reduction factor on split chains (at convergence, Rhat = 1).

```

## Strep

```

## Family: bernoulli
## Links: mu = identity
## Formula: strepR ~ (sens + spec - 1)/(1 + exp(-eta)) + (1 - spec)
##          eta ~ main + reg + rand
##          main ~ total_mg_pcu + tet + fq + amox + cefalexin + strep +
me(s_temp, 0.61)
##          rand ~ 0 + (1 | farm)
##          reg ~ 0 + weaned_heifer + adult + dry + footpath
+ f_anything_waste + f_heifers_waste + f_whichclinresp + f_firstmastitis +
f_poultry + f_equine + f_total_cattle + f_yield + f_herd_size + f_bought_
pre + f_scc + f_pneum_vacc + f_diarrvacc + f_anticocc + f_halocur + f_nsai
ddiarr + f_trough_clean + f_time_dam + f_um_spray + f_give_col + f_wean +
f_geographical_area + f_pattern + s_rain + f_percentdryoff + f_calving_gro
up + f_calf_housing_type + f_calf_housing_older + f_hectares + f_othergraz
e + f_bvdvacc + f_ibrvacc + f_leptovacc + f_salmvacc + f_lungvacc + f_clos
tvacc + f_organic + f_daystreatmast + f_timesfirstmast + f_injectmast + f_
nsaidmast + f_treatfoot + f_abcalve + f_nsaidcalve + f_calveclean + f_milk
graze + f_lime + f_predip + f_acf + f_cleancluster + f_drytrough + f_premi
ses + f_shows + f_market + f_hostfarmwalk + f_starling + f_deer + f_badger
+ f_rook + f_pigeon + f_fox + f_pheasant + f_rat + f_shoot + f_hunt + f_o
utsource + f_feedlorry + f_muckspreader + f_aiexternal + f_machinery +
f_bedmilk_1 + f_bedmilk_2 + f_bedmilk_3 + f_bedmilk_4 + f_bedmilk_6 +
f_bedmilk_8 + f_foragetype_1 + f_foragetype_2 + f_foragetype_3 +
f_foragetype_4 + f_foragetype_5 + f_foragetype_6 + f_foragetype_7 +
f_foragetype_8 + f_manure_1 + f_manure_2 + f_manure_3 + f_manure_4 +
f_manure_5 + f_manure_6 + f_manure_7 + f_manure_8 + f_manure_9
+ s_housed_outdoor + f_cefq_dct + f_ceph_dct + f_fram_dct + f_clox_dct + s
_calving_now + f_water + preweaned_heifer
## Data: df (Number of observations: 4145)
## Samples: 4 chains, each with iter = 10000; warmup = 1000; thin = 2;
##          total post-warmup samples = 18000
##
## Group-Level Effects:
## ~farm (Number of levels: 53)

```

```

##          Estimate Est.Error l-95% CI u-95% CI Rhat Bulk_ESS
## sd(rand_Intercept)    0.36    0.11    0.10    0.57 1.00    4062
##          Tail_ESS
## sd(rand_Intercept)    4444
##
## Population-Level Effects:
##
##          Estimate Est.Error l-95% CI
## main_Intercept      -0.81    0.52   -1.97
## main_total_mg_pcu    0.12    0.14   -0.15
## main_tet             0.09    0.10   -0.11
## main_fq              0.00    0.11   -0.21
## main_amox            0.03    0.11   -0.17
## main_cefalexin      -0.10    0.09   -0.28
## main_strep           0.01    0.10   -0.18
## reg_weaned_heifer0  -0.01    0.06   -0.16
## reg_weaned_heifer1  0.01    0.06   -0.10
## reg_adult1          -0.05    0.09   -0.31
## reg_dry1            0.14    0.18   -0.03
## reg_footpath1      -0.57    0.34   -1.11
## reg_f_anything_waste1 -0.00    0.06   -0.15
## reg_f_heifers_waste1 0.03    0.09   -0.08
## reg_f_whichclinrespMacrolide -0.02    0.07   -0.20
## reg_f_whichclinrespOtherDdontknow -0.01    0.13   -0.27
## reg_f_whichclinrespPenicillimoxycillin -0.05    0.23   -0.75
## reg_f_whichclinrespTetracycline -0.03    0.10   -0.33
## reg_f_firstmastitisCobactan -0.01    0.11   -0.25
## reg_f_firstmastitisMastiplanLC -0.05    0.22   -0.73
## reg_f_firstmastitisOrbeninLA 0.01    0.13   -0.22
## reg_f_firstmastitistdDmultiject 0.04    0.11   -0.07
## reg_f_firstmastitisUbroYellow 0.00    0.07   -0.14
## reg_f_firstmastitisUbrolexin -0.10    0.23   -0.81
## reg_f_poultry1      0.01    0.07   -0.12
## reg_f_equine1       -0.02    0.07   -0.21
## reg_f_total_cattle  0.04    0.07   -0.05
## reg_f_yield          0.01    0.05   -0.08
## reg_f_herd_size      0.02    0.06   -0.06
## reg_f_bought_pre     0.01    0.04   -0.07
## reg_f_scc           -0.02    0.05   -0.16
## reg_f_pneum_vacc1   0.13    0.20   -0.05
## reg_f_diarrvaccY    0.01    0.06   -0.11
## reg_f_anticoccc1    0.01    0.07   -0.12
## reg_f_halocur1     -0.06    0.12   -0.41
## reg_f_nsaidiarr1    0.01    0.06   -0.11
## reg_f_trough_clean.L 0.02    0.06   -0.07
## reg_f_time_dam.L    0.03    0.08   -0.07
## reg_f_um_spray1     0.01    0.08   -0.12
## reg_f_give_coll     0.01    0.07   -0.11
## reg_f_wean2        -0.10    0.19   -0.65
## reg_f_wean3        -0.01    0.06   -0.17
## reg_f_geographical_area2 -0.03    0.09   -0.31
## reg_f_geographical_area3 0.01    0.07   -0.10
## reg_f_pattern2     -0.01    0.08   -0.21
## reg_s_rain          0.01    0.03   -0.04
## reg_f_percentdryoff 0.01    0.04   -0.06

```

|                              |       |      |       |
|------------------------------|-------|------|-------|
| ## reg_f_calving_group1      | 0.02  | 0.09 | -0.12 |
| ## reg_f_calf_housing_type2  | -0.02 | 0.07 | -0.24 |
| ## reg_f_calf_housing_type3  | -0.00 | 0.06 | -0.15 |
| ## reg_f_calf_housing_older1 | 0.00  | 0.06 | -0.13 |
| ## reg_f_hectares            | 0.00  | 0.04 | -0.07 |
| ## reg_f_othergrazeY         | -0.02 | 0.08 | -0.24 |
| ## reg_f_bvdvaccY            | 0.03  | 0.09 | -0.07 |
| ## reg_f_ibrvaccY            | 0.01  | 0.06 | -0.10 |
| ## reg_f_leptovaccY          | 0.03  | 0.09 | -0.09 |
| ## reg_f_salmvaccY           | 0.01  | 0.11 | -0.16 |
| ## reg_f_lungvaccY           | 0.01  | 0.06 | -0.10 |
| ## reg_f_clostvaccY          | 0.02  | 0.08 | -0.10 |
| ## reg_f_organic1            | -0.04 | 0.16 | -0.54 |
| ## reg_f_daystreatmast       | 0.01  | 0.05 | -0.06 |
| ## reg_f_timesfirstmast      | -0.00 | 0.04 | -0.09 |
| ## reg_f_injectmast          | -0.01 | 0.05 | -0.14 |
| ## reg_f_nsaidmast           | -0.05 | 0.08 | -0.26 |
| ## reg_f_treatfoot1          | 0.01  | 0.06 | -0.11 |
| ## reg_f_abcalve1            | -0.12 | 0.22 | -0.74 |
| ## reg_f_nsaidcalve1         | 0.01  | 0.06 | -0.11 |
| ## reg_f_calveclean.L        | 0.02  | 0.07 | -0.07 |
| ## reg_f_milkgraze1          | 0.04  | 0.12 | -0.09 |
| ## reg_f_lime1               | 0.00  | 0.06 | -0.12 |
| ## reg_f_predip1             | 0.01  | 0.06 | -0.09 |
| ## reg_f_acf1                | -0.02 | 0.09 | -0.28 |
| ## reg_f_cleancluster.L      | -0.08 | 0.11 | -0.37 |
| ## reg_f_drytrough.L         | -0.01 | 0.05 | -0.14 |
| ## reg_f_premises2           | -0.01 | 0.07 | -0.18 |
| ## reg_f_shows1              | 0.06  | 0.16 | -0.09 |
| ## reg_f_market1             | 0.00  | 0.06 | -0.14 |
| ## reg_f_hostfarmwalk1       | 0.00  | 0.06 | -0.13 |
| ## reg_f_starling2           | 0.02  | 0.07 | -0.09 |
| ## reg_f_deer2               | 0.01  | 0.07 | -0.11 |
| ## reg_f_badger2             | -0.01 | 0.08 | -0.21 |
| ## reg_f_rook2               | 0.03  | 0.09 | -0.08 |
| ## reg_f_pigeon2             | 0.01  | 0.06 | -0.10 |
| ## reg_f_fox2                | -0.00 | 0.06 | -0.13 |
| ## reg_f_pheasant2           | 0.06  | 0.15 | -0.08 |
| ## reg_f_rat2                | 0.01  | 0.06 | -0.11 |
| ## reg_f_shoot2              | 0.01  | 0.07 | -0.13 |
| ## reg_f_hunt2               | 0.00  | 0.06 | -0.12 |
| ## reg_f_outsource1          | -0.00 | 0.08 | -0.18 |
| ## reg_f_feedlorry1          | -0.01 | 0.07 | -0.19 |
| ## reg_f_muckspreader1       | 0.01  | 0.06 | -0.12 |
| ## reg_f_muckspreader3       | -0.03 | 0.15 | -0.43 |
| ## reg_f_aiexternal1         | 0.02  | 0.08 | -0.08 |
| ## reg_f_machinery1          | 0.01  | 0.07 | -0.10 |
| ## reg_f_bedmilk_1yes        | -0.01 | 0.07 | -0.19 |
| ## reg_f_bedmilk_2yes        | 0.01  | 0.07 | -0.12 |
| ## reg_f_bedmilk_3yes        | -0.00 | 0.06 | -0.14 |
| ## reg_f_bedmilk_4yes        | 0.07  | 0.25 | -0.12 |
| ## reg_f_bedmilk_6yes        | -0.00 | 0.12 | -0.23 |
| ## reg_f_bedmilk_8yes        | -0.01 | 0.14 | -0.30 |
| ## reg_f_foragetype_1yes     | 0.02  | 0.11 | -0.13 |



|                                           |          |      |          |          |
|-------------------------------------------|----------|------|----------|----------|
| ## reg_f_foragetype_2yes                  | -0.04    | 0.12 | -0.40    |          |
| ## reg_f_foragetype_3yes                  | 0.13     | 0.22 | -0.05    |          |
| ## reg_f_foragetype_4yes                  | -0.01    | 0.06 | -0.19    |          |
| ## reg_f_foragetype_5yes                  | 0.07     | 0.14 | -0.06    |          |
| ## reg_f_foragetype_6yes                  | 0.03     | 0.11 | -0.12    |          |
| ## reg_f_foragetype_7yes                  | 0.01     | 0.07 | -0.12    |          |
| ## reg_f_foragetype_8yes                  | -0.03    | 0.18 | -0.51    |          |
| ## reg_f_manure_1yes                      | -0.01    | 0.07 | -0.20    |          |
| ## reg_f_manure_2yes                      | 0.01     | 0.07 | -0.13    |          |
| ## reg_f_manure_3yes                      | 0.04     | 0.11 | -0.08    |          |
| ## reg_f_manure_4yes                      | 0.01     | 0.06 | -0.09    |          |
| ## reg_f_manure_5yes                      | -0.00    | 0.06 | -0.15    |          |
| ## reg_f_manure_6yes                      | 0.01     | 0.07 | -0.10    |          |
| ## reg_f_manure_7yes                      | 0.00     | 0.10 | -0.18    |          |
| ## reg_f_manure_8yes                      | 0.01     | 0.08 | -0.15    |          |
| ## reg_f_manure_9yes                      | 0.01     | 0.10 | -0.18    |          |
| ## reg_s_housed_outdooroutdoor            | -0.28    | 0.27 | -0.83    |          |
| ## reg_f_cefq_dct1                        | -0.03    | 0.10 | -0.33    |          |
| ## reg_f_ceph_dct1                        | 0.04     | 0.10 | -0.07    |          |
| ## reg_f_fram_dct1                        | -0.02    | 0.08 | -0.27    |          |
| ## reg_f_clox_dct1                        | -0.00    | 0.07 | -0.16    |          |
| ## reg_s_calving_now1                     | 0.24     | 0.22 | -0.02    |          |
| ## reg_f_water1                           | -0.00    | 0.07 | -0.16    |          |
| ## reg_preweaned_heifer1                  | 0.67     | 0.14 | 0.38     |          |
| ## main_mes_temp0.61                      | 0.42     | 0.07 | 0.28     |          |
| ##                                        | u-95% CI | Rhat | Bulk_ESS | Tail_ESS |
| ## main_Intercept                         | 0.06     | 1.00 | 7321     | 10751    |
| ## main_total_mg_pcu                      | 0.40     | 1.00 | 12573    | 14821    |
| ## main_tet                               | 0.30     | 1.00 | 12164    | 15701    |
| ## main_fq                                | 0.22     | 1.00 | 12469    | 14767    |
| ## main_amox                              | 0.25     | 1.00 | 12813    | 15318    |
| ## main_cefalexin                         | 0.09     | 1.00 | 12798    | 14383    |
| ## main_strep                             | 0.20     | 1.00 | 12870    | 15466    |
| ## reg_weaned_heifer0                     | 0.10     | 1.00 | 14253    | 15333    |
| ## reg_weaned_heifer1                     | 0.16     | 1.00 | 13769    | 15464    |
| ## reg_adult1                             | 0.04     | 1.00 | 13998    | 15646    |
| ## reg_dry1                               | 0.58     | 1.00 | 12528    | 16309    |
| ## reg_footpath1                          | 0.01     | 1.00 | 8582     | 9831     |
| ## reg_f_anything_waste1                  | 0.12     | 1.00 | 15377    | 15590    |
| ## reg_f_heifers_waste1                   | 0.31     | 1.00 | 12356    | 12552    |
| ## reg_f_whichclinrespMacrolide           | 0.09     | 1.00 | 13899    | 15873    |
| ## reg_f_whichclinrespOtherDdontknow      | 0.20     | 1.00 | 14639    | 15592    |
| ## reg_f_whichclinrespPenicillimoxycillin | 0.15     | 1.00 | 13090    | 13395    |
| ## reg_f_whichclinrespTetracycline        | 0.08     | 1.00 | 14297    | 14621    |
| ## reg_f_firstmastitisCobactan            | 0.18     | 1.00 | 14228    | 15707    |
| ## reg_f_firstmastitisMastiplanLC         | 0.14     | 1.00 | 13845    | 13010    |
| ## reg_f_firstmastitisOrbeninLA           | 0.26     | 1.00 | 14861    | 15672    |
| ## reg_f_firstmastitistdDmultiject        | 0.36     | 1.00 | 13839    | 14471    |
| ## reg_f_firstmastitisUbroYellow          | 0.16     | 1.00 | 13766    | 15633    |
| ## reg_f_firstmastitisUbrolexin           | 0.09     | 1.00 | 11638    | 12641    |
| ## reg_f_poultry1                         | 0.16     | 1.00 | 13547    | 15466    |
| ## reg_f_equine1                          | 0.09     | 1.00 | 13516    | 14792    |
| ## reg_f_total_cattle                     | 0.23     | 1.00 | 13370    | 15177    |
| ## reg_f_yield                            | 0.13     | 1.00 | 14825    | 15382    |

|                              |      |      |       |       |
|------------------------------|------|------|-------|-------|
| ## reg_f_herd_size           | 0.18 | 1.00 | 15194 | 16039 |
| ## reg_f_bought_pre          | 0.12 | 1.00 | 15979 | 16427 |
| ## reg_f_scc                 | 0.05 | 1.00 | 15057 | 16080 |
| ## reg_f_pneum_vacc1         | 0.65 | 1.00 | 7413  | 12394 |
| ## reg_f_diarrvaccY          | 0.17 | 1.00 | 14523 | 16212 |
| ## reg_f_anticocc1           | 0.18 | 1.00 | 14644 | 15233 |
| ## reg_f_halocur1            | 0.06 | 1.00 | 11606 | 13084 |
| ## reg_f_nsaiddiarr1         | 0.17 | 1.00 | 15150 | 16283 |
| ## reg_f_trough_clean.L      | 0.18 | 1.00 | 14300 | 15696 |
| ## reg_f_time_dam.L          | 0.29 | 1.00 | 10431 | 10373 |
| ## reg_f_um_spray1           | 0.21 | 1.00 | 14988 | 15623 |
| ## reg_f_give_coll           | 0.17 | 1.00 | 14462 | 15068 |
| ## reg_f_wean2               | 0.06 | 1.00 | 11334 | 13836 |
| ## reg_f_wean3               | 0.11 | 1.00 | 14838 | 15563 |
| ## reg_f_geographical_area2  | 0.07 | 1.00 | 14255 | 14913 |
| ## reg_f_geographical_area3  | 0.19 | 1.00 | 14948 | 15018 |
| ## reg_f_pattern2            | 0.12 | 1.00 | 14065 | 12754 |
| ## reg_s_rain                | 0.08 | 1.00 | 15615 | 16450 |
| ## reg_f_percentdryoff       | 0.13 | 1.00 | 14862 | 16756 |
| ## reg_f_calving_group1      | 0.25 | 1.00 | 15404 | 15050 |
| ## reg_f_calf_housing_type2  | 0.08 | 1.00 | 14807 | 16063 |
| ## reg_f_calf_housing_type3  | 0.13 | 1.00 | 15690 | 16652 |
| ## reg_f_calf_housing_older1 | 0.14 | 1.00 | 14825 | 15535 |
| ## reg_f_hectares            | 0.10 | 1.00 | 14370 | 15877 |
| ## reg_f_othergrazeY         | 0.09 | 1.00 | 14462 | 15400 |
| ## reg_f_bvdvaccY            | 0.30 | 1.00 | 13807 | 14099 |
| ## reg_f_ibrvaccY            | 0.17 | 1.00 | 14892 | 16020 |
| ## reg_f_leptovaccY          | 0.32 | 1.00 | 12056 | 12766 |
| ## reg_f_salmvaccY           | 0.27 | 1.00 | 14364 | 14766 |
| ## reg_f_lungvaccY           | 0.18 | 1.00 | 13585 | 14958 |
| ## reg_f_clostvaccY          | 0.24 | 1.00 | 15218 | 14779 |
| ## reg_f_organic1            | 0.12 | 1.00 | 13284 | 12889 |
| ## reg_f_daystreatmast       | 0.14 | 1.00 | 14479 | 16013 |
| ## reg_f_timesfirstmast      | 0.08 | 1.00 | 15304 | 16253 |
| ## reg_f_injectmast          | 0.09 | 1.00 | 14611 | 15908 |
| ## reg_f_nsaidmast           | 0.03 | 1.00 | 13198 | 15185 |
| ## reg_f_treatfoot1          | 0.16 | 1.00 | 13671 | 14945 |
| ## reg_f_abcalve1            | 0.07 | 1.00 | 10842 | 14542 |
| ## reg_f_nsaidcalve1         | 0.16 | 1.00 | 14347 | 15788 |
| ## reg_f_calveclean.L        | 0.24 | 1.00 | 14793 | 15151 |
| ## reg_f_milkgraze1          | 0.41 | 1.00 | 12489 | 12254 |
| ## reg_f_lime1               | 0.14 | 1.00 | 15758 | 16445 |
| ## reg_f_predip1             | 0.17 | 1.00 | 15007 | 15367 |
| ## reg_f_acf1                | 0.09 | 1.00 | 14487 | 14926 |
| ## reg_f_cleancluster.L      | 0.04 | 1.00 | 11413 | 15158 |
| ## reg_f_drytrough.L         | 0.09 | 1.00 | 14546 | 15107 |
| ## reg_f_premises2           | 0.11 | 1.00 | 14295 | 15208 |
| ## reg_f_shows1              | 0.58 | 1.00 | 14011 | 13381 |
| ## reg_f_market1             | 0.14 | 1.00 | 15691 | 16332 |
| ## reg_f_hostfarmwalk1       | 0.16 | 1.00 | 14381 | 16334 |
| ## reg_f_starling2           | 0.21 | 1.00 | 14770 | 14988 |
| ## reg_f_deer2               | 0.20 | 1.00 | 14417 | 15780 |
| ## reg_f_badger2             | 0.13 | 1.00 | 13919 | 15385 |
| ## reg_f_rook2               | 0.28 | 1.00 | 13904 | 15973 |

|                                |      |      |       |       |
|--------------------------------|------|------|-------|-------|
| ## reg_f_pigeon2               | 0.18 | 1.00 | 14645 | 16368 |
| ## reg_f_fox2                  | 0.13 | 1.00 | 15014 | 15272 |
| ## reg_f_pheasant2             | 0.53 | 1.00 | 12052 | 12762 |
| ## reg_f_rat2                  | 0.16 | 1.00 | 14106 | 16231 |
| ## reg_f_shoot2                | 0.17 | 1.00 | 14419 | 16147 |
| ## reg_f_hunt2                 | 0.14 | 1.00 | 14760 | 16104 |
| ## reg_f_outsource1            | 0.16 | 1.00 | 14808 | 16126 |
| ## reg_f_feedlorry1            | 0.10 | 1.00 | 14972 | 15800 |
| ## reg_f_muckspreader1         | 0.16 | 1.00 | 15360 | 15778 |
| ## reg_f_muckspreader3         | 0.15 | 1.00 | 13839 | 14825 |
| ## reg_f_aiexternal1           | 0.24 | 1.00 | 14465 | 15744 |
| ## reg_f_machinery1            | 0.20 | 1.00 | 14707 | 15525 |
| ## reg_f_bedmilk_1yes          | 0.11 | 1.00 | 14115 | 15586 |
| ## reg_f_bedmilk_2yes          | 0.17 | 1.00 | 14930 | 15563 |
| ## reg_f_bedmilk_3yes          | 0.11 | 1.00 | 15163 | 16568 |
| ## reg_f_bedmilk_4yes          | 0.92 | 1.00 | 12641 | 11406 |
| ## reg_f_bedmilk_6yes          | 0.23 | 1.00 | 14255 | 15385 |
| ## reg_f_bedmilk_8yes          | 0.19 | 1.00 | 14108 | 14970 |
| ## reg_f_foragetype_1yes       | 0.32 | 1.00 | 14294 | 15244 |
| ## reg_f_foragetype_2yes       | 0.09 | 1.00 | 13982 | 13409 |
| ## reg_f_foragetype_3yes       | 0.73 | 1.00 | 6926  | 8987  |
| ## reg_f_foragetype_4yes       | 0.08 | 1.00 | 14610 | 15380 |
| ## reg_f_foragetype_5yes       | 0.50 | 1.00 | 12153 | 14166 |
| ## reg_f_foragetype_6yes       | 0.36 | 1.00 | 14443 | 13947 |
| ## reg_f_foragetype_7yes       | 0.17 | 1.00 | 14601 | 14993 |
| ## reg_f_foragetype_8yes       | 0.15 | 1.00 | 13591 | 14346 |
| ## reg_f_manure_1yes           | 0.10 | 1.00 | 13613 | 13246 |
| ## reg_f_manure_2yes           | 0.19 | 1.00 | 13820 | 15694 |
| ## reg_f_manure_3yes           | 0.36 | 1.00 | 12336 | 12951 |
| ## reg_f_manure_4yes           | 0.18 | 1.00 | 15112 | 15585 |
| ## reg_f_manure_5yes           | 0.12 | 1.00 | 14838 | 16288 |
| ## reg_f_manure_6yes           | 0.20 | 1.00 | 13869 | 14869 |
| ## reg_f_manure_7yes           | 0.22 | 1.00 | 13605 | 15142 |
| ## reg_f_manure_8yes           | 0.20 | 1.00 | 14965 | 15620 |
| ## reg_f_manure_9yes           | 0.23 | 1.00 | 14470 | 15547 |
| ## reg_s_housed_outdooroutdoor | 0.03 | 1.00 | 8428  | 13167 |
| ## reg_f_cefq_dct1             | 0.08 | 1.00 | 14984 | 15398 |
| ## reg_f_ceph_dct1             | 0.34 | 1.00 | 13563 | 15333 |
| ## reg_f_fram_dct1             | 0.09 | 1.00 | 13237 | 13811 |
| ## reg_f_clox_dct1             | 0.14 | 1.00 | 14439 | 15756 |
| ## reg_s_calving_now1          | 0.69 | 1.00 | 8740  | 14721 |
| ## reg_f_water1                | 0.13 | 1.00 | 15053 | 15394 |
| ## reg_preweaned_heifer1       | 0.92 | 1.00 | 15758 | 16629 |
| ## main_mes_temp0.61           | 0.57 | 1.00 | 13442 | 15781 |

##  
## Samples were drawn using sampling(NUTS). For each parameter, Eff.Sample  
## is a crude measure of effective sample size, and Rhat is the potential  
## scale reduction factor on split chains (at convergence, Rhat = 1).

**Figure S4:** Sensitivity of *bla*<sub>CTX-M</sub> *E. coli* detection at different minimum prevalence of *bla*<sub>CTX-M</sub>-positive *E. coli* (*q*) as a proportion of total *E. coli* in a sample.

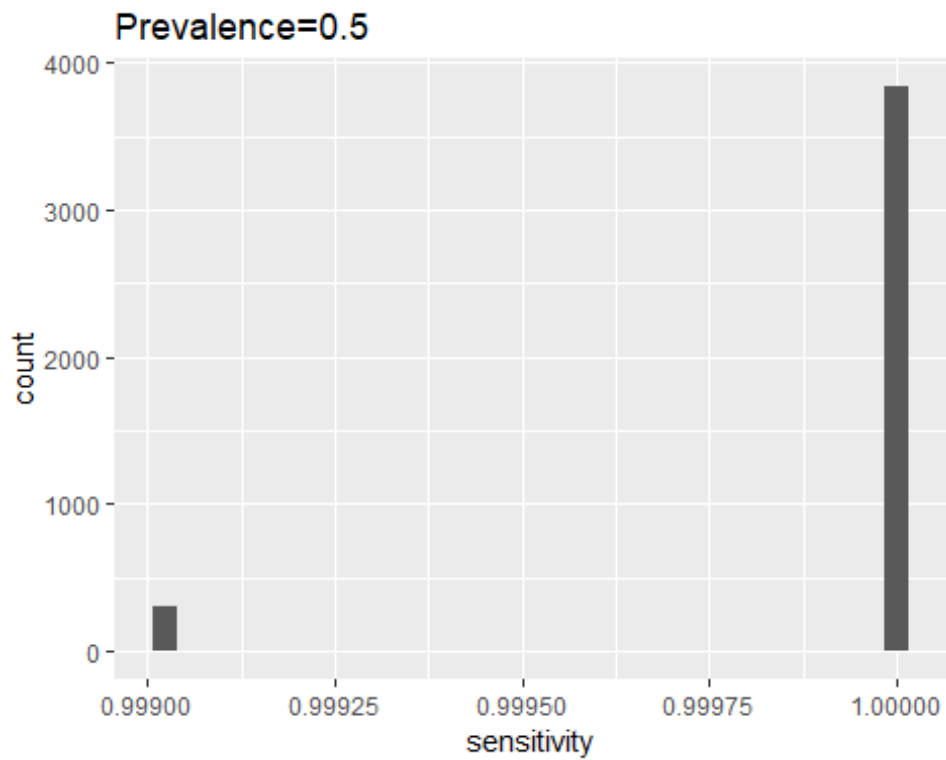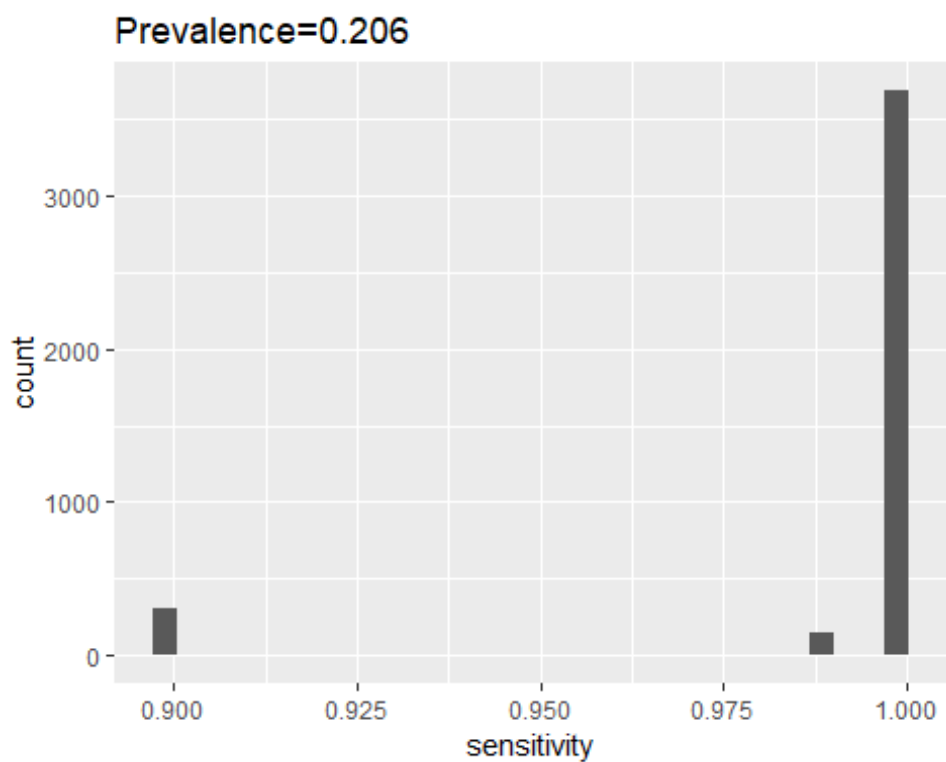

Prevalence=0.085

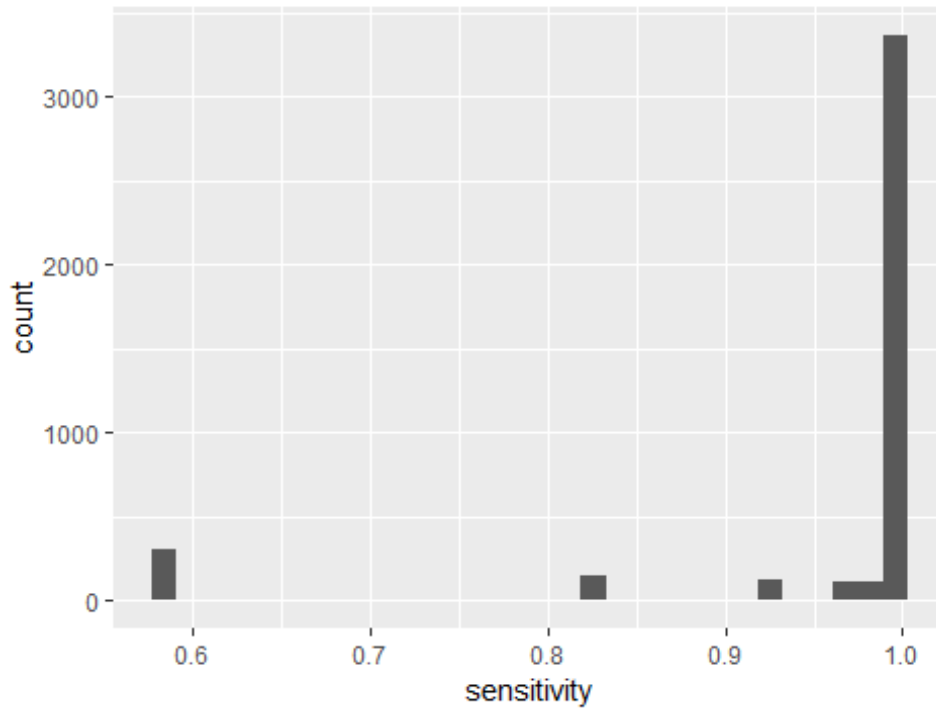

Prevalence=0.035

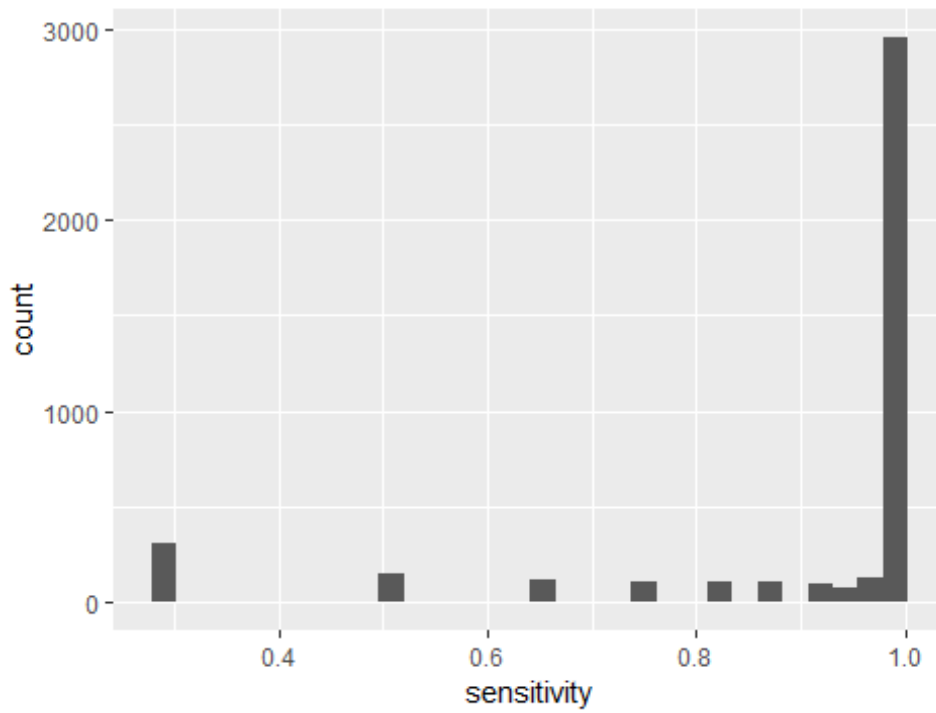

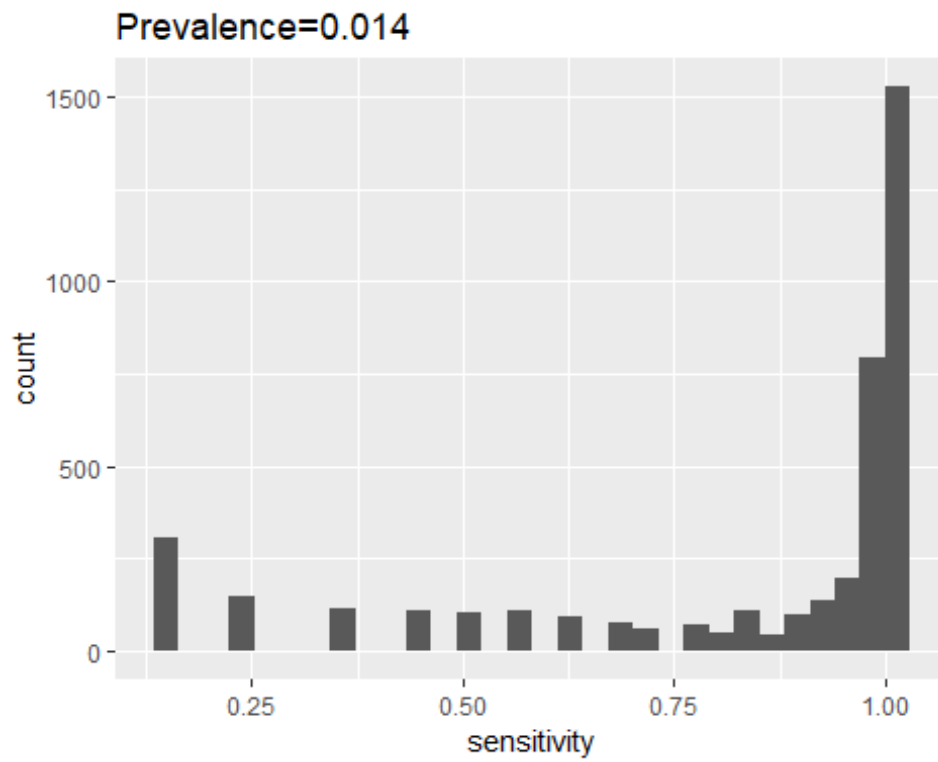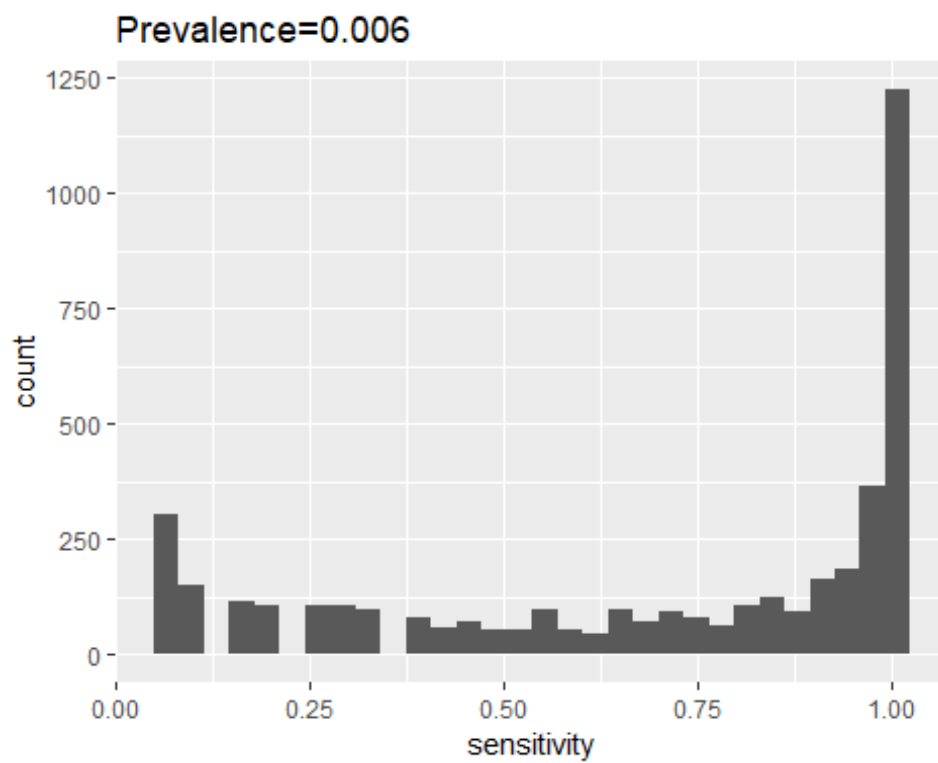

Prevalence=0.002

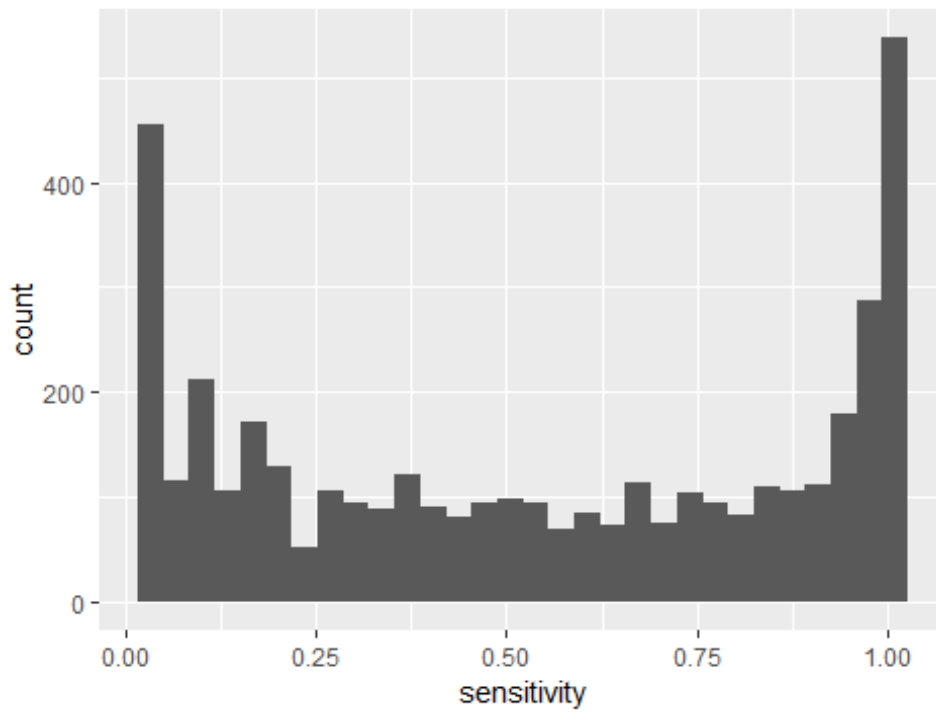

Prevalence=0.001

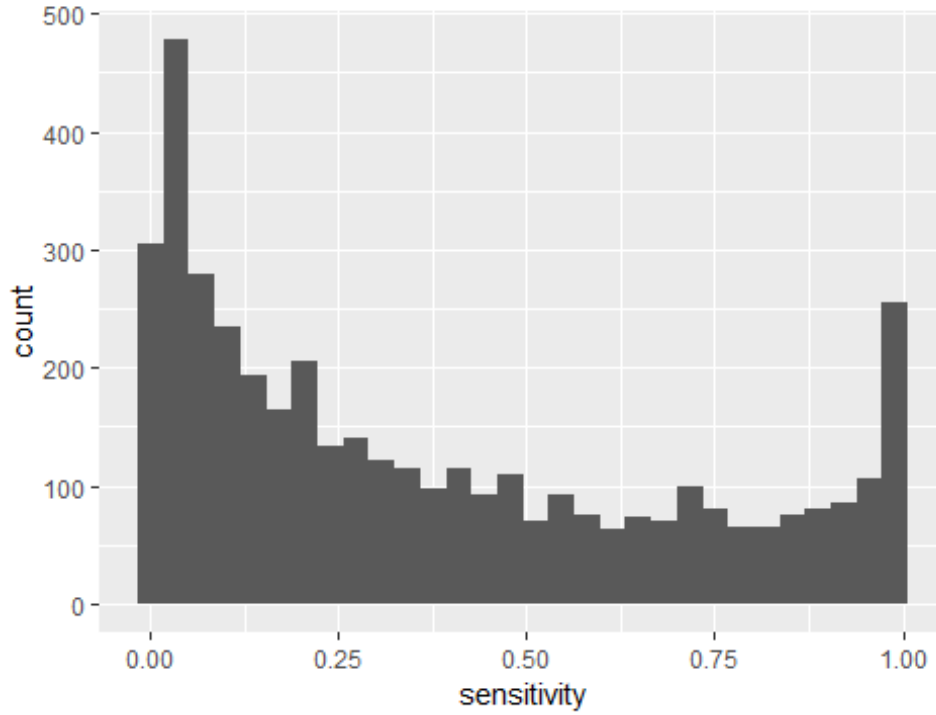

**Figure S5:** R-code for link function used to account for measurement error for resistant *E. coli* in samples due to sensitivity issues.

```
logitse <- function(s=1, e=1)
{
  linkfun <- function(mu) qllogis((mu+e-1)/(s+e-1))
  linkinv <- function(eta) plogis(eta) * (s+e-1) + 1 - e
  logit_mu_eta <- function(eta) {
    ifelse(abs(eta)>30, .Machine$double.eps,
           exp(eta)/(1+exp(eta))^2)
  }
  mu.eta <- function(eta) (s + e - 1) *logit_mu_eta(eta)
  valideta <- function(eta) TRUE
  link <- paste("logitse(", deparse(substitute(s)), ", ",
               deparse(substitute(e)), ")", sep="")
  structure(list(linkfun = linkfun,
                 linkinv = linkinv,
                 mu.eta = mu.eta,
                 logit_mu_eta = logit_mu_eta,
                 valideta = valideta,
                 name = link),
            class = "link-glm")
}
```



**Figure S6:** Trace plots from the Bayesian models of the variables that were identified as associated with resistance, all showing evidence of good convergence.

**Amoxicillin**

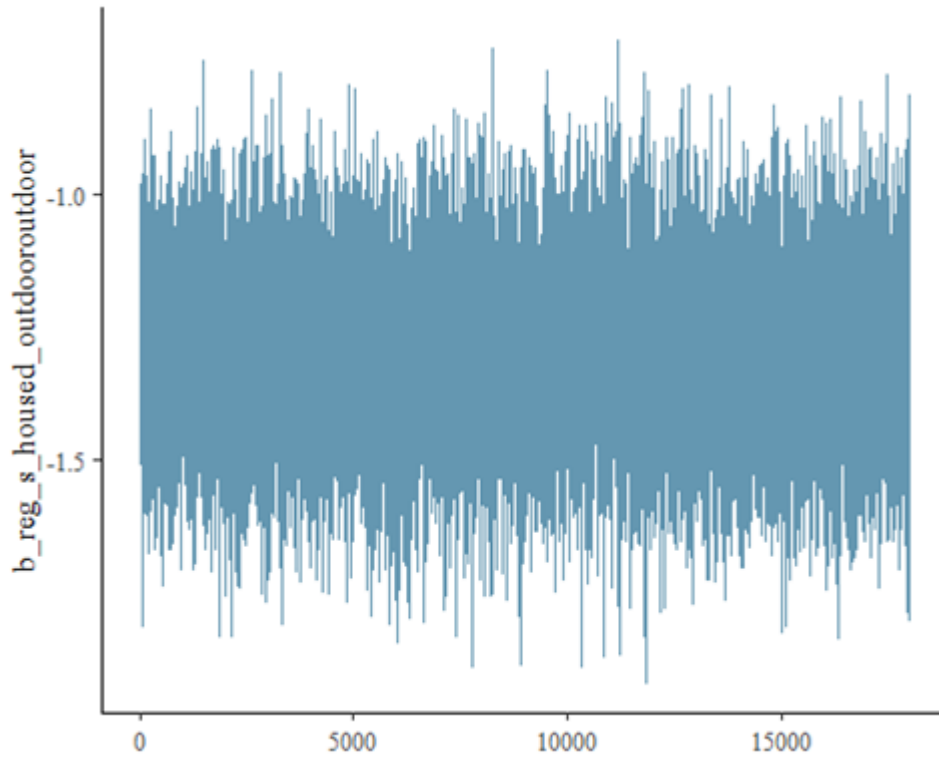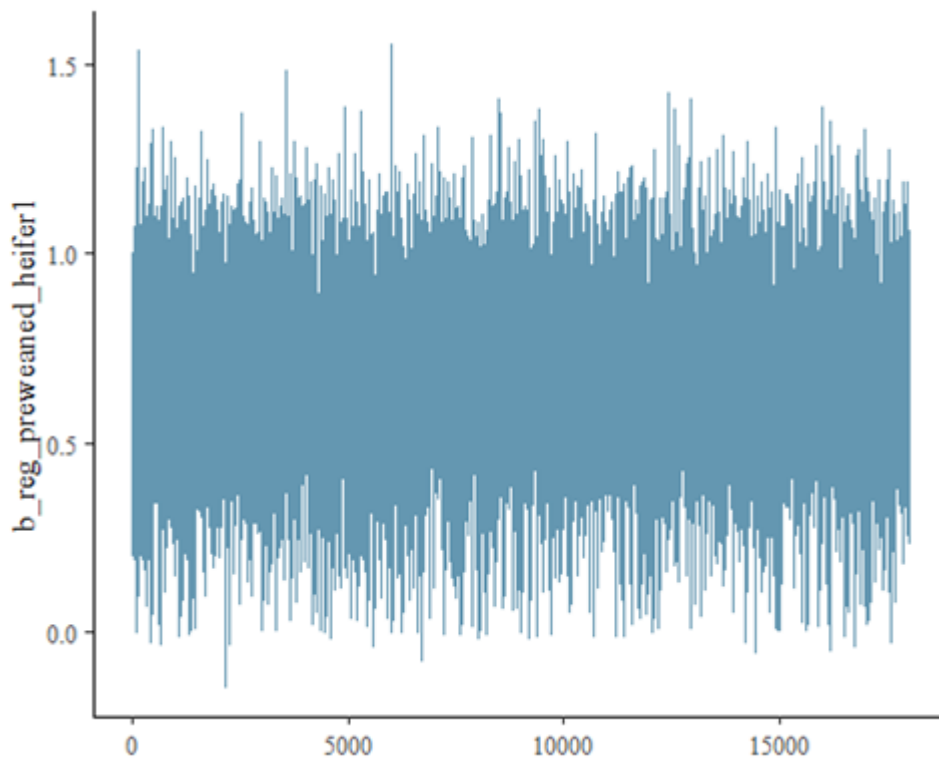

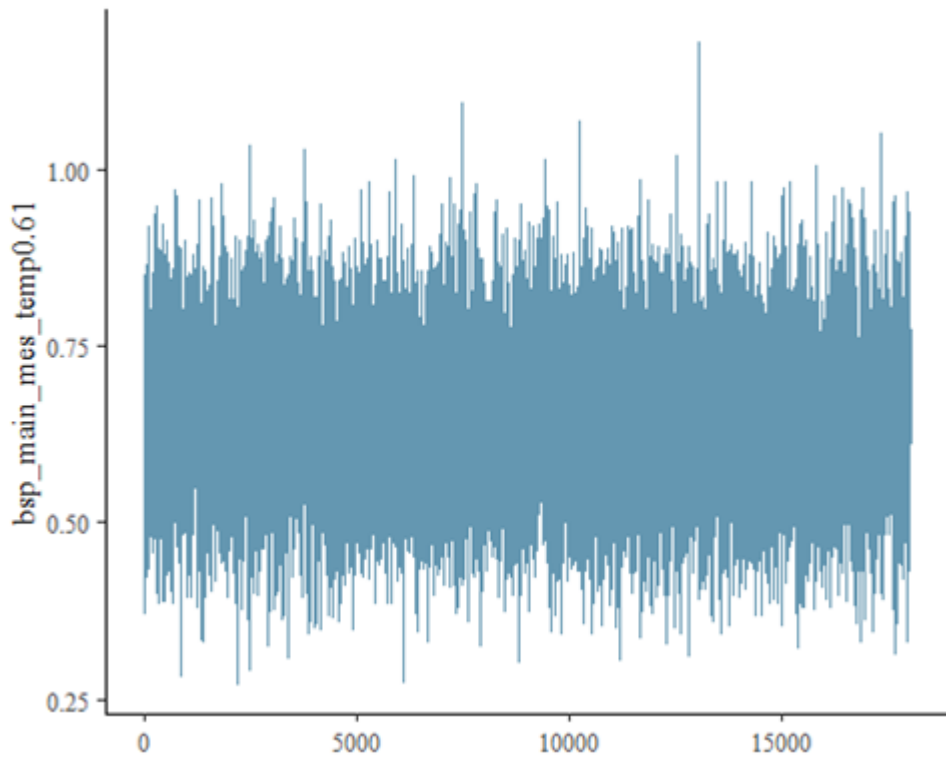

## Ciprofloxacin

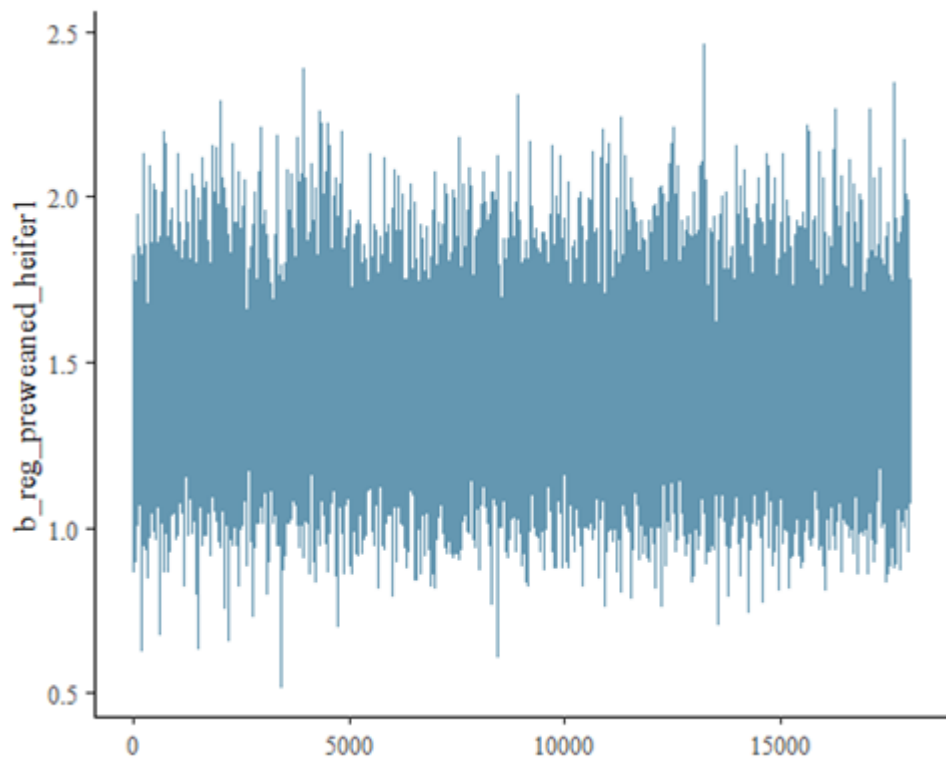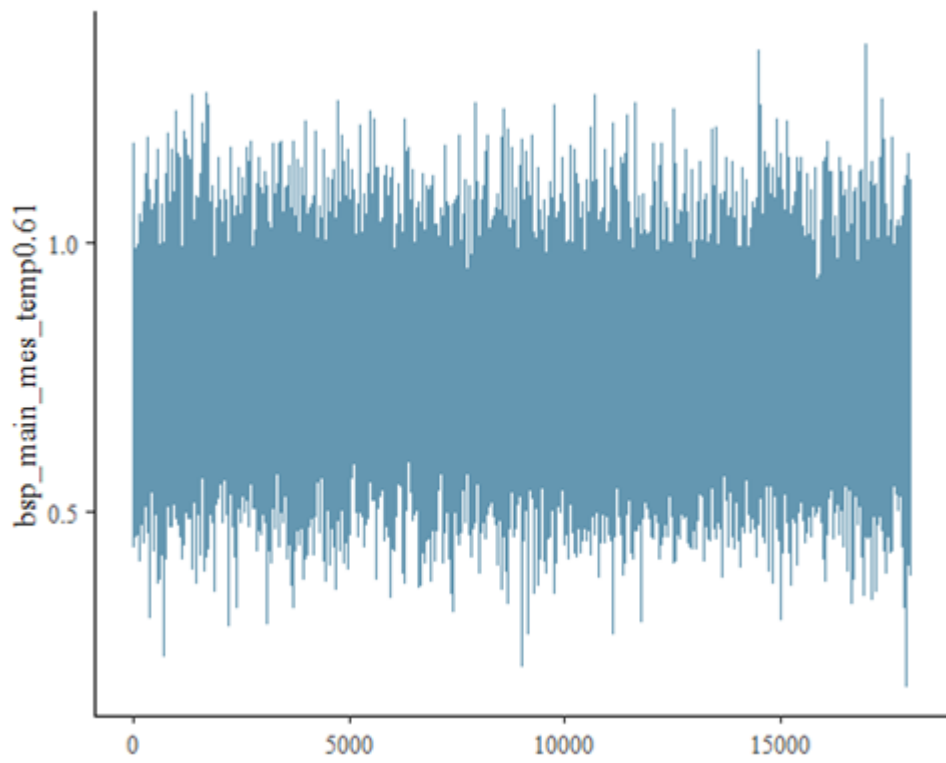

## Streptomycin

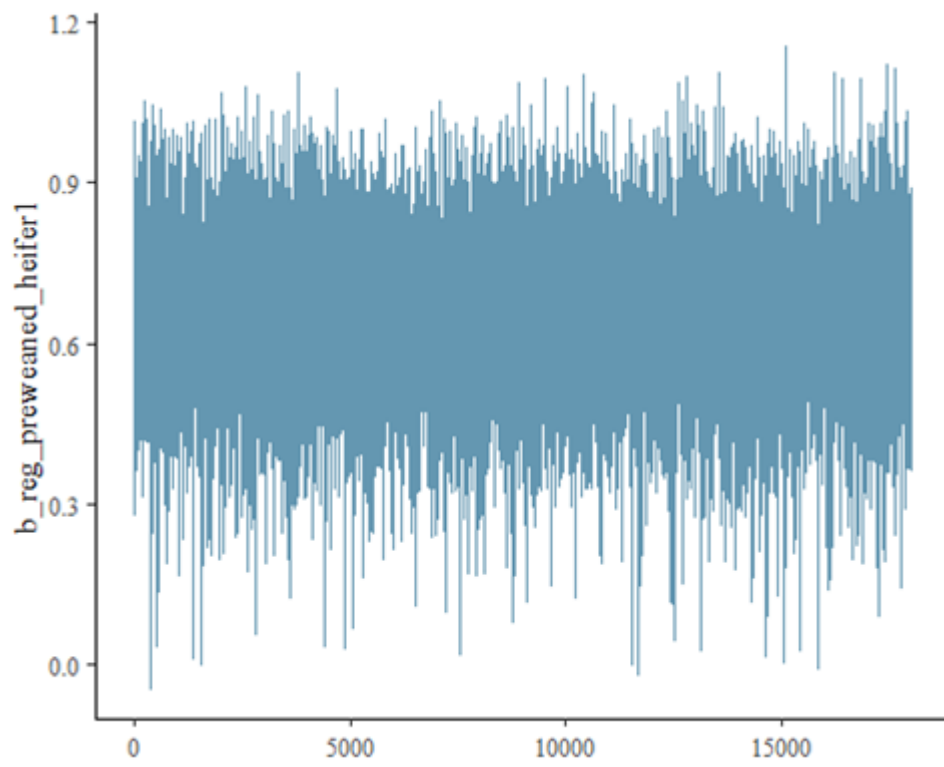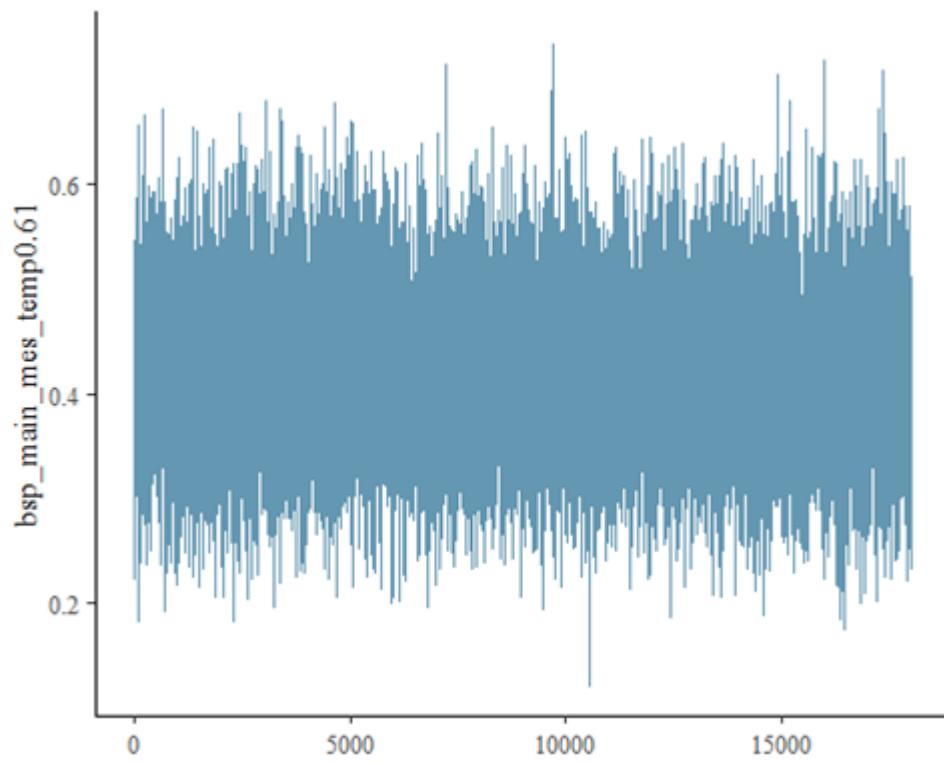

# Tetracycline

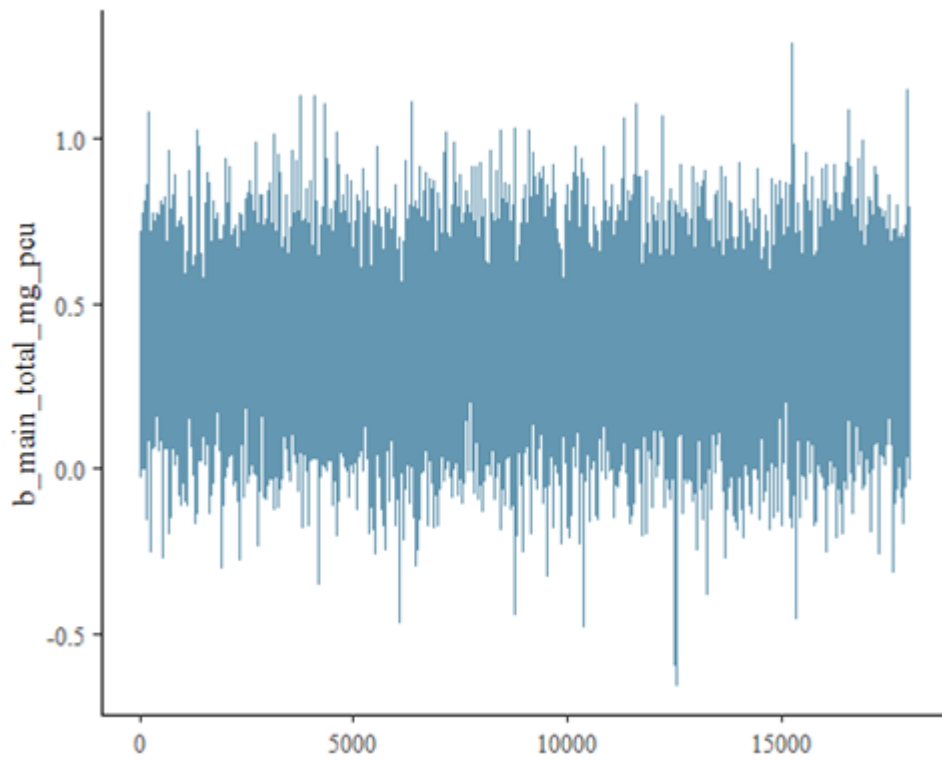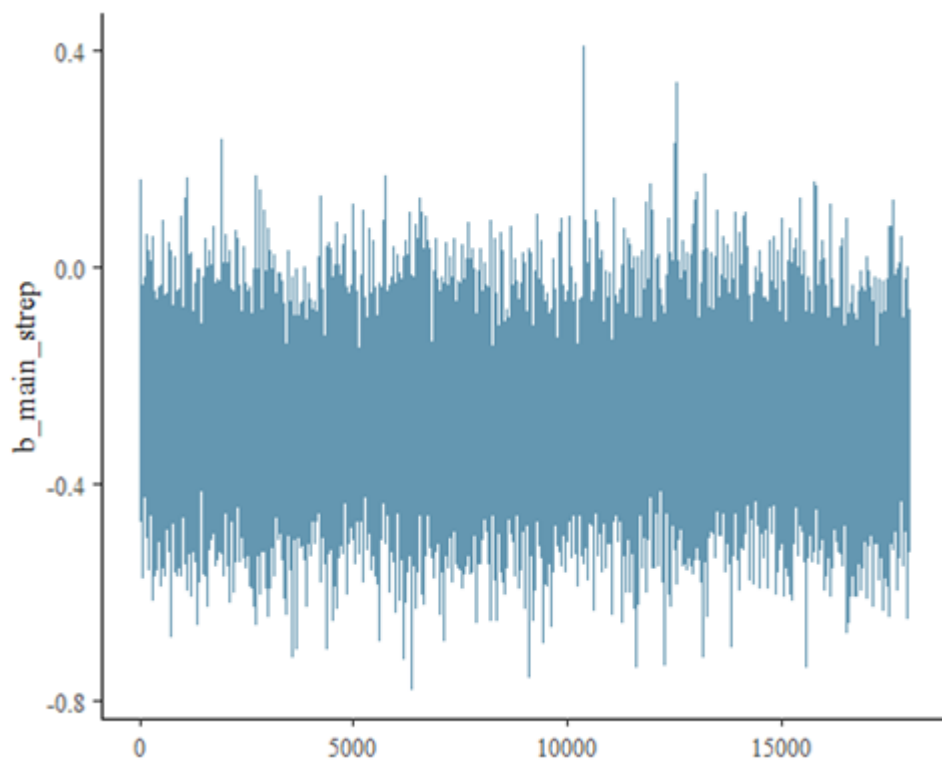

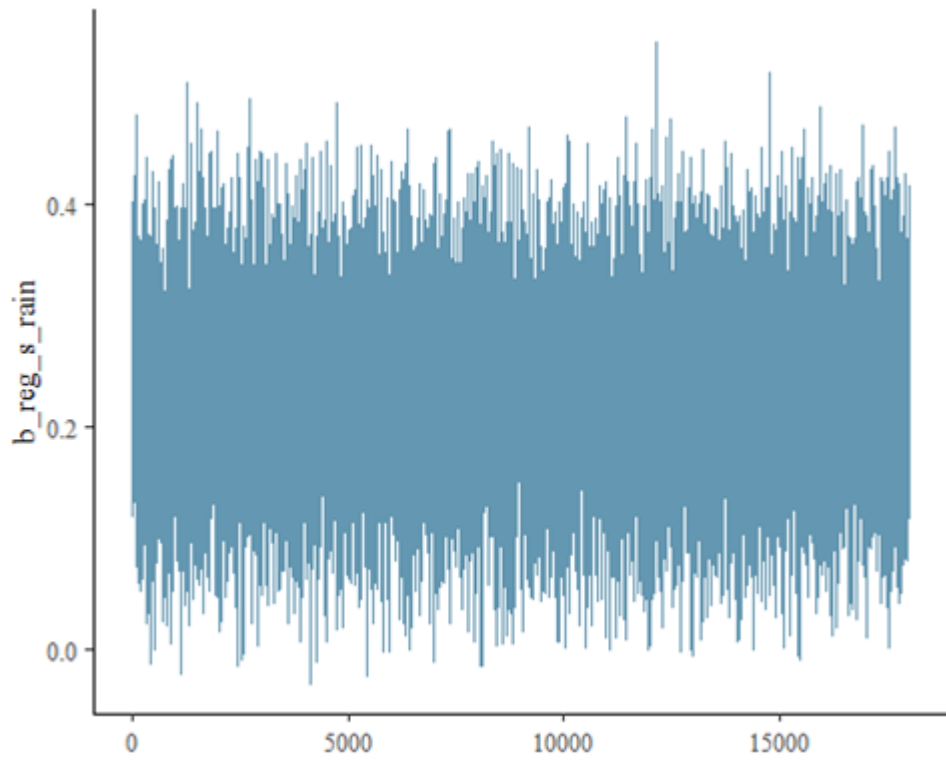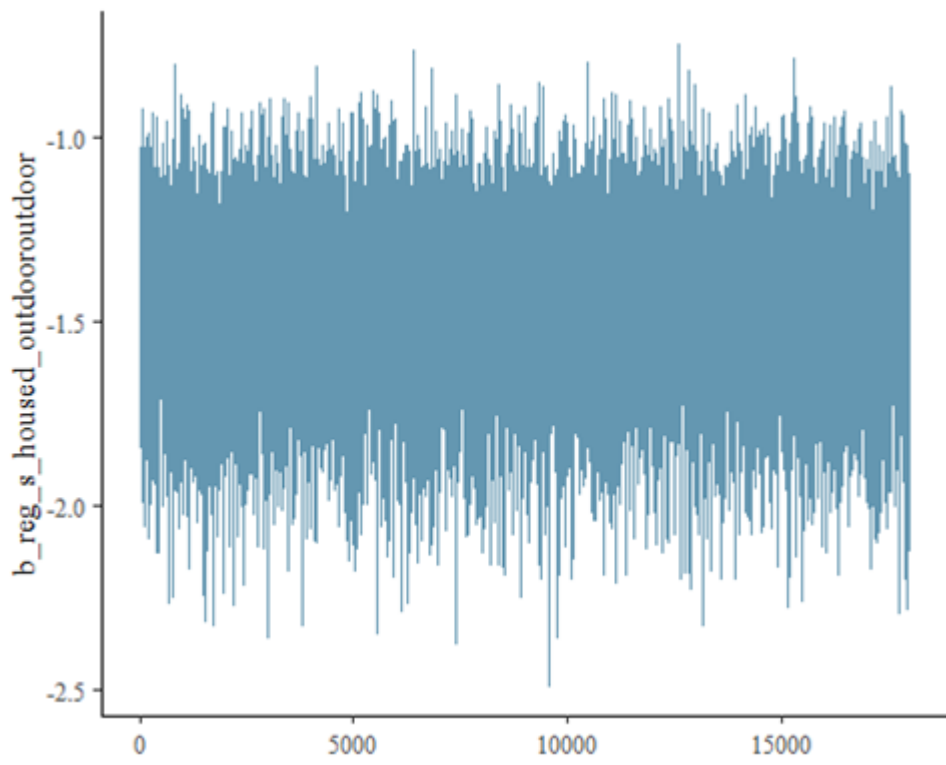

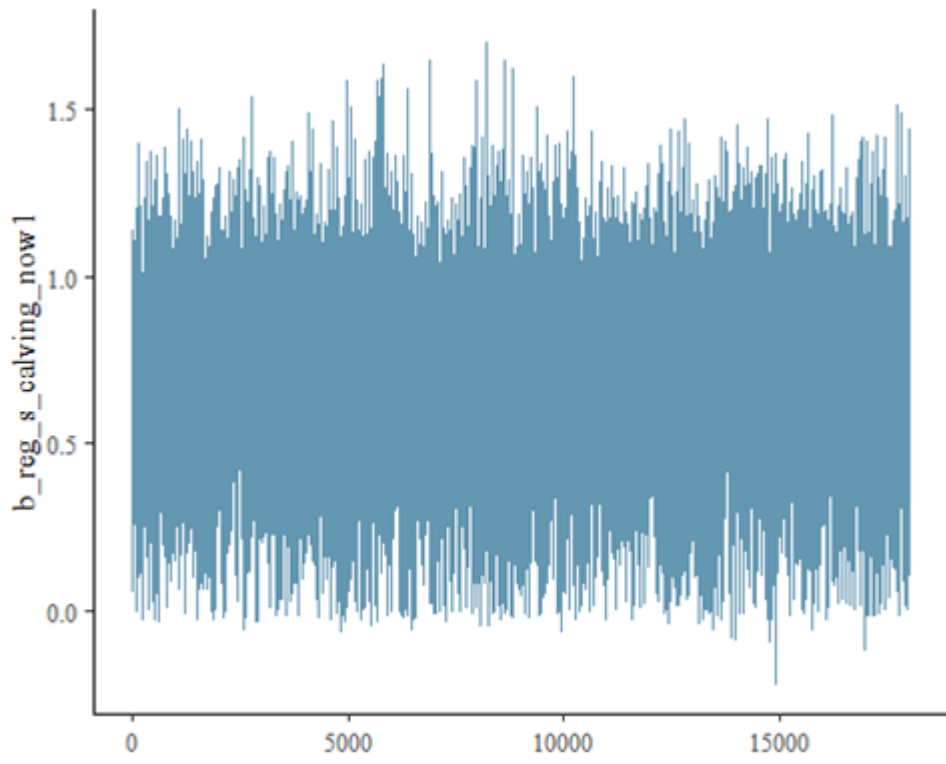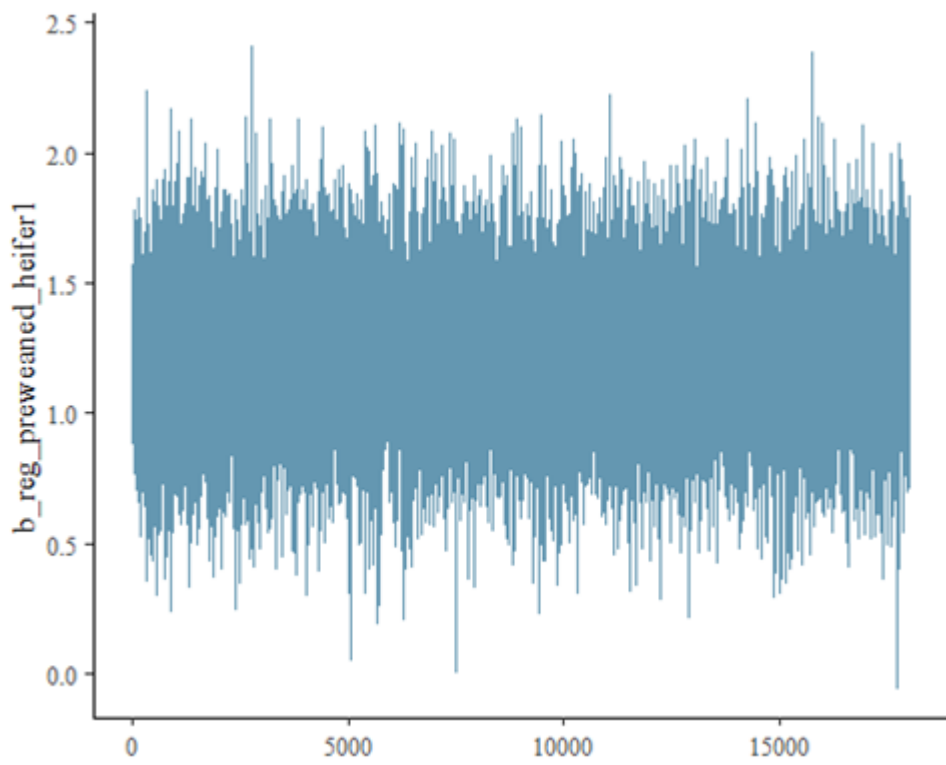

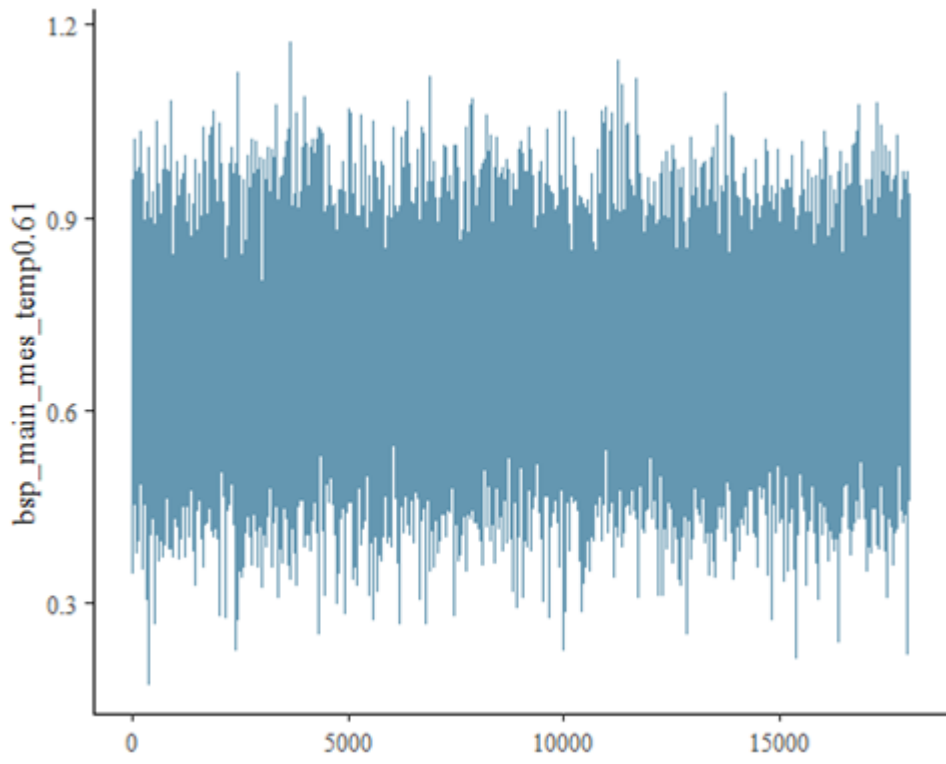



**Figure S7:** Posterior distributions with medians and 95% credible intervals of the variables that were associated with resistance.

**Amoxicillin**

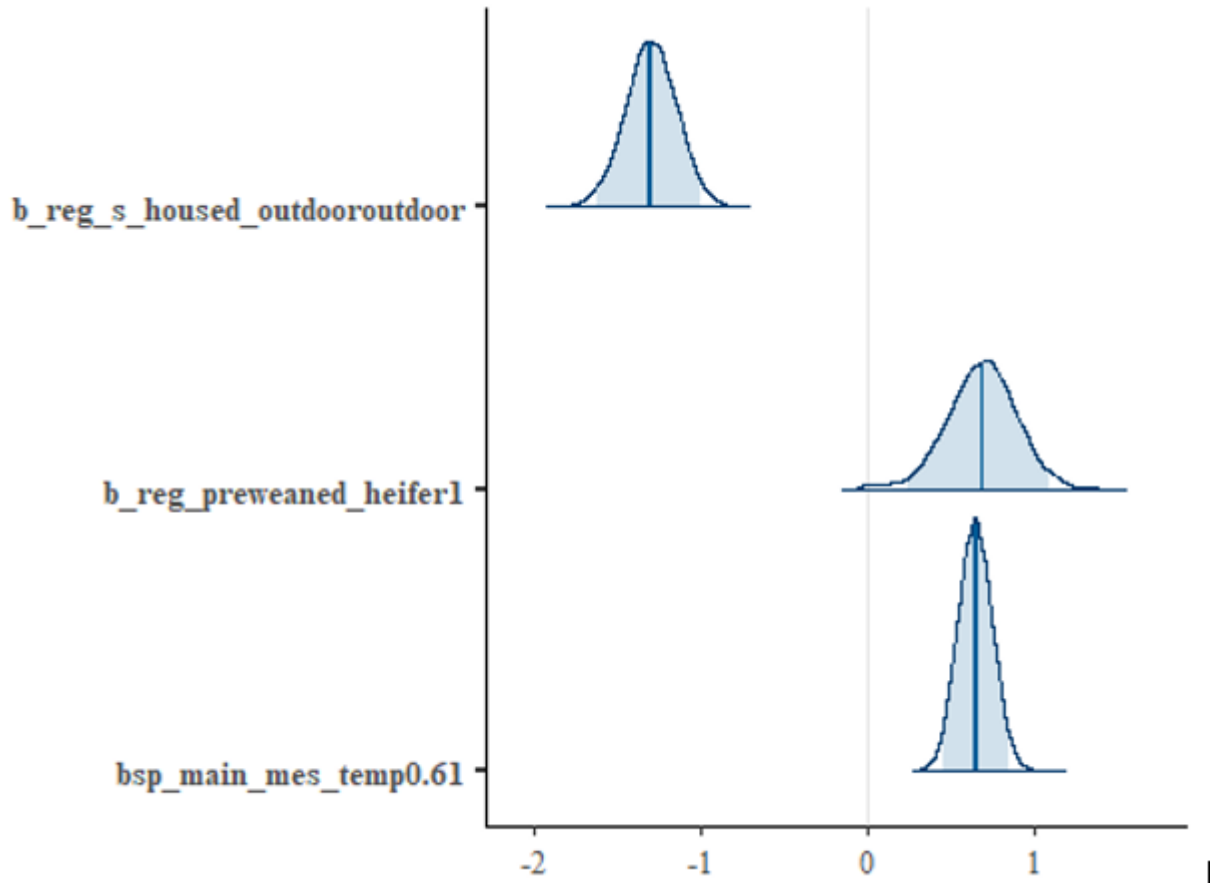

# Ciprofloxacin

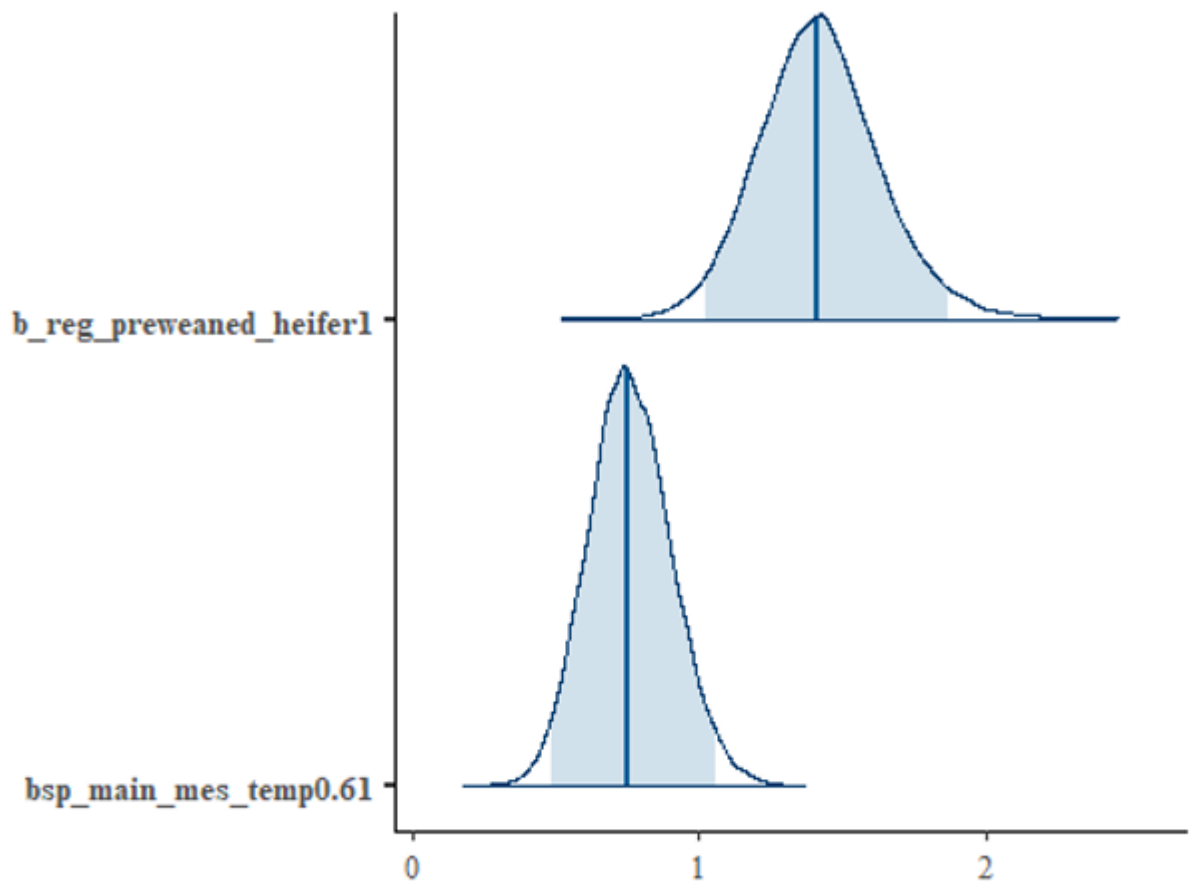

# Streptomycin

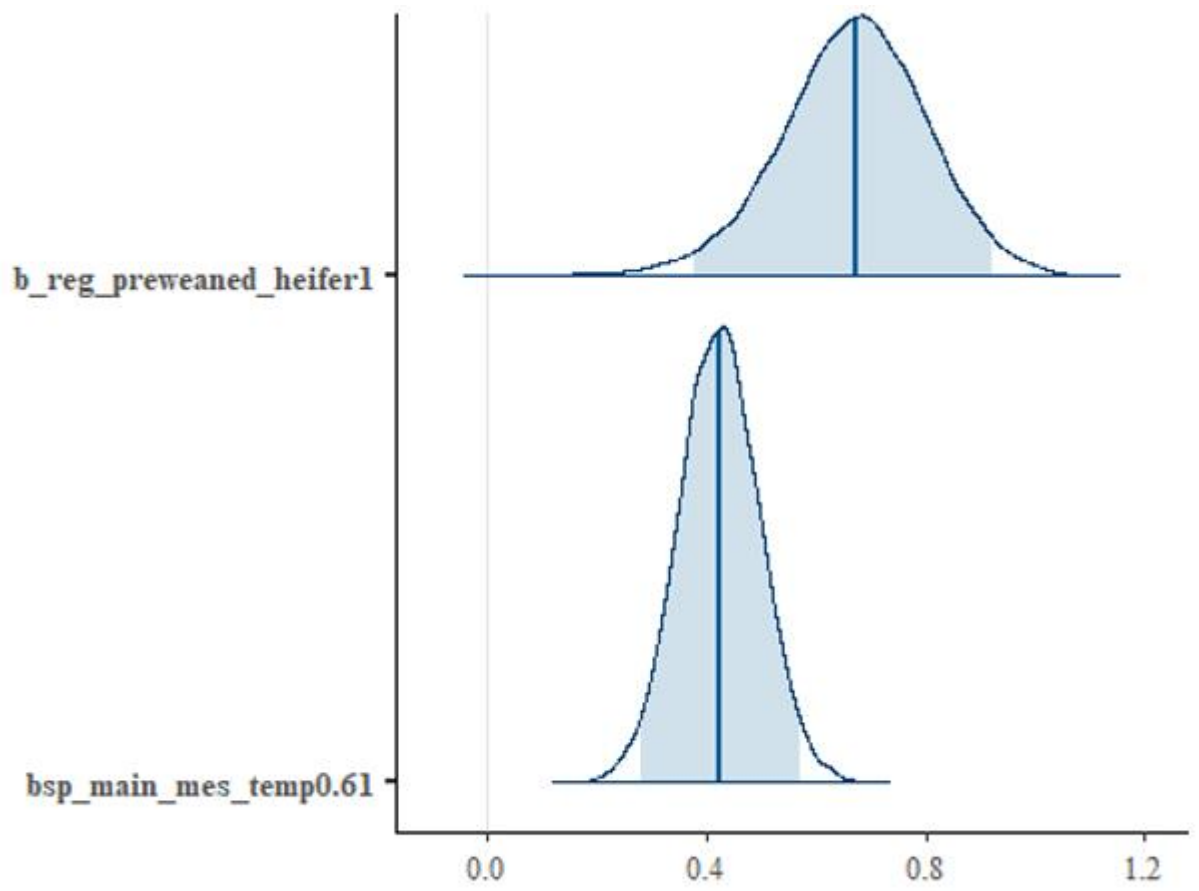

# Tetracycline

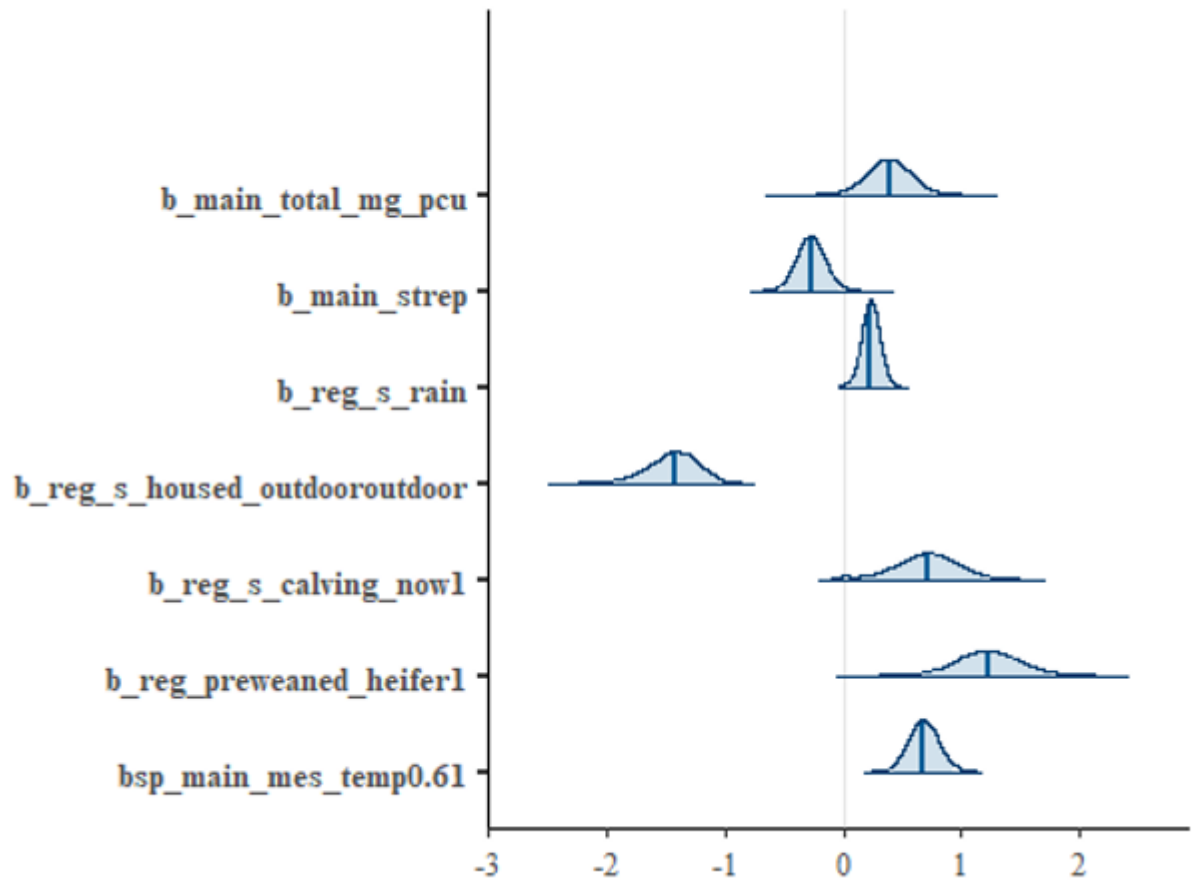

Supplement: AEM.01468-20-s0001.pdf [file AEM.01468-20-s0001.pdf]
